# Supplementary material for: An eight-membered ring formed by the Scholl reaction of o-quateraryls
Source: Royal Society of Chemistry journal article supplement (doi:10.1039/d4qo00029c), 2024-01-01
Supplement: d4qo00029c1.pdf [file d4qo00029c1.pdf]

**Supporting Information for**

**An Eight-Membered Ring Formed by the Scholl Reaction of *o*-Quateraryls**

Xinhe Yang,<sup>#, 1, 3</sup> Man Gao,<sup>#, 2</sup> Han Chen,<sup>2</sup> Qi Gong,<sup>2</sup> Qian Miao<sup>\*, 2, 3</sup>

<sup>1</sup> State Key Laboratory of Antiviral Drugs, Pingyuan Laboratory, School of Chemistry and Chemical Engineering, Henan Normal University, Xinxiang, Henan, 453007, China.

<sup>2</sup> Department of Chemistry, The Chinese University of Hong Kong, Shatin, New Territories, Hong Kong, China

<sup>3</sup> Shanghai-Hong Kong Joint Laboratory in Chemical Synthesis, Shanghai Institute of Organic Chemistry, Chinese Academy of Science, Shanghai, 230032, China

<sup>#</sup> equal contribution

\* email: [miaoqian@cuhk.edu.hk](mailto:miaoqian@cuhk.edu.hk)

**Table of Contents**

1. Synthesis
2. NMR spectra
3. Mass spectra
4. Single crystal structures
5. UV/Vis absorption and fluorescent spectra
6. Chiral resolution and circular dichroism spectrum of **2g**
7. Density functional theory (DFT) calculations
8. Cyclic voltammetry
9. Fabrication and characterization of organic field effect transistors
10. References

## 1. Synthesis

General information: The reagents and starting materials employed were commercially available and used without further purification or otherwise prepared following the reported methods as indicated. Anhydrous and O<sub>2</sub>-free toluene were purified with sodium. Anhydrous and O<sub>2</sub>-free CH<sub>2</sub>Cl<sub>2</sub> and CH<sub>2</sub>ClCH<sub>2</sub>Cl was purified with calcium hydride. Super dry DMF was purchased from J&K Scientific company. NMR spectra were recorded on Agilent, Varian and Bruker 400 MHz spectrometers (<sup>1</sup>H NMR: 400 MHz, <sup>13</sup>C NMR: 100 MHz), and Agilent 600 MHz spectrometer (<sup>1</sup>H NMR: 600 MHz, <sup>13</sup>C NMR: 150 MHz). The chemical shift was recorded in ppm and the following abbreviations were used to indicate multiplicities: s = singlet, d = doublet, t = triplet, m = multiplet, br = broad. Chemical shift values (δ) are expressed in parts per million using residual solvent protons (<sup>1</sup>H NMR, δH = 7.26 for CDCl<sub>3</sub>, δH = 5.32 for CD<sub>2</sub>Cl<sub>2</sub>, and δH = 2.50 ppm for DMSO-d<sub>6</sub>, δH = 2.05 for (CD<sub>3</sub>)<sub>2</sub>CO; <sup>13</sup>C NMR, δC = 77.16 for CDCl<sub>3</sub>, δC = 53.84 for CD<sub>2</sub>Cl<sub>2</sub>, and δC = 39.52 ppm for DMSO-d<sub>6</sub>, δC = 29.84 and 206.26 for (CD<sub>3</sub>)<sub>2</sub>CO) as internal standard. Mass spectra were recorded on a AccuTOF LC-plus 4G spectrometer and Bruker Autoflex speed MALDI-TOFMS. Melting points, without correction, were measured using an Automatic melting point apparatus SGW X-4A from Shanghai INESA Physico-Optical Instrument Co., Ltd.

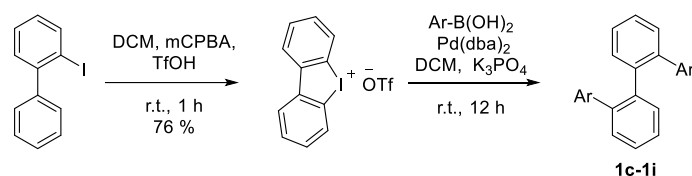

**Scheme S1.** Synthesis of **1c-1i**.

Dibenzo[b,d]iodol-5-ium triflate, **1g** and **1l** were prepared according to the reported procedures.<sup>1</sup>

General Procedure for the Synthesis of compounds **1c-i**:<sup>1</sup> Dibenzo[b,d]iodol-5-ium triflate (0.342 g, 0.80 mmol, 1.0 equiv.), arylboronic acid (2.0 mmol, 2.5 equiv.), Pd(dba)<sub>2</sub> (0.008 mmol, 0.01 equiv.), and K<sub>3</sub>PO<sub>4</sub> (4 mmol, 5.0 equiv.) were added into a 100 ml Schlenk flask. The flask was charged with nitrogen atmosphere. Then, 20 ml of CH<sub>2</sub>Cl<sub>2</sub> that had been pre-bubbled with nitrogen for 30 min was added into the Schlenk flask with continuous stirring. The color of reaction suspension changed from purple to brown within a few minutes. The reaction was kept stirring for 12 hours at room temperature. The solvent was then removed under reduced pressure. The residue was further purified by column chromatography on silica gel using the eluent as indicated below, affording the desired products.

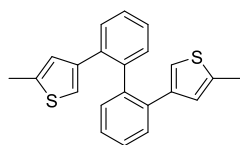

Compound **1c**: The crude product was purified by column chromatography on silica gel using hexane as eluent to obtain **1c** as white solid (0.086 g, 31% yield).

Melting point: 67-70 °C. <sup>1</sup>H NMR (400 MHz, CDCl<sub>3</sub>): δ = 7.31-7.30 (m, 8H), δ = 6.27 (s, 2H),

$\delta = 6.15$  (s, 2H),  $\delta = 2.30$  (s, 6H);  $^{13}\text{C}$  NMR (100 MHz,  $\text{CDCl}_3$ ):  $\delta = 141.3, 140.2, 137.9, 136.2, 131.2, 129.1, 127.5, 127.0, 126.7, 120.4, 15.2$ ; MS (APCI): calcd. for  $\text{C}_{22}\text{H}_{18}\text{S}_2$  ( $[\text{M}+\text{H}]^+$ ): 347.09227, found: 347.09172.

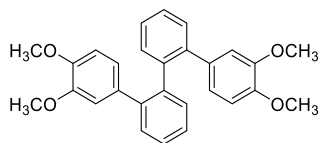

**Compound 1d:** The crude product was purified by column chromatography on silica gel using ethyl acetate/hexane 1:2 (V/V) as eluent to obtain **1d** as white solid (0.276 g, 81% yield).

Melting point: 110-114 °C.  $^1\text{H}$  NMR (400 MHz,  $\text{CDCl}_3$ ):  $\delta = 7.48$  (d,  $J = 7.2$  Hz, 2H),  $\delta = 7.38$  (t,  $J = 7.2$  Hz, 2H),  $\delta = 7.33$  (t,  $J = 7.2$  Hz, 2H),  $\delta = 7.17$  (d,  $J = 7.2$  Hz, 2H),  $\delta = 6.53$  (d,  $J = 8$  Hz, 2H),  $\delta = 6.14$  (d,  $J = 8$  Hz, 2H),  $\delta = 6.09$  (s, 2H),  $\delta = 3.82$  (s, 6H),  $\delta = 3.45$  (s, 6H);  $^{13}\text{C}$  NMR (100 MHz,  $\text{CDCl}_3$ ):  $\delta = 147.6, 147.1, 140.5, 140.1, 133.5, 131.3, 129.4, 127.5, 126.9, 121.2, 112.2, 110.1, 55.8, 55.2$ ; MS (APCI): calcd. for  $\text{C}_{28}\text{H}_{26}\text{O}_4$  ( $[\text{M}+\text{H}]^+$ ): 427.19039, found: 427.19009.

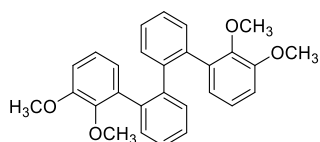

**Compound 1e:** The crude product was purified by column chromatography on silica gel using ethyl acetate/hexane 1:5 (V/V) as eluent to obtain **1e** as white solid (0.159 g, 47% yield).

Melting point: 175-176 °C.  $^1\text{H}$  NMR (400 MHz,  $\text{CDCl}_3$ ):  $\delta = 7.32$  (d,  $J = 7.6$  Hz, 2H),  $\delta = 7.20$  (d,  $J = 7.6$  Hz, 2H),  $\delta = 7.17$ -7.09 (m, 4H),  $\delta = 6.85$ -6.84 (m, 2H),  $\delta = 6.80$ -6.78 (m, 2H),  $\delta = 6.65$ -6.64 (m, 2H),  $\delta = 3.85$  (s, 6H),  $\delta = 3.53$  (s, 6H);  $^{13}\text{C}$  NMR (100 MHz,  $\text{CDCl}_3$ ):  $\delta = 152.8, 146.8, 140.1, 137.1, 136.1, 131.5, 131.0, 126.6, 126.3, 124.1, 123.1, 111.2, 60.3, 55.9$ ; MS (APCI): calcd. for  $\text{C}_{28}\text{H}_{26}\text{O}_4$  ( $[\text{M}+\text{H}]^+$ ): 427.19039, found: 427.18994.

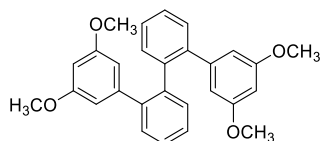

**Compound 1f:** The crude product was purified by column chromatography on silica gel using ethyl acetate/hexane 1:3 (V/V) as eluent to obtain **1f** as yellow oil (0.334 g, 98% yield).

$^1\text{H}$  NMR (400 MHz,  $\text{CDCl}_3$ ):  $\delta = 7.51$  (d,  $J = 7.6$  Hz, 2H),  $\delta = 7.42$  (t,  $J = 7.2$  Hz, 2H),  $\delta = 7.36$  (t,  $J = 7.2$  Hz, 2H),  $\delta = 7.24$  (d,  $J = 7.6$  Hz, 2H),  $\delta = 6.24$  (s, 2H),  $\delta = 5.79$  (s, 4H),  $\delta = 3.50$  (s, 12H);  $^{13}\text{C}$  NMR (100 MHz,  $\text{CDCl}_3$ ):  $\delta = 159.9, 142.7, 141.1, 140.4, 131.4, 129.6, 127.7, 127.4, 107.0, 99.7, 55.0$ ; MS (APCI): calcd. for  $\text{C}_{28}\text{H}_{26}\text{O}_4$  ( $[\text{M}+\text{H}]^+$ ): 427.19039, found: 427.19008.

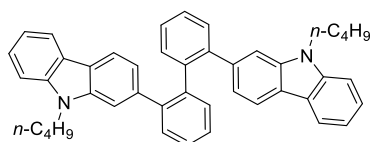

Compound **1h**: The crude product was purified by column chromatography on silica gel using CH<sub>2</sub>Cl<sub>2</sub>/hexane 1:1 (V/V) as eluent to obtain **1h** as white solid (0.429 g, 90% yield).

Melting point: 108-112 °C. <sup>1</sup>H NMR (400 MHz, CDCl<sub>3</sub>): δ = 8.01 (d, *J* = 7.6 Hz, 2H), δ = 7.62-7.60 (m, 4H), δ = 7.48-7.42 (m, 4H), δ = 7.41-7.38 (t, *J* = 8 Hz, 2H), δ = 7.24-7.19 (m, 6H), δ = 6.39 (d, *J* = 8 Hz, 2H), δ = 6.28 (s, 2H), δ = 3.35-3.21 (m, 4H), δ = 1.41-1.34 (m, 4H), δ = 1.10-1.04 (m, 4H), δ = 0.77 (t, *J* = 7.2 Hz, 6H); <sup>13</sup>C NMR (100 MHz, CDCl<sub>3</sub>): δ = 142.0, 140.7, 140.1, 138.7, 132.0, 130.3, 127.6, 127.2, 125.3, 122.8, 120.51, 120.47, 120.3, 118.9, 118.6, 109.6, 108.5, 41.9, 30.7, 20.3, 13.7; MS (APCI): calcd. for C<sub>44</sub>H<sub>40</sub>N<sub>2</sub> ([M+H]<sup>+</sup>): 597.32643, found: 597.32582.

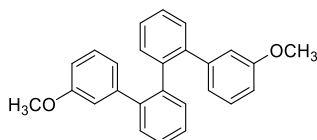

Compound **1i**: The crude product was purified by column chromatography on silica gel using ethyl acetate/hexane 1:50 (V/V) as eluent to obtain **1i** as colorless oil (0.152 g, 52% yield).

<sup>1</sup>H NMR (400 MHz, CDCl<sub>3</sub>): δ = 7.47 (d, *J* = 7.6 Hz, 2H), δ = 7.40-7.35 (m, 4H), δ = 7.21 (d, *J* = 7.2 Hz, 2H), δ = 6.91 (t, *J* = 8 Hz, 2H), δ = 6.66 (d, *J* = 8.4 Hz, 2H), δ = 6.23 (d, *J* = 7.6 Hz, 2H), δ = 6.13 (s, 2H), δ = 3.52 (s, 6H); <sup>13</sup>C NMR (100 MHz, CDCl<sub>3</sub>): δ = 158.9, 142.3, 141.0, 140.3, 131.6, 129.9, 128.4, 127.7, 127.4, 121.9, 113.9, 112.9, 54.9; MS (APCI): calcd. for C<sub>26</sub>H<sub>22</sub>O<sub>2</sub> ([M+H]<sup>+</sup>): 367.16926, found: 367.16855.

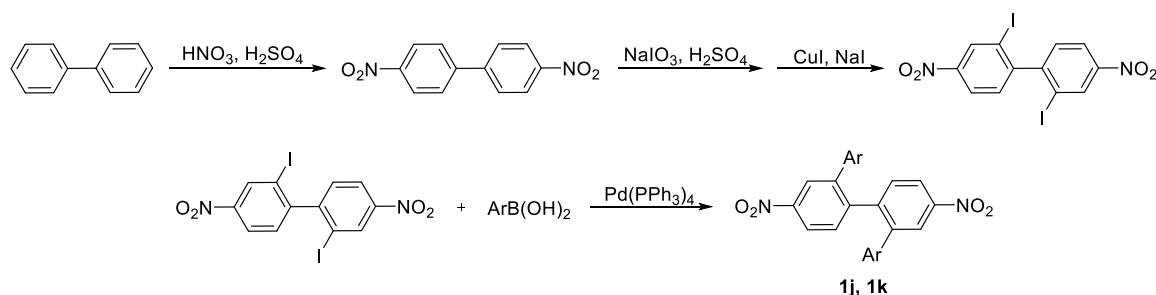

**Scheme S2.** Synthesis of **1j-1k**.

2,2'-Diiodo-4,4'-dinitrobiphenyl was prepared according to the reported procedures.<sup>2, 3</sup>

General Procedure for the synthesis of compounds **1j**, **1k**: 2,2'-Diiodo-4,4'-dinitrobiphenyl (1 eq), arylboronic acid (5 eq), Na<sub>2</sub>CO<sub>3</sub> (5 eq), Pd(PPh<sub>3</sub>)<sub>4</sub> (0.1 eq) were dissolved in a degassed mixture of toluene: ethanol: H<sub>2</sub>O = 2: 1: 1 (0.1 M) under a N<sub>2</sub> atmosphere. The mixture was stirred at 80 °C overnight. Thereafter, the mixture was extracted with CH<sub>2</sub>Cl<sub>2</sub>, dried over Na<sub>2</sub>SO<sub>4</sub>, and concentrated under a reduced pressure. The residue was purified by column chromatography on silica gel using the eluent indicated below, affording the desired products.

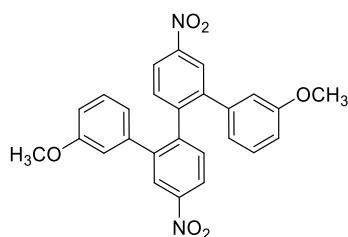

Compound **1j**: The crude product was purified by column chromatography on silica gel using CH<sub>2</sub>Cl<sub>2</sub>/hexane 1:3 (V/V) as eluent to give **1j** as yellow solid (187 mg, 41% yield).

Melting point: 168-169 °C. <sup>1</sup>H NMR (400 MHz, CDCl<sub>3</sub>) δ 8.25 (dd, *J* = 8.4, 2.4 Hz, 2H), 8.08 (d, *J* = 2.4 Hz, 2H), 7.60 (d, *J* = 8.4 Hz, 2H), 6.97 (t, *J* = 8.0 Hz, 2H), 6.76 – 6.73 (m, 2H), 6.18 (d, *J* = 7.6 Hz, 2H), 6.09 (t, *J* = 2.4 Hz, 2H), 3.61 (s, 6H); <sup>13</sup>C NMR (100 MHz, CDCl<sub>3</sub>) δ 159.6, 147.9, 144.8, 142.5, 139.3, 132.3, 129.2, 125.2, 122.3, 121.6, 114.2, 113.8, 55.1. MS (DART): calcd. for C<sub>26</sub>H<sub>21</sub>O<sub>6</sub>N<sub>2</sub> ([M+H]<sup>+</sup>): 457.1394, found: 457.1393.

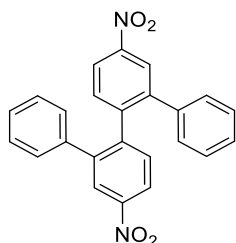

Compound **1k**: The crude product was purified by column chromatography on silica gel using CH<sub>2</sub>Cl<sub>2</sub>/hexane 1:5 (V/V) as eluent to obtain **1k** as yellow solid (335 mg, 21% yield).

Melting point: 209-210 °C. <sup>1</sup>H NMR (400 MHz, CDCl<sub>3</sub>) δ 8.24 (dd, *J* = 8.8, 2.4 Hz, 2H), 8.08 (d, *J* = 2.4 Hz, 2H), 7.58 (d, *J* = 8.4 Hz, 2H), 7.22 – 7.18 (m, 2H), 7.08 (t, *J* = 7.6 Hz, 4H), 6.59 (d, *J* = 8.0 Hz, 4H); <sup>13</sup>C NMR (100 MHz, CDCl<sub>3</sub>) δ 148.0, 144.6, 142.7, 138.0, 132.4, 129.0, 128.4, 127.8, 125.3, 122.2. The molecular peak of **1k** was not found in the mass spectrum using different ionization methods. Instead, the structure of **1k** was identified with single crystal crystallography (Figure S45).

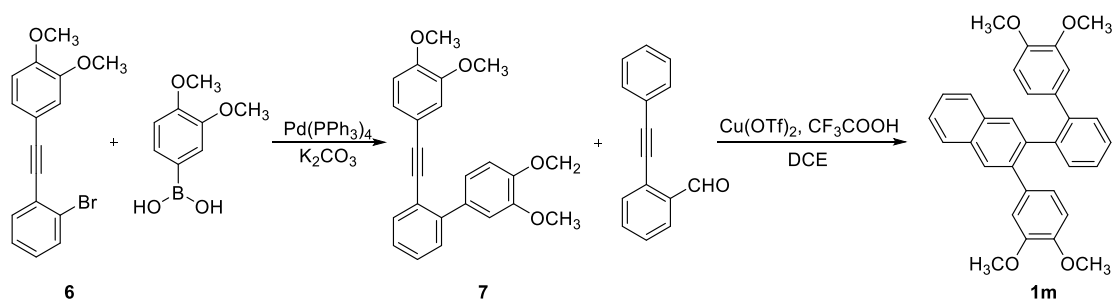

**Scheme S3.** Synthesis of **1m**.

Compound **6** and 2-(phenylethynyl)benzaldehyde were prepared according to the reported procedures.<sup>4,6</sup>

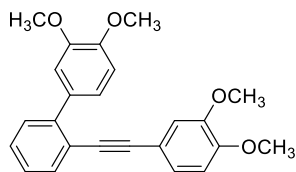

**Compound 7:** Under an atmosphere of N<sub>2</sub>, compound **6** (1.74 g, 5.49 mmol, 1 eq), 3,4-dimethoxyphenylboronic acid (1.20 g, 6.59 mmol, 1.2 eq), K<sub>2</sub>CO<sub>3</sub> (1.90 g, 13.7 mmol, 2.5 eq), and Pd(PPh<sub>3</sub>)<sub>4</sub> (634 mg, 0.55 mmol, 0.1 eq) were dissolved in a mixed solvent of 25 mL of toluene, 12.5 mL of ethanol and 12.5 mL of H<sub>2</sub>O, which was pre-bubbled with a flow of N<sub>2</sub>. The mixture was stirred at 80 °C overnight. Thereafter, the mixture was extracted with CH<sub>2</sub>Cl<sub>2</sub>, dried over Na<sub>2</sub>SO<sub>4</sub>, and concentrated under a reduced pressure. The residue was purified by column chromatography on silica gel with hexane/EA 5:1 (V/V) as eluent. 1.94 g (5.19 mmol, 94% yield) of **7** collected as white solid.

Melting point: 98-99 °C. <sup>1</sup>H NMR (400 MHz, CDCl<sub>3</sub>) δ 7.62 (d, *J* = 7.6 Hz, 1H), 7.43 – 7.28 (m, 4H), 7.17 (d, *J* = 8.0 Hz, 1H), 6.97 – 6.93 (m, 2H), 6.82 (s, 1H), 6.78 (d, *J* = 8.4 Hz, 1H), 3.93 (s, 3H), 3.87 (s, 6H), 3.85 (s, 3H). <sup>13</sup>C NMR (100 MHz, CDCl<sub>3</sub>) δ 149.6, 148.8, 148.6, 148.3, 143.6, 133.7, 132.8, 129.4, 128.4, 126.9, 124.7, 121.8, 115.8, 114.2, 113.2, 111.2, 110.9, 92.8, 88.4, 56.1, 56.0, 55.9. MS (DART): calcd. for C<sub>24</sub>H<sub>23</sub>O<sub>4</sub> ([M+H]<sup>+</sup>): 375.1591, found: 375.1588.

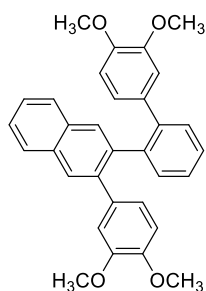

**Compound 1m:** Under a nitrogen atmosphere, Cu(OTf)<sub>2</sub> (72 mg, 0.2 mmol, 0.2 eq) was added into a 50 ml Schlenk flask. The flask was then charged with a solution of 2-(phenylethynyl)benzaldehyde (412 mg, 2.0 mmol, 2 eq) in CH<sub>2</sub>ClCH<sub>2</sub>Cl (5.0 mL) via syringe and the mixture was stirred at rt for 30 min. Thereafter, a solution of **7** (374 mg, 1.0 mmol, 1 eq) in CH<sub>2</sub>ClCH<sub>2</sub>Cl (5.0 mL) and CF<sub>3</sub>CO<sub>2</sub>H (0.15 mL, 2.0 mmol, 2 eq) was immediately added. The mixture was heated in an oil bath to 80 °C for 3 hours. The reaction mixture was extracted with CH<sub>2</sub>Cl<sub>2</sub>, the combined organic phases were dried and concentrated. Purification by column chromatography on silica gel using hexane/EA 10:1 (V/V) as eluent to obtain **1m** as light yellow solid (252 mg, 53% yield).<sup>7</sup>

Melting point: 142-144 °C. <sup>1</sup>H NMR (400 MHz, CDCl<sub>3</sub>) δ 8.00 (s, 1H), 7.90 – 7.88 (m, 1H), 7.82 – 7.80 (m, 1H), 7.63 – 7.60 (m, 2H), 7.51 – 7.36 (m, 4H), 7.18 (d, *J* = 7.6 Hz, 1H), 6.55 (d, *J* = 8.4 Hz, 1H), 6.45 (d, *J* = 8.4 Hz, 1H), 6.20 (dd, *J* = 8.0, 1.6 Hz, 1H), 6.16 – 6.13 (m, 2H), 6.05 (d, *J* = 1.2 Hz, 1H), 3.84 (s, 3H), 3.78 (s, 3H), 3.47 (s, 3H), 3.29 (s, 3H). <sup>13</sup>C NMR (100 MHz, CDCl<sub>3</sub>) δ 147.9, 147.8, 147.5, 147.4, 140.9, 140.3, 139.6, 139.3, 133.64, 133.61, 133.0, 132.6, 131.8, 130.3, 129.7, 128.2, 127.9, 127.8, 127.6, 127.1, 126.3, 126.1, 121.7, 121.6, 112.5, 112.4, 110.34, 110.28, 55.91, 55.86, 55.4, 55.1. MS (EI): calcd. for C<sub>32</sub>H<sub>28</sub>O<sub>4</sub> (M<sup>+</sup>): 476.1982, found: 476.2001.

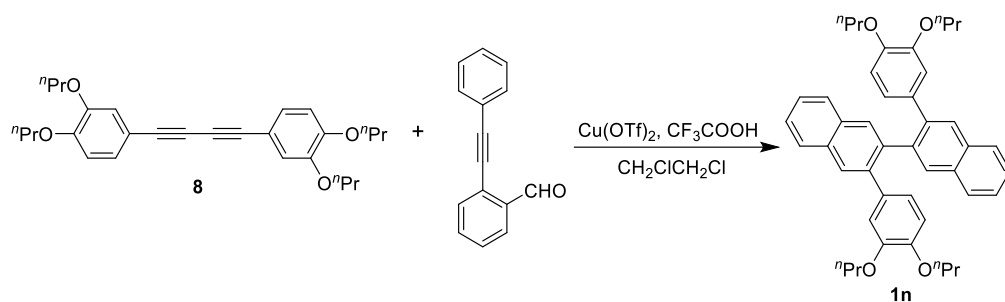

**Scheme S4.** Synthesis of **1n**.

Compound **8** and 2-(phenylethynyl)benzaldehyde were prepared according to the reported procedures.<sup>5, 6</sup>

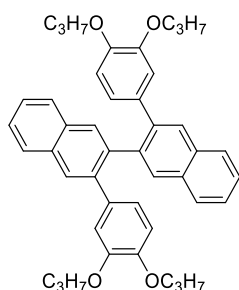

**Compound 1n:** Under a nitrogen atmosphere, Cu(OTf)<sub>2</sub> (72mg, 0.2 mmol, 0.2 eq) were added into a Schlenk flask. The flask was then charged with a solution of 2-(Phenylethynyl)benzaldehyde (618 mg, 3 mmol, 3 eq) in CH<sub>2</sub>ClCH<sub>2</sub>Cl (10 mL) via syringe and the mixture was stirred at rt for 30 min. Thereafter, the solution of **8** (1.0 mmol, 1 eq) in CH<sub>2</sub>ClCH<sub>2</sub>Cl (10 mL) and CF<sub>3</sub>CO<sub>2</sub>H (0.23 mL, 3 mmol, 3 eq) was added immediately. The mixture was heated with an oil bath to 80 °C for 1 hours. The reaction mixture was extracted with CH<sub>2</sub>Cl<sub>2</sub>, and the combined organic phases were dried and concentrated. The crude product was purified by column chromatography on silica gel using EA/hexane 1:30 (V/V) as eluent to obtain **1n** as yellow solid (364 mg, 57% yield).

Melting point: 98-100 °C. <sup>1</sup>H NMR (400 MHz, CDCl<sub>3</sub>) δ 8.11 (s, 2H), 7.93 – 7.91 (m, 2H), 7.83 – 7.81 (m, 2H), 7.63 (s, 2H), 7.53 – 7.48 (m, 4H), 6.51 (d, *J* = 8.0 Hz, 2H), 6.22 – 6.19 (m, 4H), 3.88 (t, *J* = 6.8 Hz, 4H), 3.34 (q, *J* = 7.2 Hz, 2H), 3.06 (q, *J* = 7.2 Hz, 2H), 1.85 – 1.76 (m, 4H), 1.50 – 1.39 (m, 4H), 1.02 (t, *J* = 7.6 Hz, 6H), 0.71 (t, *J* = 7.2 Hz, 6H). <sup>13</sup>C NMR (100 MHz, CDCl<sub>3</sub>) δ 148.2, 147.6, 139.7, 139.6, 133.8, 133.2, 132.7, 130.4, 128.3, 127.8, 127.6, 126.2, 126.1, 121.8, 115.1, 113.6, 71.0, 70.1, 22.8, 22.4, 10.6, 10.1. MS (DART): calcd. for C<sub>44</sub>H<sub>47</sub>O<sub>4</sub> ([M+H]<sup>+</sup>): 639.3469, found: 639.3463.

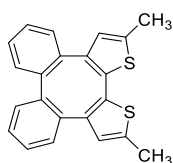

**Compound 2c**

**Method A:** To a solution of **1c** (0.0069 g, 0.02 mmol) in 18 ml of anhydrous CH<sub>2</sub>Cl<sub>2</sub>, 0.0324 g

(0.2 mmol, 10 equiv.) of  $\text{FeCl}_3$  in 1.8 ml  $\text{CH}_3\text{NO}_2$  was added under nitrogen atmosphere. The reaction mixture turned to red brown immediately, which was kept stirred at room temperature for 1.5 hours. The solution was quenched with 8 ml of MeOH, and then washed with water. The resulting solution was extracted with  $\text{CH}_2\text{Cl}_2$ . The organic layers were combined and dried over anhydrous  $\text{Na}_2\text{SO}_4$ . The solution was concentrated under a reduced pressure. The residue was further purified by plate chromatography on silica gel with  $\text{CH}_2\text{Cl}_2$ /hexane 1:10 (V/V) as eluent to afford 4.8 mg of **2c** as white solid in a yield of 70%.

Method B: To a solution of **1c** (13.8 mg, 0.04 mmol) and DDQ (27.2mg, 0.12 mmol) in 36 ml of anhydrous  $\text{CH}_2\text{Cl}_2$  at room temperature, 3.6 ml of  $\text{CH}_3\text{SO}_3\text{H}$  was added slowly. The yellow reaction system became dark immediately. The reaction was stirred for 30 minutes. Triethylamine was added to quench this reaction and the color changed to dark brown. The resulting solution was washed with water and the organic layer was collected, dried with anhydrous  $\text{Na}_2\text{SO}_4$ . After the solution being concentrated by rotary evaporation,  $\text{CH}_2\text{Cl}_2$ /hexane 1:10 (V/V) was used as eluent to further purify the crude product by plate chromatography on silica gel, yielding 8.7 mg (63%) of **2c** as white solid.

Melting point: 245-247 °C.  $^1\text{H}$  NMR (400 MHz,  $\text{CDCl}_3$ ):  $\delta$  = 7.32-7.30 (m, 4H),  $\delta$  = 7.20-7.17 (m, 2H),  $\delta$  = 7.14-7.11 (m, 2H),  $\delta$  = 6.71 (s, 2H),  $\delta$  = 2.44 (s, 6H);  $^{13}\text{C}$  NMR (100 MHz,  $\text{CDCl}_3$ ):  $\delta$  = 142.6, 141.7, 140.4, 137.2, 131.7, 129.74, 129.70, 127.9, 127.5, 127.1, 15.5; MS (APCI): calcd. for  $\text{C}_{22}\text{H}_{16}\text{S}_2$  ( $[\text{M}+\text{H}]^+$ ): 345.07662, found: 345.07654.

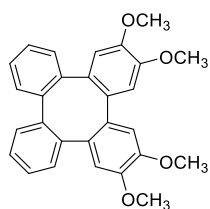

#### Compound **2d**

Method A: To a solution of **1d** (0.0085 g, 0.02 mmol) in 18 ml of anhydrous  $\text{CH}_2\text{Cl}_2$ , 0.0324 g (0.2 mmol, 10 equiv.) of  $\text{FeCl}_3$  in 1.8 ml  $\text{CH}_3\text{NO}_2$  was added under a nitrogen atmosphere. The reaction mixture, which turned red brown immediately, was kept stirred at room temperature for 1 hour. The solution was quenched with 8 ml of MeOH, and then washed with water. The resulting solution was extracted with  $\text{CH}_2\text{Cl}_2$ . The organic layer was combined together and dried over anhydrous  $\text{Na}_2\text{SO}_4$ . The solution was concentrated under a reduced pressure. The residue was purified by column chromatography on silica gel with ethyl acetate/hexane 1:2 (V/V) as eluent to afford 0.0076 g of **2d** as white solid in a yield of 90%.

Method B: To a solution of **1d** (0.0607 g, 0.142 mmol) and DDQ (0.0484 g, 0.213 mmol) in 65 ml of anhydrous  $\text{CH}_2\text{Cl}_2$  at room temperature, 6.5 ml of  $\text{CH}_3\text{SO}_3\text{H}$  was added slowly. The reaction mixture, which turned dark blue immediately, was stirred for at room temperature for 30 minutes. After triethylamine was added to the mixture to quench this reaction, the resulting dark brown solution was washed with water, and then dried with anhydrous  $\text{Na}_2\text{SO}_4$ . The solution was concentrated under a reduced pressure, and the residue was purified by column chromatography on silica gel using ethyl acetate/hexane 1:2 (V/V) as eluent to afford 0.0530 g (88%) of **2d** as white solid.

The  $^1\text{H}$  NMR spectrum is consistent with the reported one.<sup>8</sup>

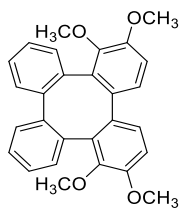

### Compound **2e**

Method A: To a solution of **1e** (0.0213 g, 0.05 mmol) in 4 ml of anhydrous CH<sub>2</sub>Cl<sub>2</sub>, 0.0811 g (0.5 mmol, 10 equiv.) of FeCl<sub>3</sub> in 0.4 ml of CH<sub>3</sub>NO<sub>2</sub> was added under a nitrogen atmosphere. The reaction mixture was kept stirred at room temperature for 20 min. The solution was quenched with MeOH, and then washed with water, and the aqueous layer was extracted with CH<sub>2</sub>Cl<sub>2</sub>. The organic layers were combined and dried over anhydrous Na<sub>2</sub>SO<sub>4</sub>. The solution was concentrated under a reduced pressure. The residue was purified by plate chromatography on silica gel with ethyl acetate/hexane 1:5 (V/V) as eluent to afford 0.0123 g of **2e** as white solid in a yield of 58%.

Method B: To a solution of **1e** (0.0212 g, 0.050 mmol) and DDQ (0.0170 g, 0.075 mmol) in 44 ml of anhydrous CH<sub>2</sub>Cl<sub>2</sub> at room temperature, 4.4 ml of CH<sub>3</sub>SO<sub>3</sub>H was added slowly. The yellow reaction mixture, which became dark gradually, was stirred at room temperature for 30 minutes. After triethylamine was added to the mixture to quench this reaction, the resulting yellow solution was washed with water and the organic layer was dried with anhydrous Na<sub>2</sub>SO<sub>4</sub>. The solution was concentrated under a reduced pressure, and the residue was purified by column chromatography on silica gel using ethyl acetate/hexane 1:4 (V/V) as eluent, yielding 0.0148 g (72%) of **2e** as white solid.

Melting point: 167-169 °C. <sup>1</sup>H NMR (400 MHz, CD<sub>2</sub>Cl<sub>2</sub>): δ = 7.31-7.28 (m, 4H), δ = 7.21 (d, *J* = 6.8 Hz, 2H), δ = 7.14 (d, *J* = 6.8 Hz, 2H), δ = 6.89-6.83 (m, 4H), δ = 3.81 (s, 6H), δ = 3.35 (s, 6H); <sup>13</sup>C NMR (100 MHz, CD<sub>2</sub>Cl<sub>2</sub>): δ = 151.8, 145.7, 142.0, 136.9, 135.6, 135.3, 130.2, 128.5, 127.4, 126.8, 124.4, 111.2, 60.0, 55.8; MS (APCI): calcd. for C<sub>28</sub>H<sub>24</sub>O<sub>4</sub> ([M+H]<sup>+</sup>): 425.17474, found: 425.17433.

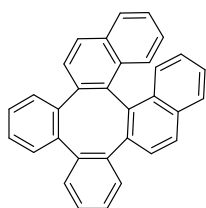

### Compound **2g**

To a solution of **1g** (40.6 mg, 0.1 mmol) in 8 ml of anhydrous CH<sub>2</sub>Cl<sub>2</sub>, 162.2 mg (1.0 mmol, 10 equiv.) of FeCl<sub>3</sub> in 0.8 ml CH<sub>3</sub>NO<sub>2</sub> was added under Ar. The reaction was stirred at room temperature for 10 minutes. The reaction mixture was quenched with H<sub>2</sub>O, and then extracted with CH<sub>2</sub>Cl<sub>2</sub>. The organic layers were combined and dried over anhydrous Na<sub>2</sub>SO<sub>4</sub>. The solution was concentrated under a reduced pressure, and the residue was purified by thin layer chromatography on silica gel using ethyl acetate/hexane 1:30 (V/V) as eluent, yielding 16.2 mg (40%) of **2g** as white solid.

Melting point: 280-281 °C. <sup>1</sup>H NMR (400 MHz, CDCl<sub>3</sub>) δ 7.85 – 7.81 (m, 4H), 7.43 – 7.35 (m, 4H), 7.33 – 7.30 (m, 2H), 7.24 – 7.20 (m, 4H), 7.19 – 7.14 (m, 4H), 6.98 (d, *J* = 8.4 Hz, 2H). <sup>13</sup>C NMR (100 MHz, CDCl<sub>3</sub>) δ 142.3, 141.8, 139.9, 135.3, 132.5, 132.4, 129.1, 128.1, 128.0,

127.9, 127.5, 127.4, 127.2, 127.0, 126.3, 125.6. MS (DART): calcd. for  $C_{32}H_{24}N$  ( $[M+NH_4]^+$ ): 422.1903, found: 422.1901.

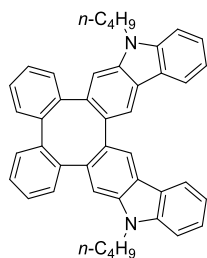

### Compound **2h**

Method A: To a solution of **1h** (0.0117 g, 0.02 mmol) in 20 ml of anhydrous  $CH_2Cl_2$ , 0.0128 g (0.08 mmol, 4 equiv.) of  $FeCl_3$  in 2 ml  $CH_3NO_2$  was added dropwise under a nitrogen atmosphere. The reaction mixture which turned green immediately, was stirred at room temperature for 1 minute. The resulting solution was quenched with 4 ml of MeOH, and washed with water. The aqueous layer was extracted with  $CH_2Cl_2$ , and the organic layers were combined and dried over anhydrous  $Na_2SO_4$ . The solution was concentrated under a reduced pressure, and the residue was purified by column chromatography on silica gel using  $CH_2Cl_2$ /hexane 1:4 (V/V) as eluent to afford 0.0090 g of **2h** as white solid in a yield of 77%.

Method B: To a solution of **1h** (0.0045 g, 0.0075 mmol) and DDQ (0.0026 g, 0.0113 mmol) in 7 ml of anhydrous  $CH_2Cl_2$  at room temperature, 0.7 ml of  $CH_3SO_3H$  was added slowly. The yellow reaction mixture, which became deep green immediately, was stirred at room temperature for 30 minutes. After triethylamine was added to the mixture to quench this reaction, the resulting yellow solution was washed with water and the organic layer was dried with anhydrous  $Na_2SO_4$ . The solution was concentrated under a reduced pressure, and the residue was purified by column chromatography on silica gel using  $CH_2Cl_2$ /hexane 1:4 (V/V) as eluent, yielding 0.0004 g (9%) of **2h** as white solid.

Melting point: 330-332 °C.  $^1H$  NMR (400 MHz,  $CD_2Cl_2$ ):  $\delta$  = 8.03 (d,  $J$  = 8 Hz, 2H),  $\delta$  = 7.97 (s, 2H),  $\delta$  = 7.45-7.41 (m, 4H),  $\delta$  = 7.35-7.30 (m, 6H),  $\delta$  = 7.25 (s, 2H),  $\delta$  = 7.23-7.18 (m, 4H),  $\delta$  = 4.29 (t,  $J$  = 8 Hz, 4H),  $\delta$  = 1.88-1.83 (m, 4H),  $\delta$  = 1.44-1.39 (m, 4H),  $\delta$  = 0.95 (t,  $J$  = 7.6 Hz, 6H);  $^{13}C$  NMR (100 MHz,  $CD_2Cl_2$ ):  $\delta$  = 143.3, 142.4, 141.4, 140.3, 140.0, 134.0, 129.7, 129.4, 127.7, 127.5, 126.0, 122.9, 122.3, 121.7, 120.7, 119.2, 109.3, 109.2, 43.4, 31.5, 20.9, 14.1; MS (APCI): calcd. for  $C_{44}H_{38}N_2$  ( $[M+H]^+$ ): 595.31078, found: 595.31032.

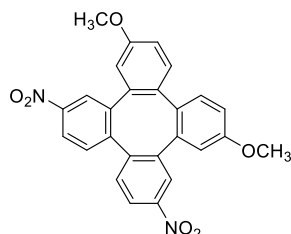

### Compound **2j**

To a solution of **1j** (11.4 mg, 0.025 mmol) and DDQ (17 mg, 0.075 mmol) in 2 ml of anhydrous  $CH_2Cl_2$  under an atmosphere of argon, 0.066 ml of TfOH was added. After being stirred at room temperature for 5 minutes, the reaction mixture was quenched with a saturated aqueous

solution of Na<sub>2</sub>CO<sub>3</sub> and extracted with CH<sub>2</sub>Cl<sub>2</sub>. The combined organic phases were dried over anhydrous Na<sub>2</sub>SO<sub>4</sub> and concentrated under a reduced pressure. The residue was purified by thin layer chromatography on silica gel using ethyl acetate/hexane 1:7 (V/V) as eluent, yielding 4.7 mg (41%) of **2j** as yellow solid.

Melting point: 278-279 °C. <sup>1</sup>H NMR (400 MHz, CDCl<sub>3</sub>) δ 8.18 (dd, J = 8.4, 2.4 Hz, 2H), 8.09 (d, J = 2.4 Hz, 2H), 7.33 (d, J = 8.4 Hz, 2H), 7.11 (d, J = 8.4 Hz, 2H), 6.89 (dd, J = 6.0, 2.4 Hz, 2H), 6.70 (d, J = 2.4 Hz, 2H), 3.79 (s, 6H). <sup>13</sup>C NMR (100 MHz, CDCl<sub>3</sub>) δ 159.1, 147.8, 146.0, 143.2, 139.8, 132.9, 131.1, 129.9, 124.3, 122.6, 114.4, 114.3, 55.5. MS (DART): calcd. for C<sub>26</sub>H<sub>18</sub>O<sub>6</sub>N<sub>2</sub> (M<sup>+</sup>):454.1159, found: 454.1162.

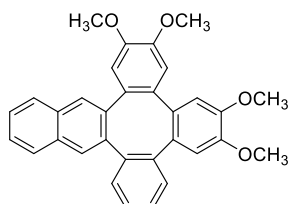

### Compound **2m**

Method B: To a solution of **1m** (11.9 mg, 0.025 mmol) and DDQ (17 mg, 0.075 mmol) in 5 ml of anhydrous CH<sub>2</sub>Cl<sub>2</sub> under an atmosphere of argon, 0.049 ml of CH<sub>3</sub>SO<sub>3</sub>H was added. The reaction mixture, which was cooled with an ice-salt bath, was stirred for 2 minutes. It was quenched with a saturated aqueous solution of Na<sub>2</sub>CO<sub>3</sub> and extracted with CH<sub>2</sub>Cl<sub>2</sub>. The combined organic phases were dried over anhydrous Na<sub>2</sub>SO<sub>4</sub>, and concentrated under a reduced pressure. The residue was purified by thin layer chromatography on silica gel using ethyl acetate/hexane 1:3 (V/V) as eluent, yielding 4.8 mg (41%) of **2m** as white solid and 2.4 mg (21%) of **3m** as yellow solid.

Melting point: 153-154 °C. <sup>1</sup>H NMR (600 MHz, CDCl<sub>3</sub>) δ 7.82 – 7.80 (m, 2H), 7.65 (d, J = 8.4 Hz, 2H), 7.47 – 7.44 (m, 2H), 7.35 – 7.31 (m, 2H), 7.28 – 7.27 (m, 1H), 7.23 – 7.21 (m, 1H), 6.78 (s, 1H), 6.71 (s, 1H), 6.69 (s, 1H), 6.68 (s, 1H), 3.87 (s, 3H), 3.86 (s, 3H), 3.82 (s, 3H), 3.81 (s, 3H). <sup>13</sup>C NMR (150 MHz, CDCl<sub>3</sub>) δ 148.21, 148.19, 148.1, 148.0, 142.02, 141.96, 141.0, 140.6, 134.1, 134.0, 133.6, 132.7, 132.6, 129.7, 129.3, 128.1, 127.9, 127.8, 127.7, 127.5, 127.3, 126.2, 126.1, 112.8, 112.4, 56.2, 56.12, 56.10, 56.06. MS (DART): calcd. for C<sub>32</sub>H<sub>27</sub>O<sub>4</sub> ([M+H]<sup>+</sup>): 475.1904, found: 475.1905.

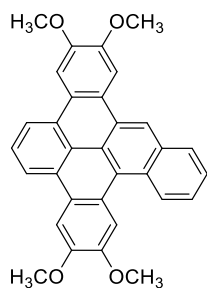

### Compound **3m**

Method A: To a solution of **1m** (11.9 mg, 0.025 mmol) in 10 ml of anhydrous CH<sub>2</sub>Cl<sub>2</sub>, 41 mg (0.25 mmol, 10 equiv.) of FeCl<sub>3</sub> in 0.2 ml CH<sub>3</sub>NO<sub>2</sub> was added under an atmosphere of argon. After being stirred at 0 °C for 5 minutes, the reaction mixture was quenched with H<sub>2</sub>O and extracted with CH<sub>2</sub>Cl<sub>2</sub>. The organic layers were combined together and dried over anhydrous

Na<sub>2</sub>SO<sub>4</sub>. The solution was concentrated under a reduced pressure. The residue was purified by thin layer chromatography on silica gel using CH<sub>2</sub>Cl<sub>2</sub>/hexane 2:1 (V/V), yielding 9.2 mg (78%) of **3m** as off-white solid.

Melting point: 185-186 °C. <sup>1</sup>H NMR (400 MHz, CDCl<sub>3</sub>) δ 9.17 (d, J = 8.0 Hz, 1H), 8.95 (s, 1H), 8.70 (d, J = 8.0 Hz, 1H), 8.59 (d, J = 8.0 Hz, 1H), 8.51 (s, 1H), 8.30 (d, J = 7.6 Hz, 1H), 8.20 – 8.19 (m, 2H), 8.04 (s, 1H), 7.99 (t, J = 8.0 Hz, 1H), 7.72 – 7.64 (m, 2H), 4.23 (s, 3H), 4.22 (s, 3H), 4.18 (s, 3H), 4.12 (s, 3H). <sup>13</sup>C NMR (100 MHz, CDCl<sub>3</sub>) δ 149.7, 149.6, 149.0, 148.4, 132.4, 129.4, 129.1, 128.7, 127.5, 127.3, 127.0, 126.2, 126.1, 125.8, 125.6, 124.8, 124.33, 124.30, 124.1, 123.0, 122.2, 119.9, 119.8, 119.5, 111.4, 105.1, 105.0, 104.8, 56.2, 56.14, 56.12, 56.0. MS (DART): calcd. for C<sub>32</sub>H<sub>25</sub>O<sub>4</sub> ([M+H]<sup>+</sup>): 473.1747, found: 473.1749.

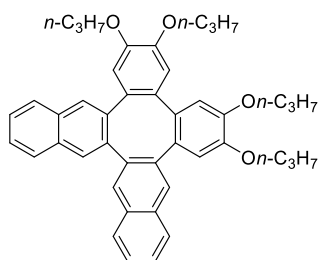

### Compound **2n**

Method B: To a solution of **1n** (16mg, 0.025 mmol) and DDQ (17 mg, 0.075 mmol) in 5 ml of anhydrous CH<sub>2</sub>Cl<sub>2</sub> under an atmosphere of argon, 0.049 ml of CH<sub>3</sub>SO<sub>3</sub>H was added. The reaction mixture, which was cooled with an ice-salt bath, was stirred for 2 minutes. It was quenched with a saturated aqueous solution of Na<sub>2</sub>CO<sub>3</sub> and extracted with CH<sub>2</sub>Cl<sub>2</sub>. The combined organic phases were combined, dried over anhydrous Na<sub>2</sub>SO<sub>4</sub>, and concentrated under a reduced pressure. The residue was purified by thin layer chromatography on silica gel using CH<sub>2</sub>Cl<sub>2</sub>/hexane 1:1 (V/V) as eluent, yielding 12.8 mg (81%) of **2n** as white solid.

Melting point: 117-118 °C. <sup>1</sup>H NMR (400 MHz, CDCl<sub>3</sub>) δ 7.85 - 7.81 (m, 4H), 7.72 (s, 2H), 7.66 (s, 2H), 7.49 – 7.44 (m, 4H), 6.78 (s, 2H), 6.72 (s, 2H), 3.99 – 3.94 (m, 4H), 3.91 – 3.83 (m, 4H), 1.84 – 1.74 (m, 8H), 0.99 (q, J = 7.2 Hz, 12H). <sup>13</sup>C NMR (100 MHz, CDCl<sub>3</sub>) δ 148.4, 148.2, 141.0, 140.9, 134.15, 134.07, 132.8, 132.6, 128.2, 127.9, 127.8, 127.7, 126.1, 126.0, 115.2, 115.0, 71.0, 70.9, 22.82, 22.78, 10.63, 10.62. MS (DART): calcd. for C<sub>44</sub>H<sub>44</sub>O<sub>4</sub> (M<sup>+</sup>): 636.3234, found: 636.3237.

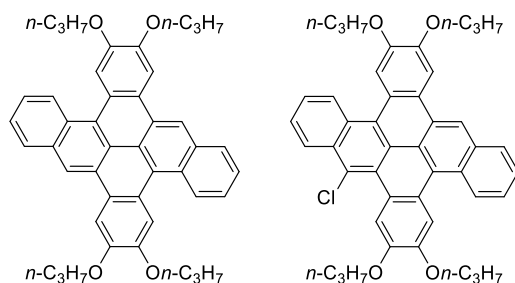

### Compounds **3n** and **3n-Cl**

Method A: To a solution of **1n** (16 mg, 0.025 mmol) in 10 ml of anhydrous CH<sub>2</sub>Cl<sub>2</sub> under an atmosphere of argon, 41 mg (0.25 mmol, 10 equiv.) of FeCl<sub>3</sub> in 0.2 ml CH<sub>3</sub>NO<sub>2</sub> was added. After being stirred at 0 °C for 5 minutes, the reaction mixture was quenched with H<sub>2</sub>O. The

resulting solution was extracted with CH<sub>2</sub>Cl<sub>2</sub>. The organic layers were combined and dried over anhydrous Na<sub>2</sub>SO<sub>4</sub>. The solution was then concentrated under a reduced pressure. The residue was purified by thin layer chromatography on silica gel using CH<sub>2</sub>Cl<sub>2</sub>/hexane 1:1 (V/V) as eluent, yielding 6.6 mg (41%) of **3n** as yellow solid and 4.2 mg (25%) of **3n-Cl** as yellow solid.

#### Compound **3n**

Melting point: 257-258 °C. <sup>1</sup>H NMR (600 MHz, CDCl<sub>3</sub>) δ 9.03 (d, J = 8.4 Hz, 2H), 8.91 (s, 2H), 8.29 – 8.26 (m, 6H), 7.65 – 7.59 (m, 4H), 4.36 (t, J = 6.6 Hz, 4H), 4.18 (t, J = 6.6 Hz, 4H), 2.10 – 2.04 (m, 4H), 2.02 – 1.96 (m, 4H), 1.22 (t, J = 7.2 Hz, 6H), 1.15 (t, J = 7.2 Hz, 6H). <sup>13</sup>C NMR (150 MHz, CDCl<sub>3</sub>) δ 149.4, 148.8, 133.0, 128.9, 127.6, 127.3, 127.2, 126.0, 125.7, 125.6, 125.2, 124.7, 123.5, 119.5, 114.3, 108.3, 71.2, 71.1, 23.0, 22.9, 10.9, 10.7. MS (MALDI): calcd. for C<sub>44</sub>H<sub>42</sub>O<sub>4</sub> (M<sup>+</sup>): 634.3078, found: 634.3075.

#### Compound **3n-Cl**

Melting point: 227-229 °C. <sup>1</sup>H NMR (400 MHz, CDCl<sub>3</sub>) δ 9.06 (d, J = 8.4 Hz, 1H), 9.00 – 8.96 (m, 2H), 8.86 – 8.83 (m, 2H), 8.23 (dd, J = 6.4, 3.2 Hz, 1H), 8.16 (s, 1H), 8.15 (s, 2H), 7.75 (t, J = 7.6 Hz, 1H), 7.67 – 7.62 (m, 3H), 4.34 (t, J = 6.4 Hz, 2H), 4.27 (t, J = 6.4 Hz, 2H), 4.16 (t, J = 6.4 Hz, 4H), 2.10 – 1.92 (m, 8H), 1.23 – 1.10 (m, 12H). <sup>13</sup>C NMR (100 MHz, CDCl<sub>3</sub>) δ 149.5, 148.64, 148.62, 146.9, 133.2, 130.8, 128.8, 128.6, 127.2, 127.1, 126.85, 126.80, 126.6, 126.4, 126.1, 125.9, 125.8, 125.7, 125.5, 125.4, 125.3, 125.25, 125.23, 124.3, 123.7, 123.6, 123.5, 119.6, 114.4, 114.3, 113.4, 108.1, 71.02, 70.97, 70.9, 70.8, 22.9, 22.8, 22.72, 22.71, 10.9, 10.8, 10.72, 10.71. MS (MALDI): calcd. for C<sub>44</sub>H<sub>41</sub>O<sub>4</sub>Cl (M<sup>+</sup>): 668.2688, found: 668.2685.

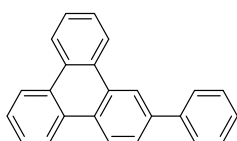

#### Compound **4l**

To a solution of **1l** (7.7 mg, 0.025 mmol) and DDQ (17 mg, 0.075 mmol) in 2 ml of anhydrous CH<sub>2</sub>Cl<sub>2</sub> under an atmosphere of argon, 0.066 ml of TfOH was added. After being stirred at room temperature for 10 minutes, the reaction mixture was quenched with a saturated aqueous solution of Na<sub>2</sub>CO<sub>3</sub> and extracted with CH<sub>2</sub>Cl<sub>2</sub>. The combined organic phases were dried over anhydrous Na<sub>2</sub>SO<sub>4</sub> and concentrated under a reduced pressure. The residue was purified by thin layer chromatography on silica gel using hexane as eluent, yielding 0.8 mg (11%) of **4l** as white solid.

The <sup>1</sup>H NMR spectrum is consistent with the reported one.<sup>9</sup>

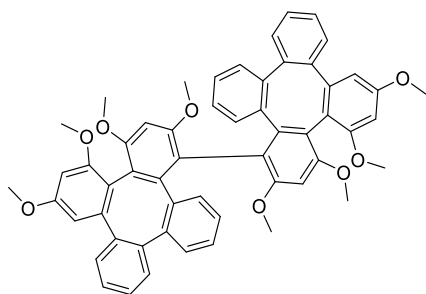

### Compound 5

To a solution of **1f** (0.0355 g, 0.08 mmol) in 5 ml of anhydrous  $\text{CH}_2\text{Cl}_2$ , 0.063 g (0.23 mmol, 2.7 equiv.) of  $\text{MoCl}_5$  was added under a nitrogen atmosphere. The reaction mixture, which turned dark gradually, was stirred at room temperature for 40 min. After being quenched with a saturated  $\text{NaHCO}_3$  aqueous solution, the reaction mixture was washed with water. The aqueous layer was extracted with  $\text{CH}_2\text{Cl}_2$ , and the organic layers were combined and dried over anhydrous  $\text{Na}_2\text{SO}_4$ . The solution was concentrated under a reduced pressure. The residue was further purified by column chromatography on silica gel with ethyl acetate /hexane 1:1 (V/V) as eluent to afford 0.0092 g of **5** as white solid in a yield of 26%.

Melting point: 334-336 °C.  $^1\text{H}$  NMR (400 MHz,  $\text{CD}_2\text{Cl}_2$ ):  $\delta$  = 7.36-7.31 (m, 4H),  $\delta$  = 7.28-7.23 (m, 4H),  $\delta$  = 7.06 (t,  $J$  = 7.2 Hz, 2H),  $\delta$  = 7.02-6.97 (m, 4H),  $\delta$  = 6.87 (t,  $J$  = 7.6 Hz, 2H),  $\delta$  = 6.42 (d,  $J$  = 2.4 Hz, 2H),  $\delta$  = 6.29 (d,  $J$  = 2.4 Hz, 2H),  $\delta$  = 6.04 (s, 2H),  $\delta$  = 3.76 (s, 12H),  $\delta$  = 3.55 (s, 6H),  $\delta$  = 3.31 (s, 6H);  $^{13}\text{C}$  NMR (100 MHz,  $\text{CD}_2\text{Cl}_2$ ):  $\delta$  = 159.7, 158.5, 157.9, 156.9, 143.9, 143.0, 142.8, 142.7, 142.6, 139.7, 129.9, 129.8, 128.1, 127.7, 127.4, 127.2, 126.1, 125.6, 120.1, 119.3, 117.5, 105.1, 97.9, 95.9, 56.8, 56.5, 55.9, 55.6; MS (APCI): calcd. for  $\text{C}_{56}\text{H}_{46}\text{O}_8$  ( $[\text{M}+\text{H}]^+$ ): 847.32654, found: 847.32618.

## 2. NMR spectra

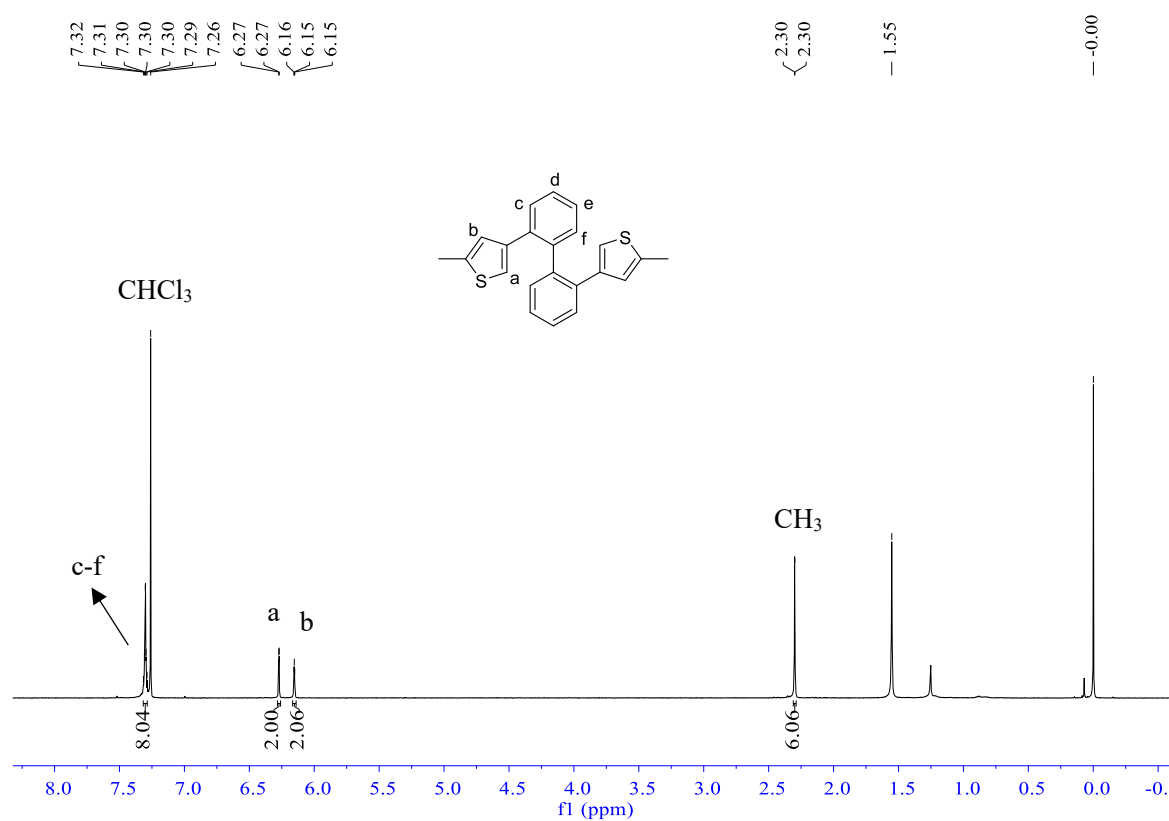

**Figure S1** <sup>1</sup>H NMR spectrum of **1c** (400 MHz, CDCl<sub>3</sub>)

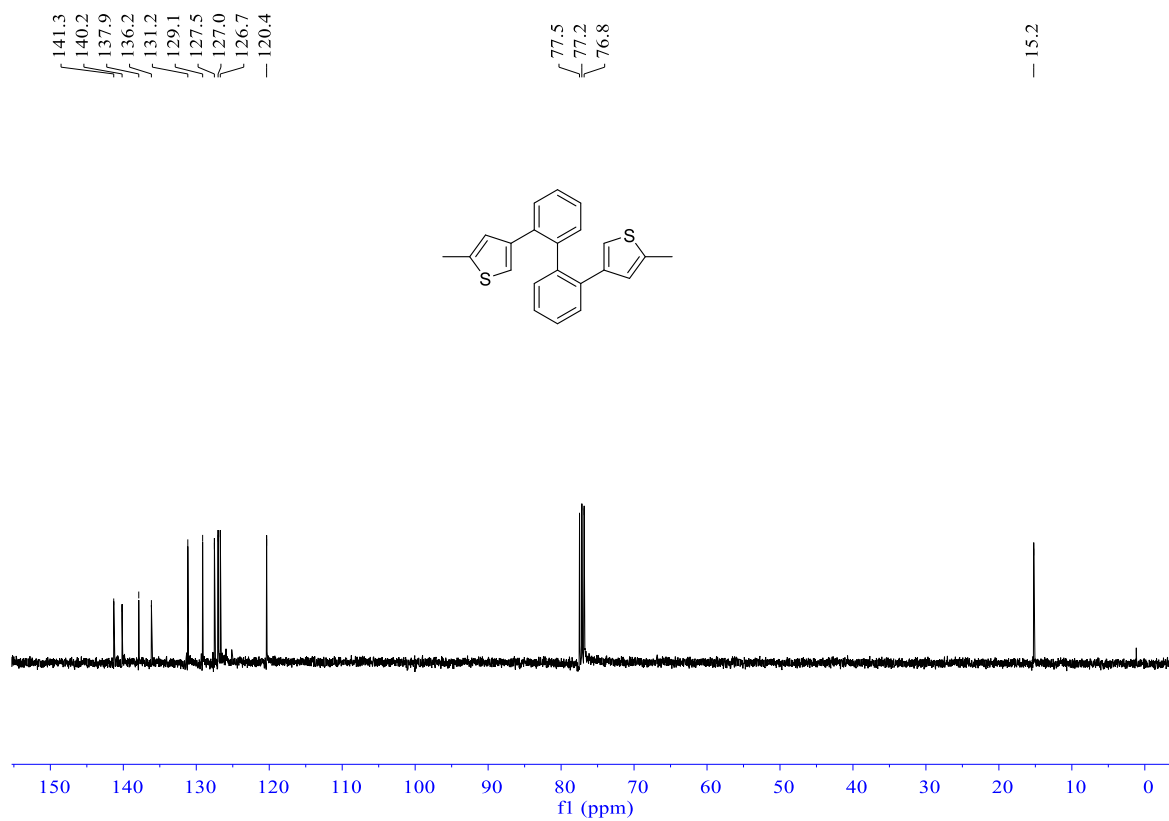

**Figure S2** <sup>13</sup>C NMR spectrum of **1c** (100 MHz, CDCl<sub>3</sub>)

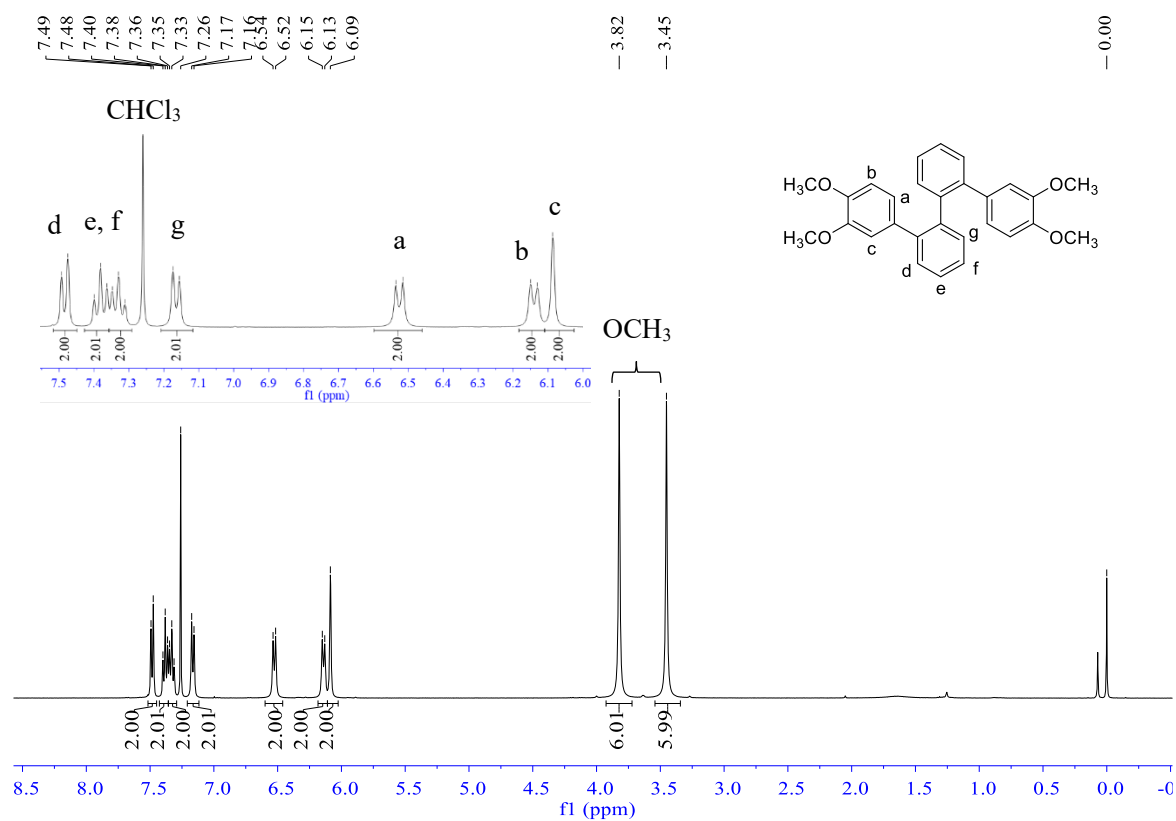

**Figure S3** <sup>1</sup>H NMR spectrum of **1d** (400 MHz, CDCl<sub>3</sub>)

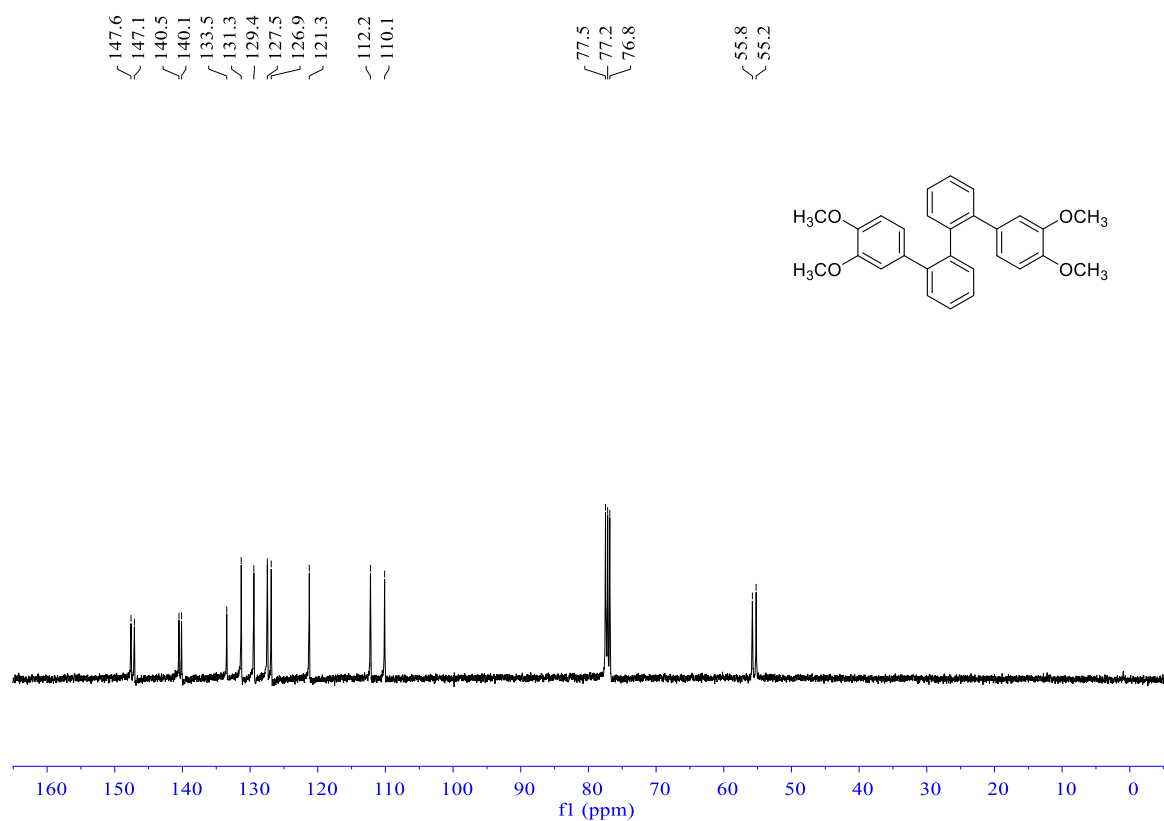

**Figure S4** <sup>13</sup>C NMR spectrum of **1d** (100 MHz, CDCl<sub>3</sub>)

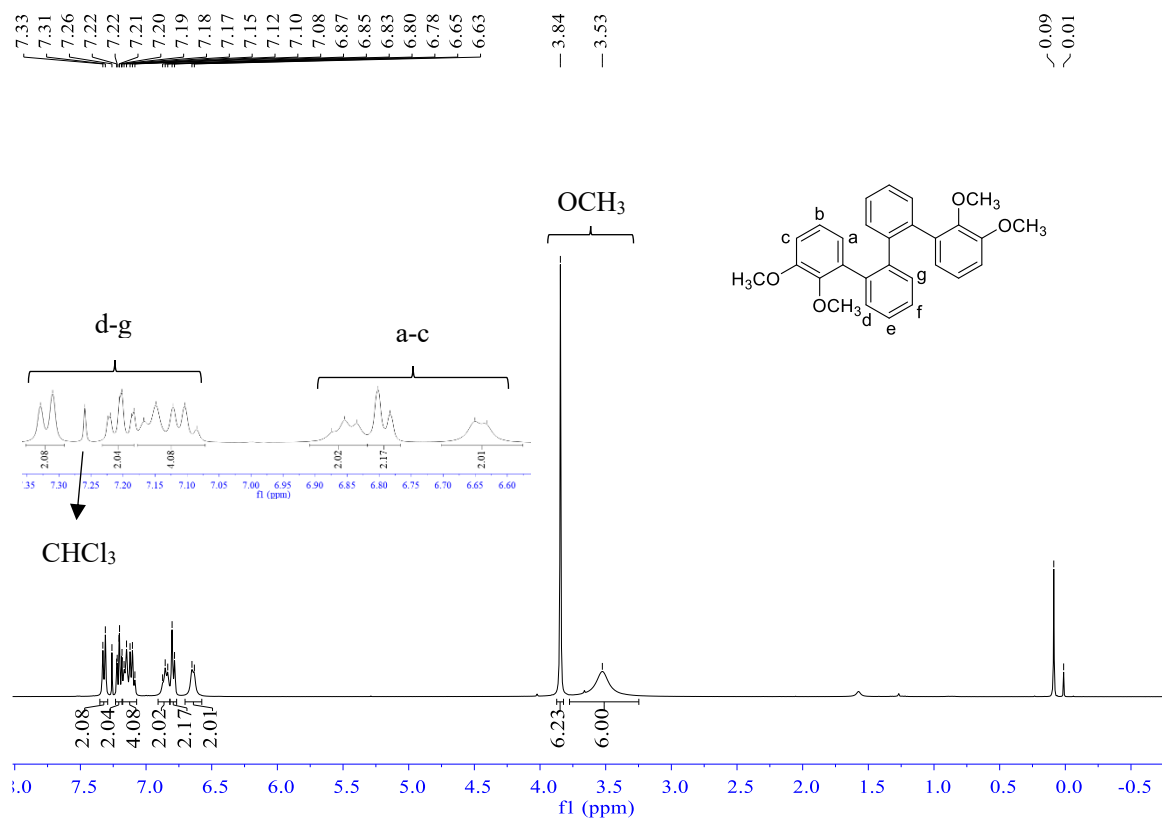

**Figure S5** <sup>1</sup>H NMR spectrum of **1e** (400 MHz, CDCl<sub>3</sub>)

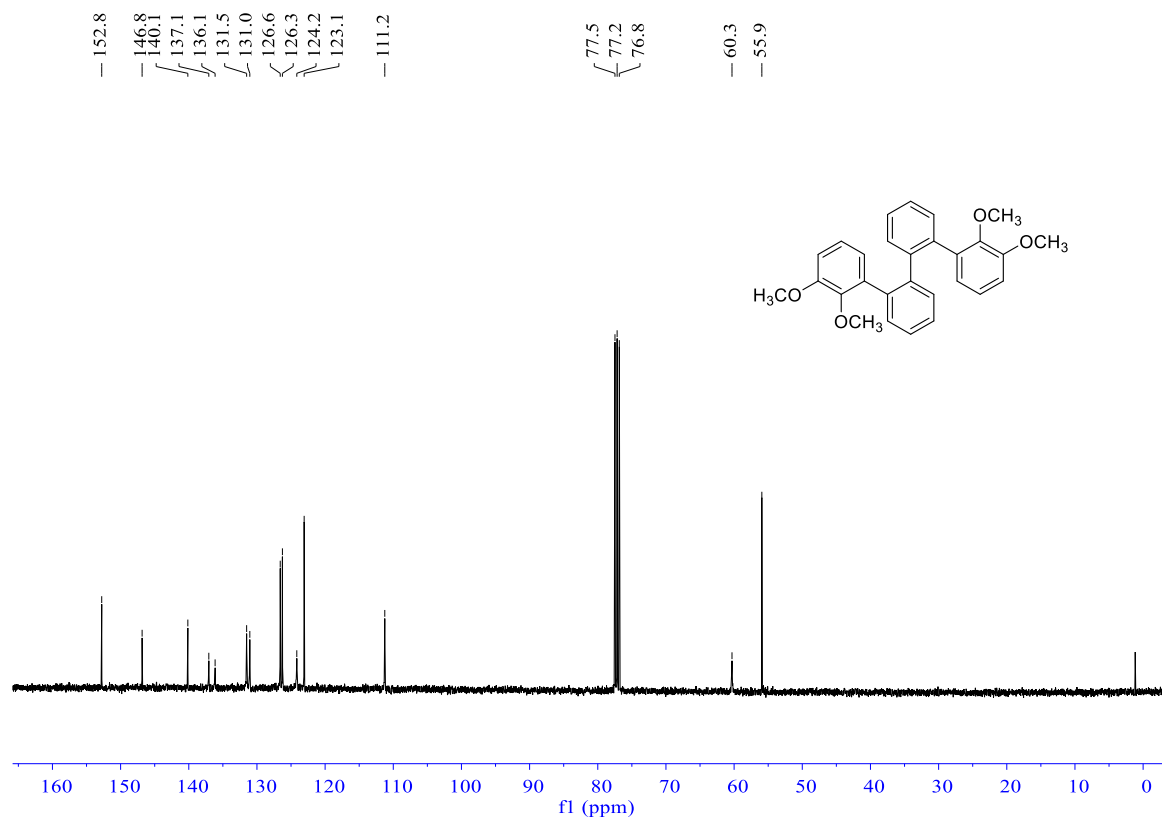

**Figure S6** <sup>13</sup>C NMR spectrum of **1e** (100 MHz, CDCl<sub>3</sub>)

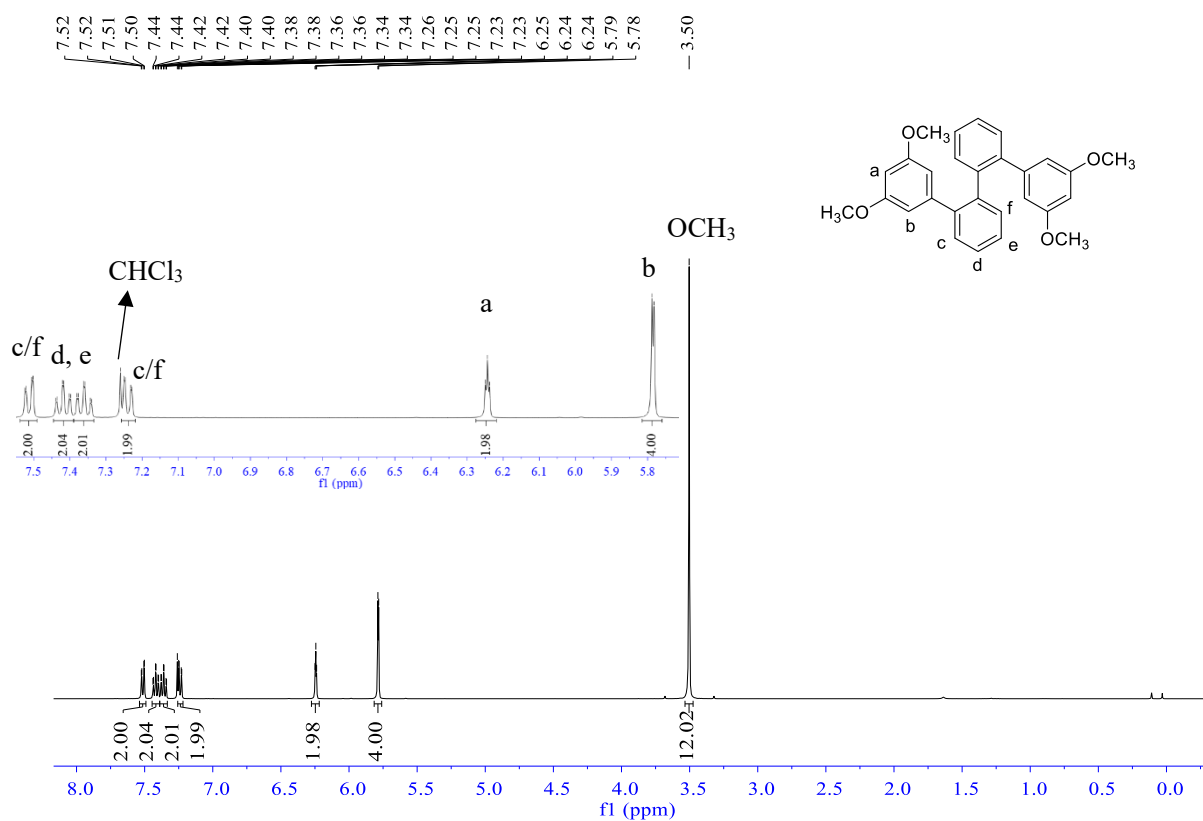

**Figure S7** <sup>1</sup>H NMR spectrum of **1f** (400 MHz, CDCl<sub>3</sub>)

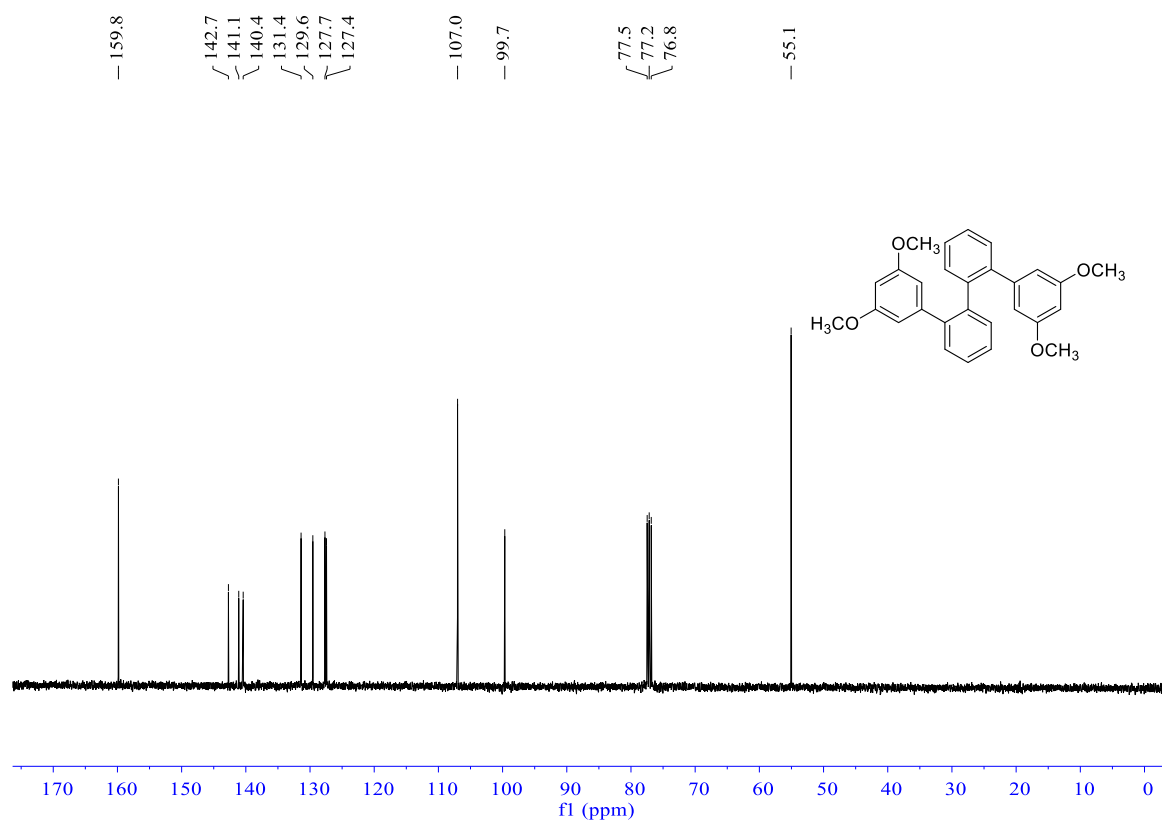

**Figure S8** <sup>13</sup>C NMR spectrum of **1f** (100 MHz, CDCl<sub>3</sub>)

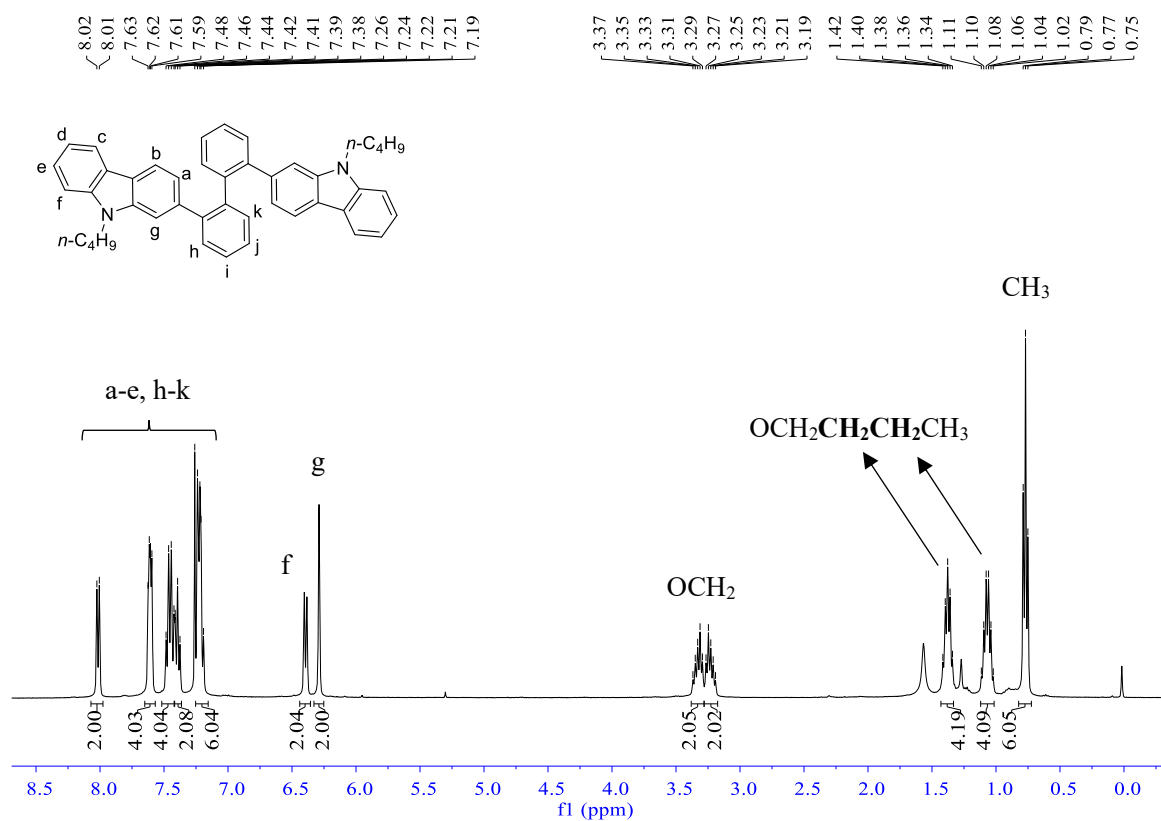

**Figure S9**  $^1\text{H}$  NMR spectrum of **1h** (400 MHz,  $\text{CDCl}_3$ )

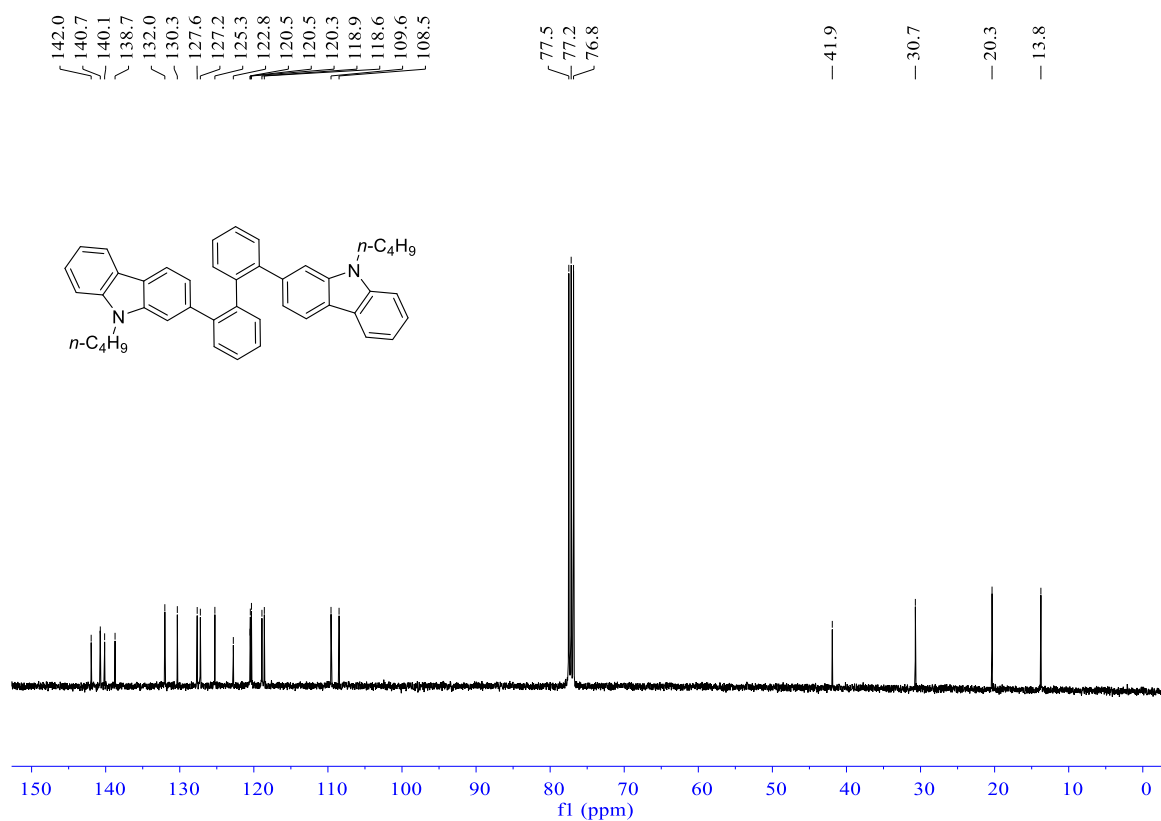

**Figure S10**  $^{13}\text{C}$  NMR spectrum of **1h** (100 MHz,  $\text{CDCl}_3$ )

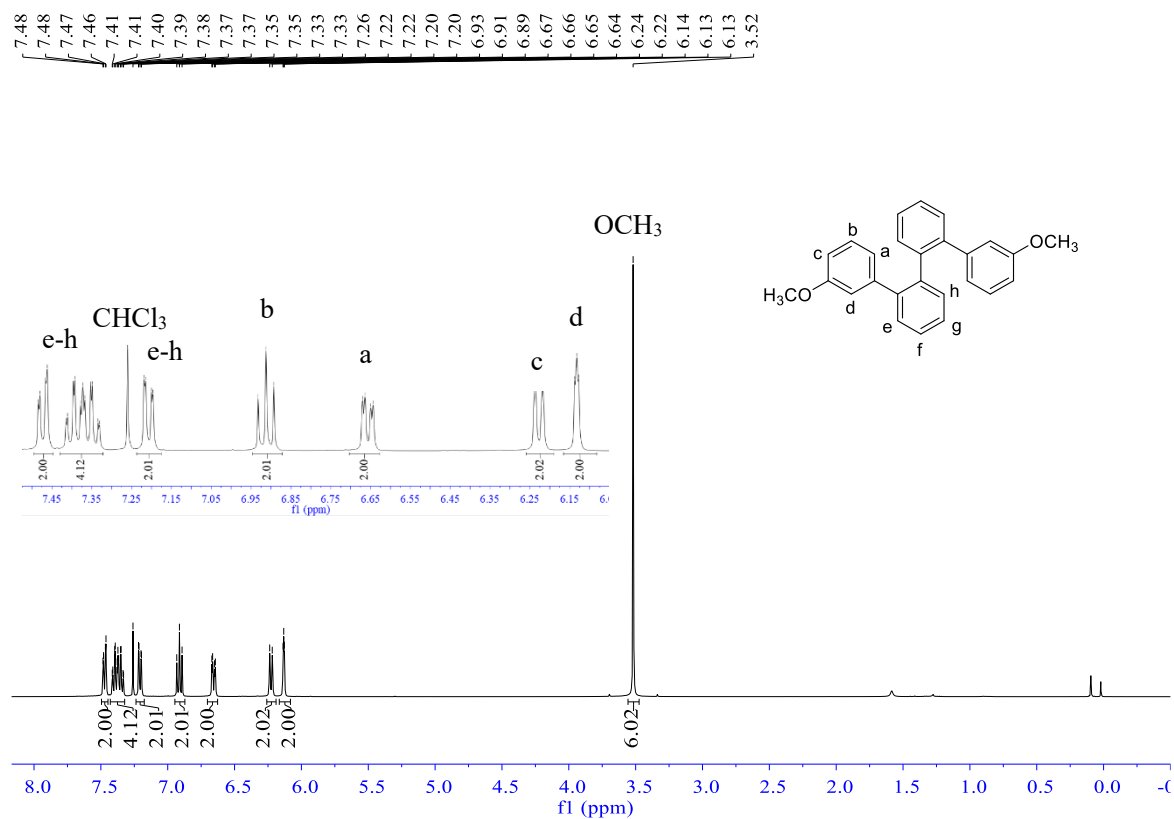

**Figure S11**  $^1\text{H}$  NMR spectrum of **1i** (400 MHz,  $\text{CDCl}_3$ )

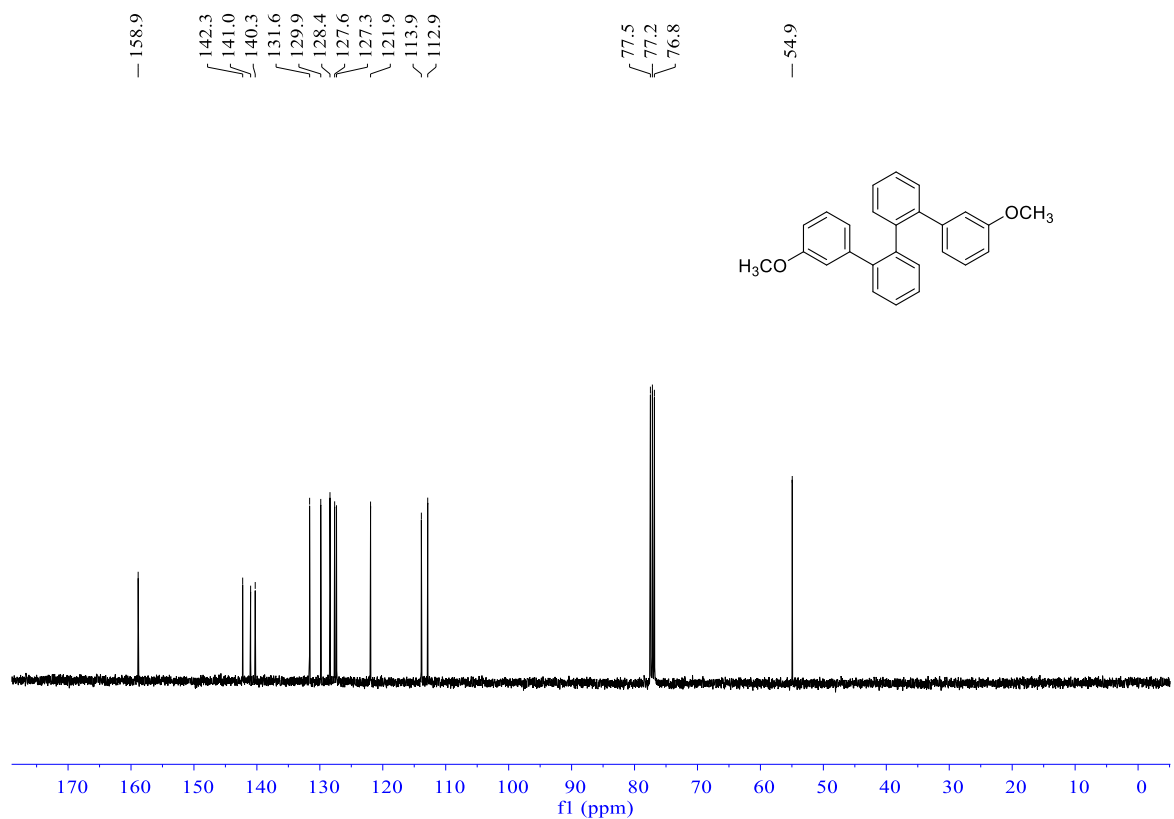

**Figure S12**  $^{13}\text{C}$  NMR spectrum of **1i** (100 MHz,  $\text{CDCl}_3$ )

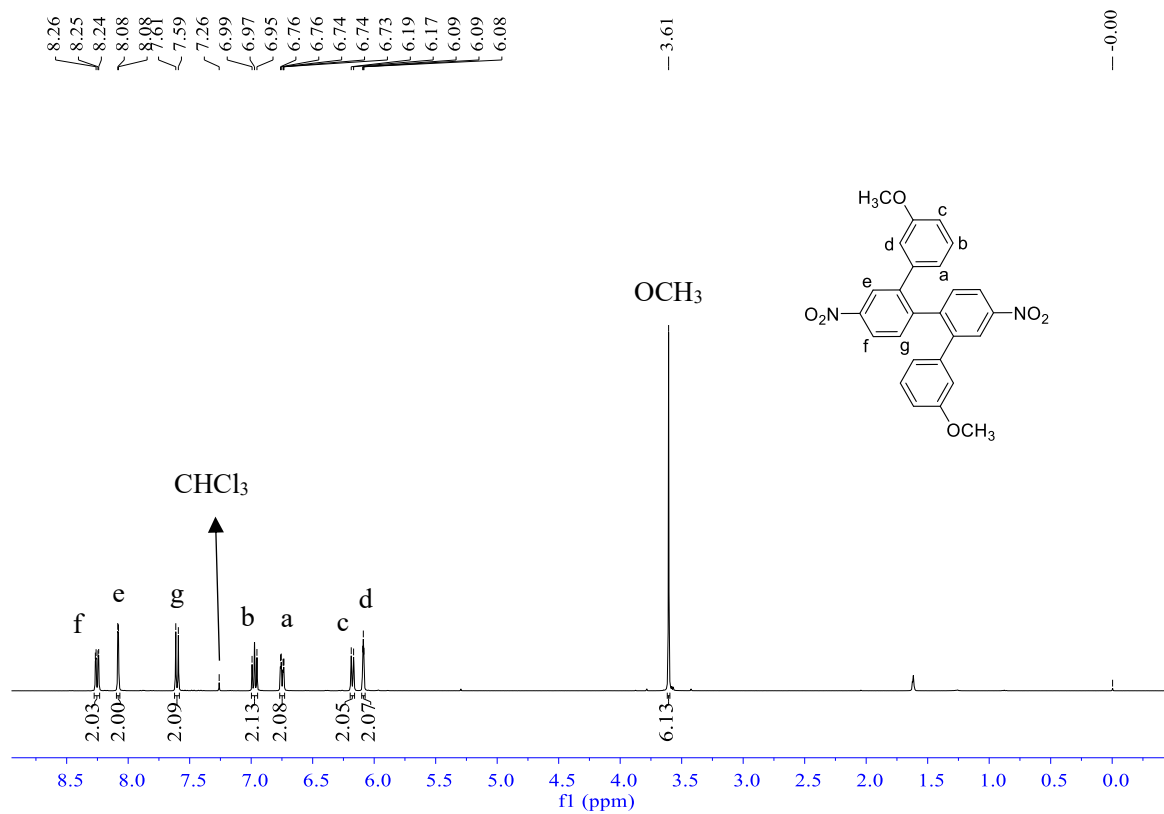

**Figure S13** <sup>1</sup>H NMR spectrum of **1j** (400 MHz, CDCl<sub>3</sub>)

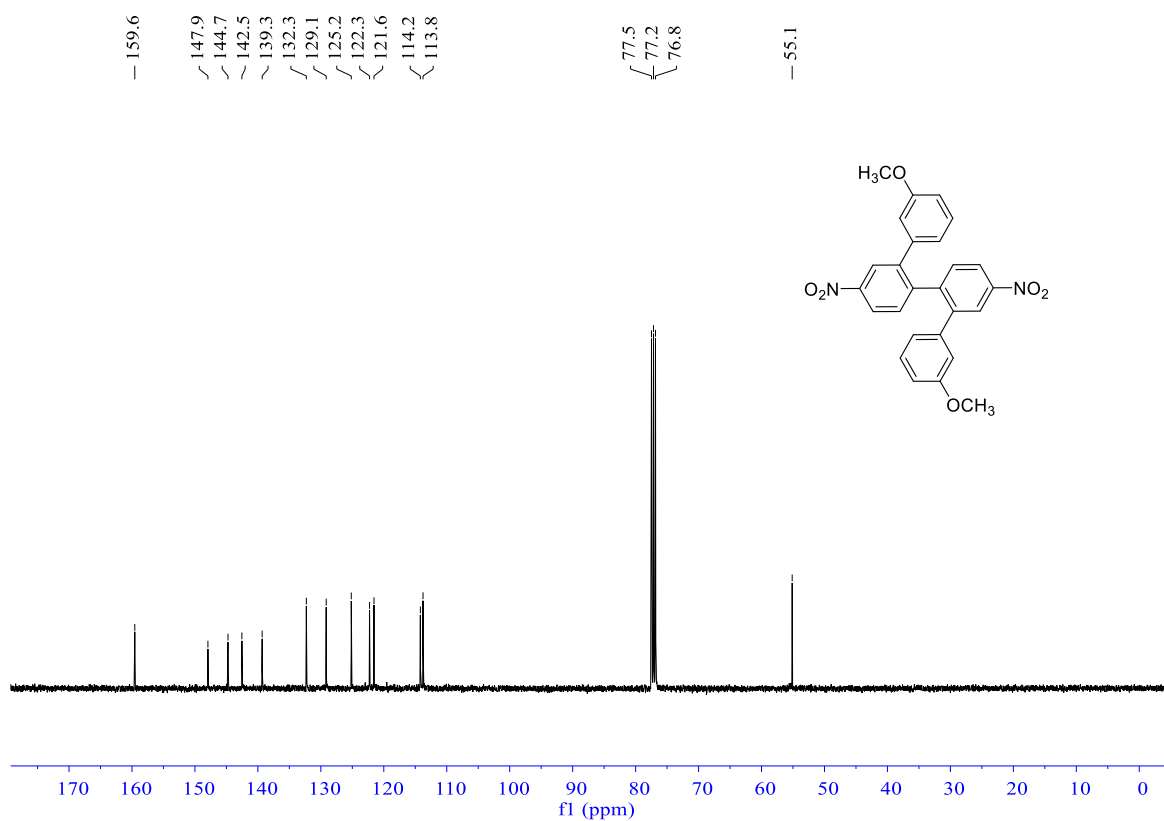

**Figure S14** <sup>13</sup>C NMR spectrum of **1j** (100 MHz, CDCl<sub>3</sub>)

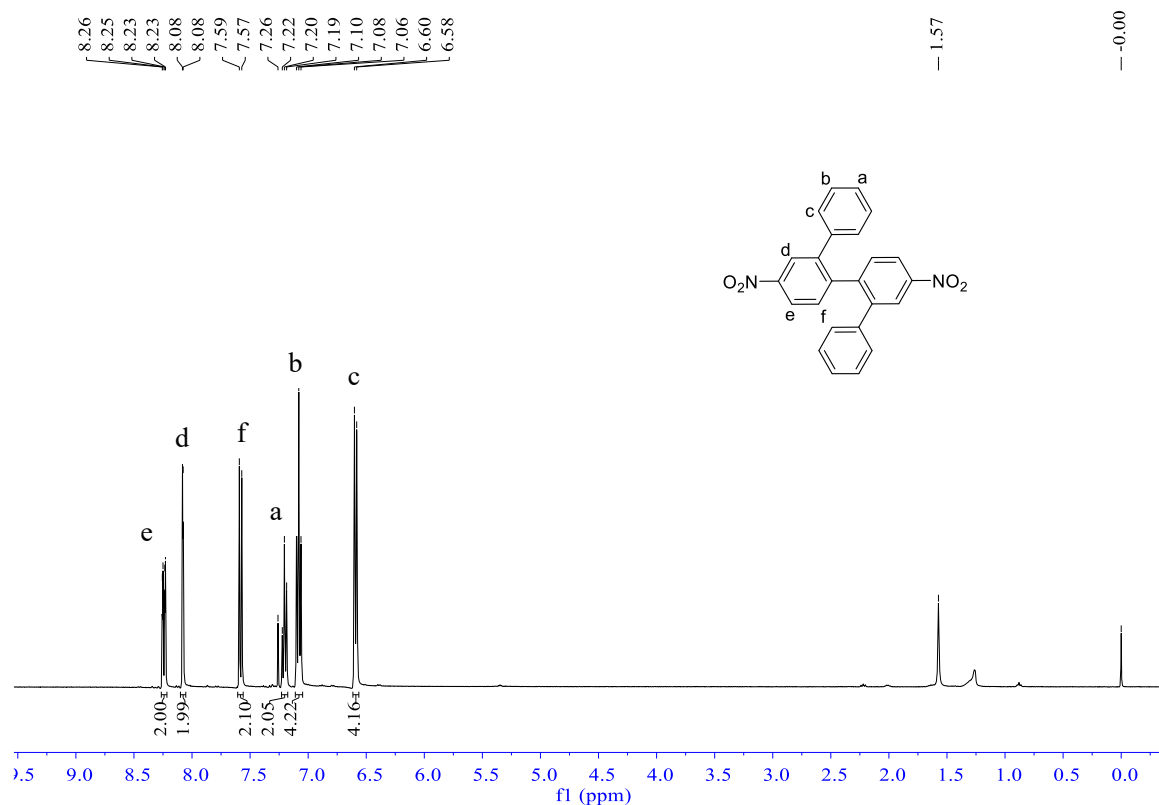

**Figure S15** <sup>1</sup>H NMR spectrum of **1k** (400 MHz, CDCl<sub>3</sub>)

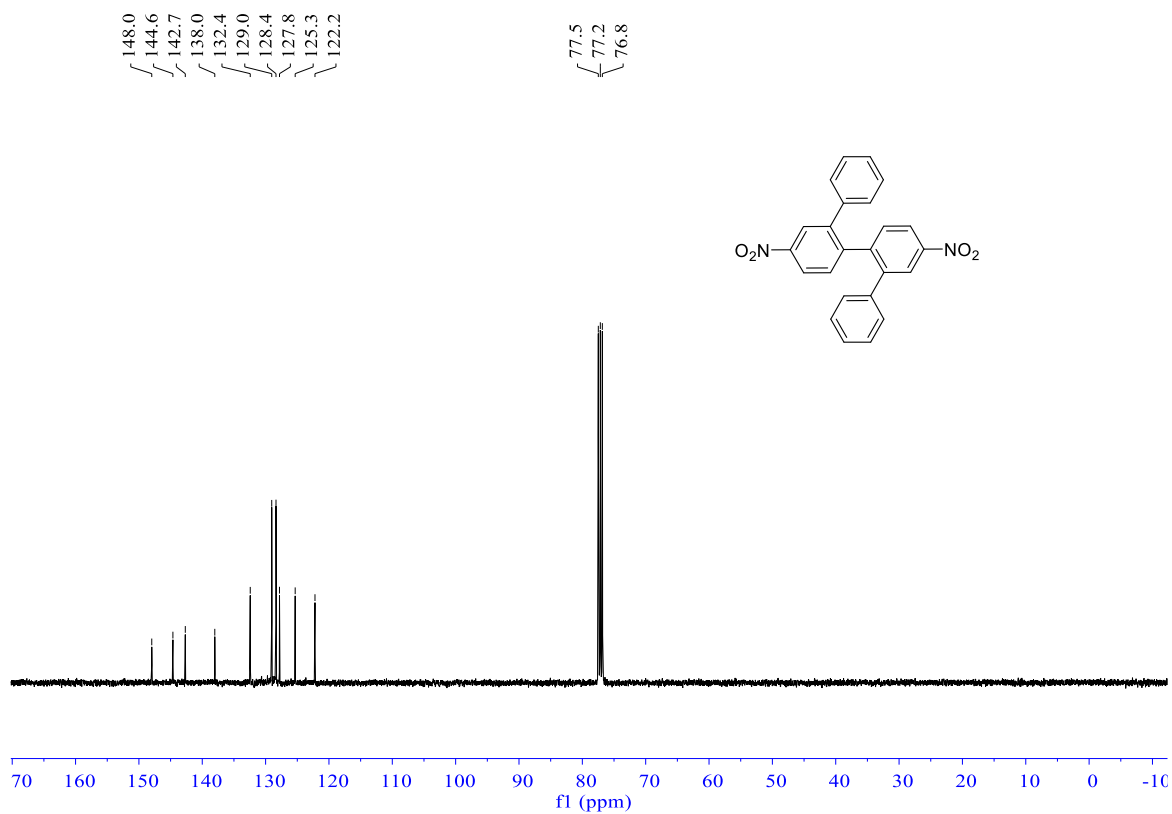

**Figure S16** <sup>13</sup>C NMR spectrum of **1k** (100 MHz, CDCl<sub>3</sub>)

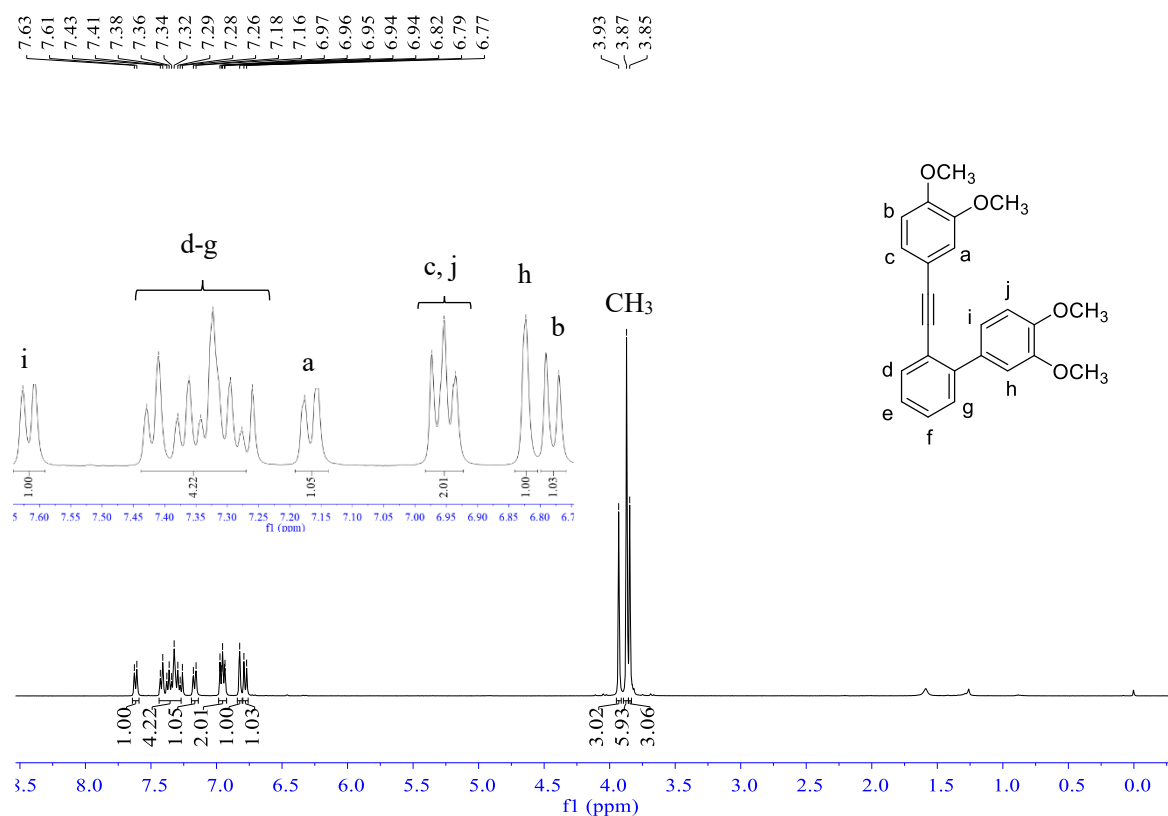

**Figure S17**  $^1\text{H}$  NMR spectrum of **7** (400 MHz,  $\text{CDCl}_3$ )

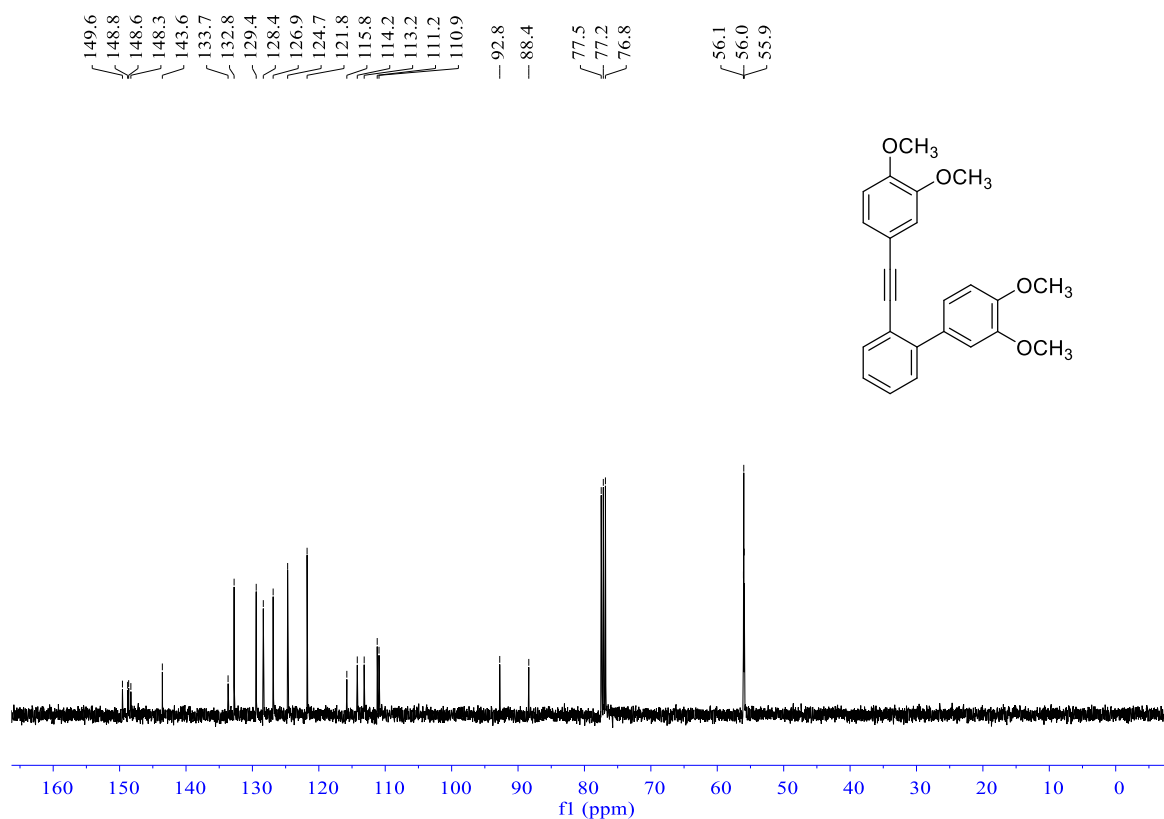

**Figure S18**  $^{13}\text{C}$  NMR spectrum of **7** (100 MHz,  $\text{CDCl}_3$ )

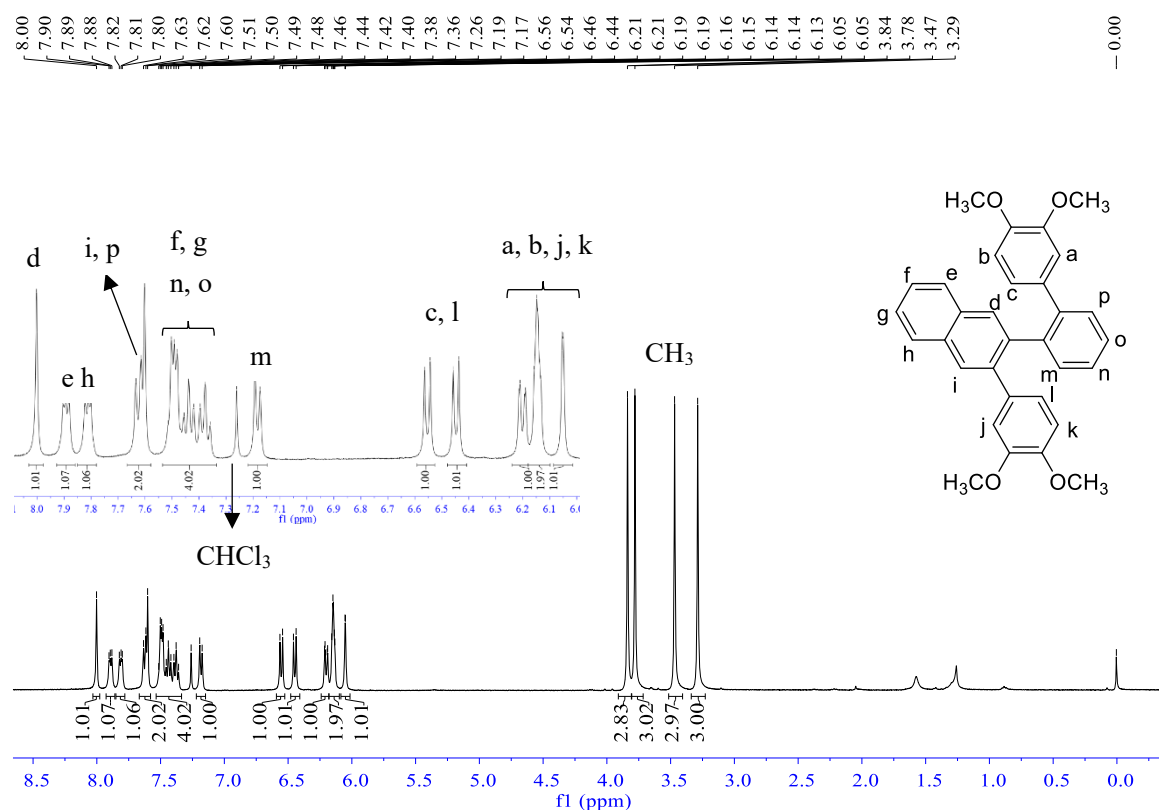

**Figure S19**  $^1\text{H}$  NMR spectrum of **1m** (400 MHz,  $\text{CDCl}_3$ )

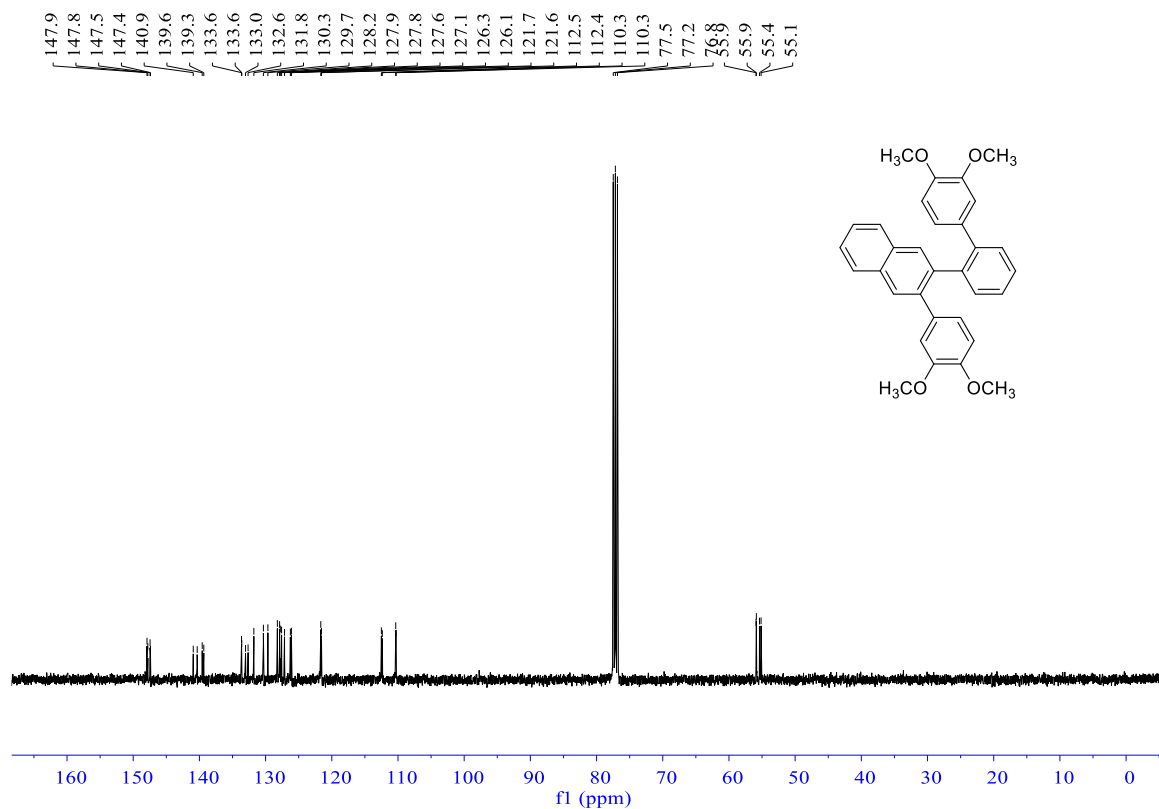

**Figure S20**  $^{13}\text{C}$  NMR spectrum of **1m** (100 MHz,  $\text{CDCl}_3$ )

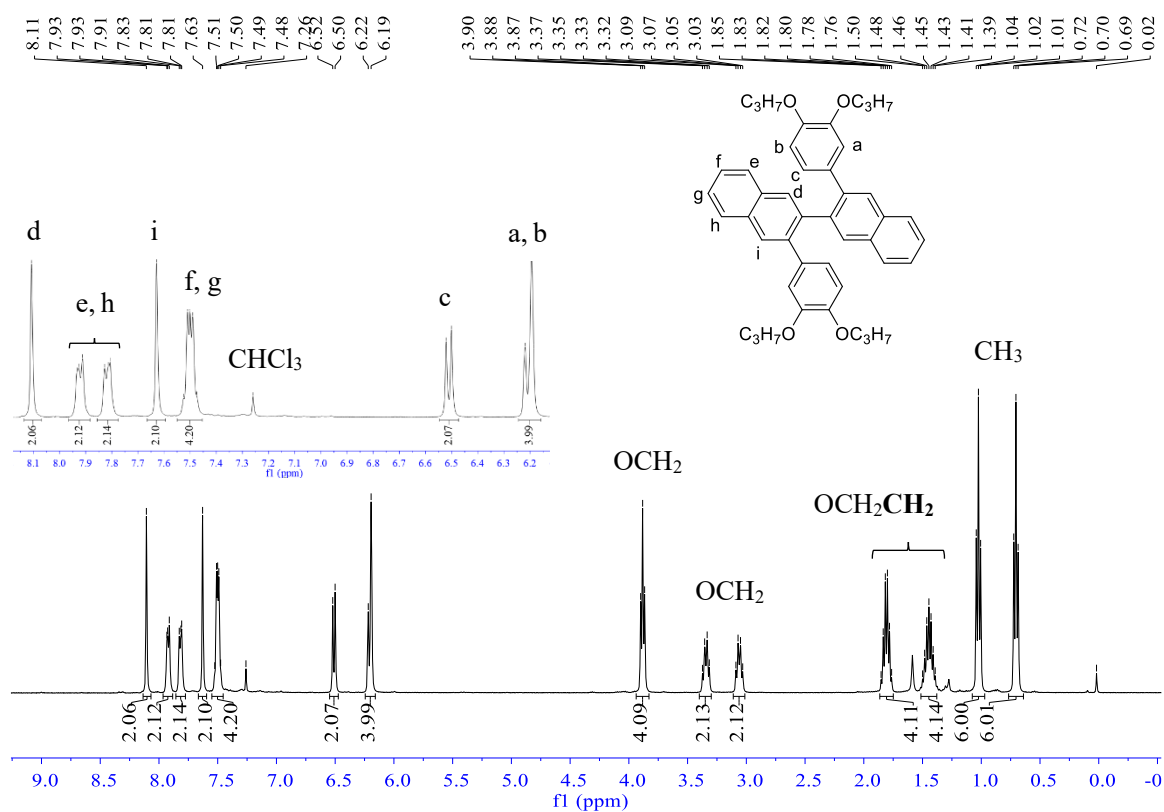

**Figure S21** <sup>1</sup>H NMR spectrum of **1n** (400 MHz, CDCl<sub>3</sub>)

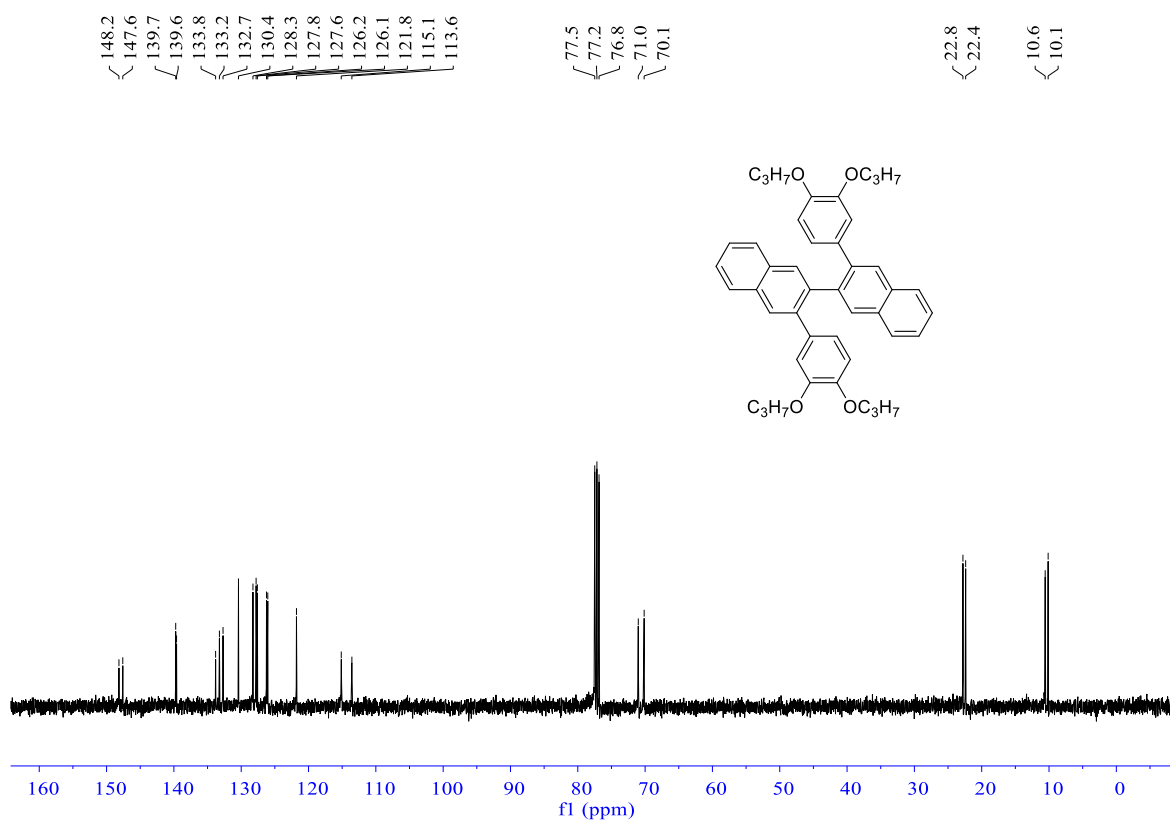

**Figure S22** <sup>13</sup>C NMR spectrum of **1n** (100 MHz, CDCl<sub>3</sub>)

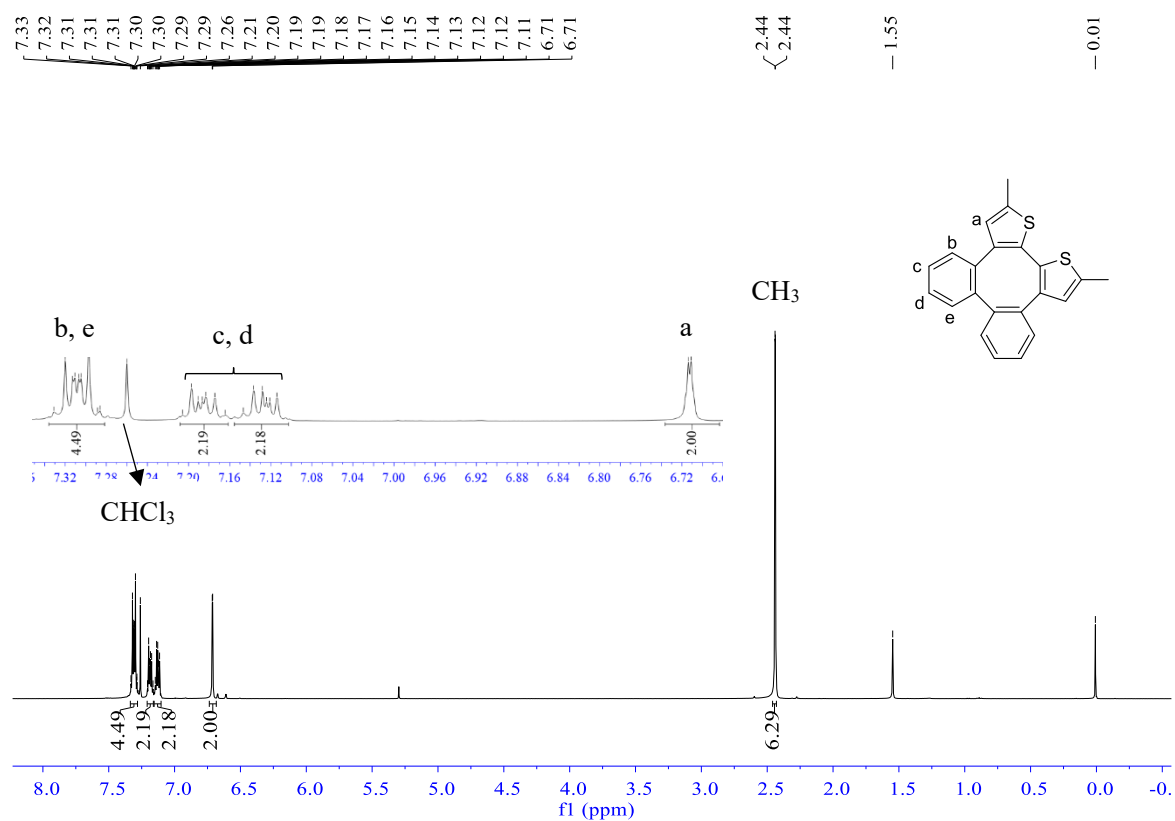

**Figure S23** <sup>1</sup>H NMR spectrum of **2c** (400 MHz, CDCl<sub>3</sub>)

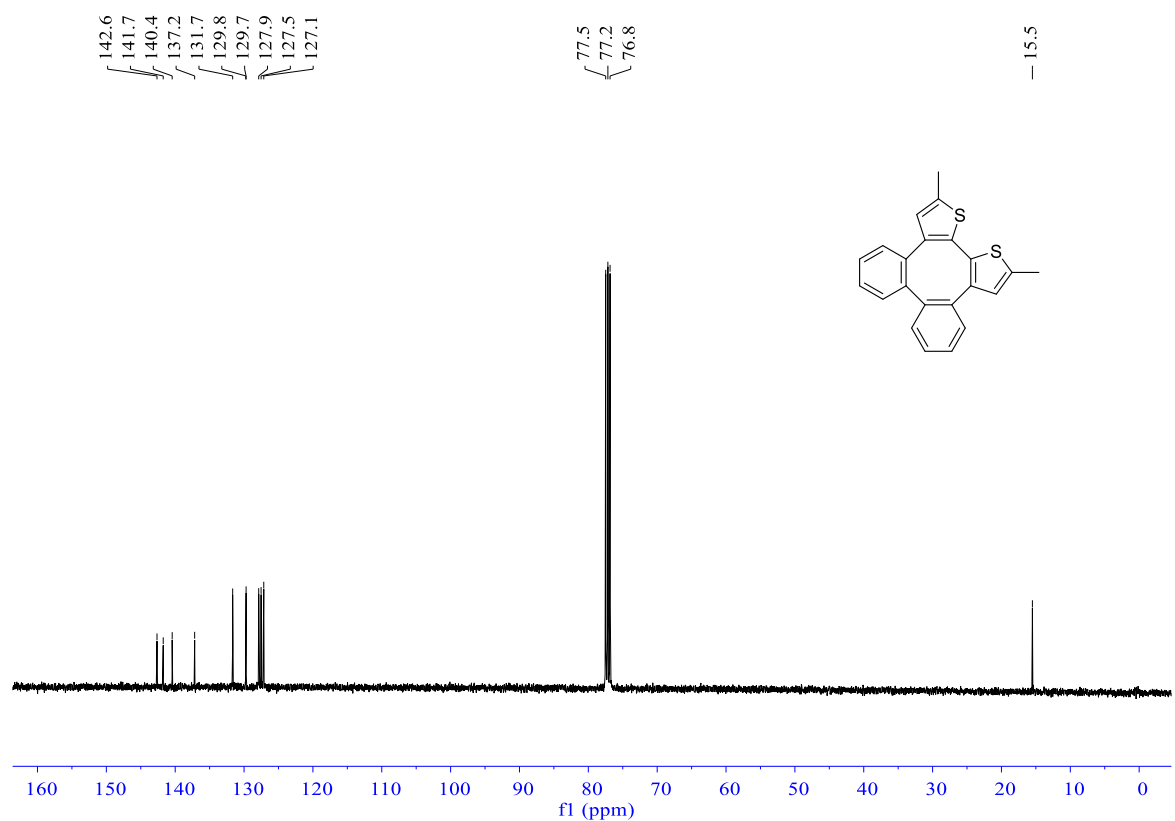

**Figure S24** <sup>13</sup>C NMR spectrum of **2c** (100 MHz, CDCl<sub>3</sub>)

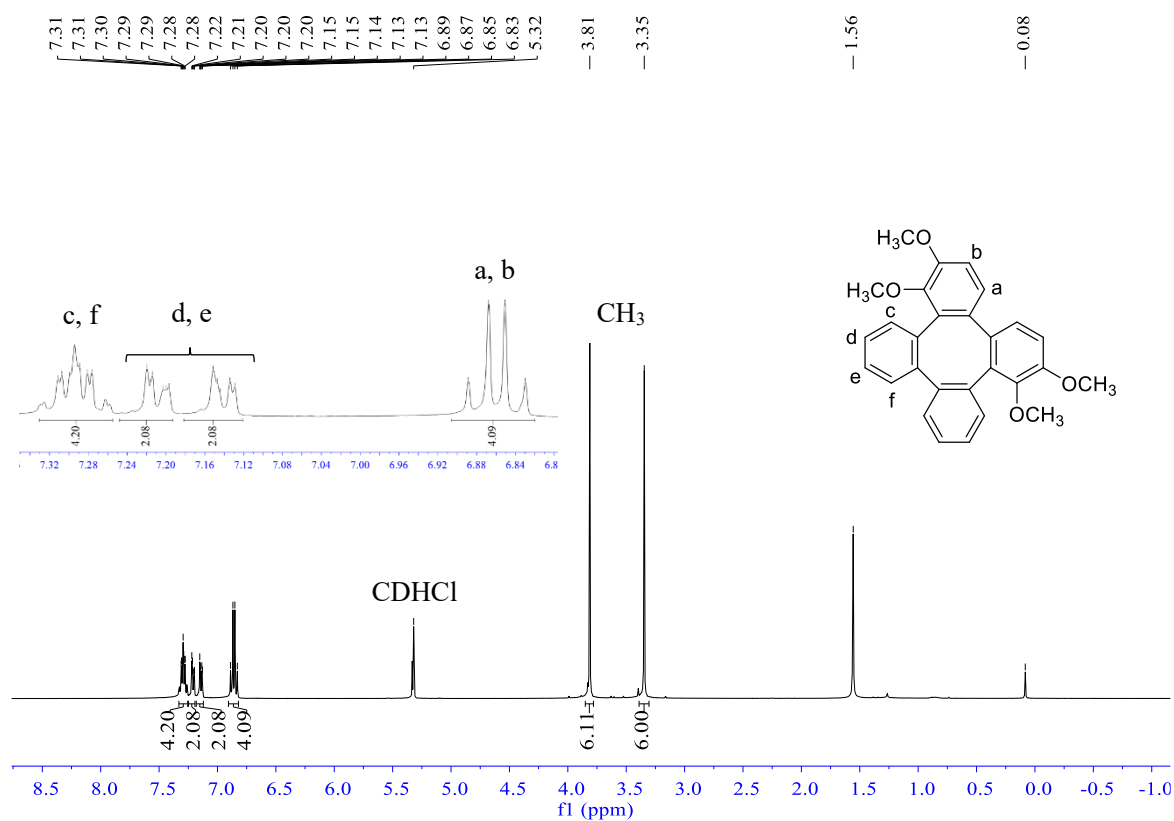

**Figure S25** <sup>1</sup>H NMR spectrum of **2e** (400 MHz, CD<sub>2</sub>Cl<sub>2</sub>)

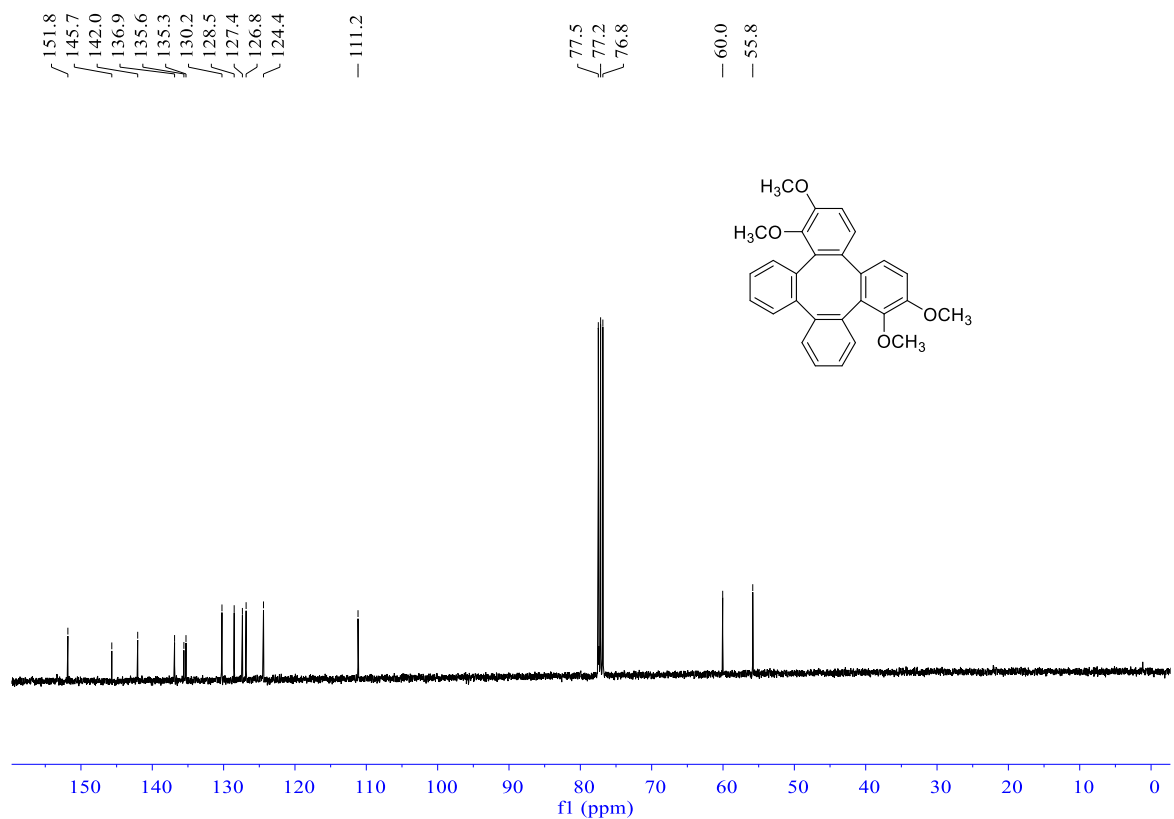

**Figure S26** <sup>13</sup>C NMR spectrum of **2e** (100 MHz, CDCl<sub>3</sub>)

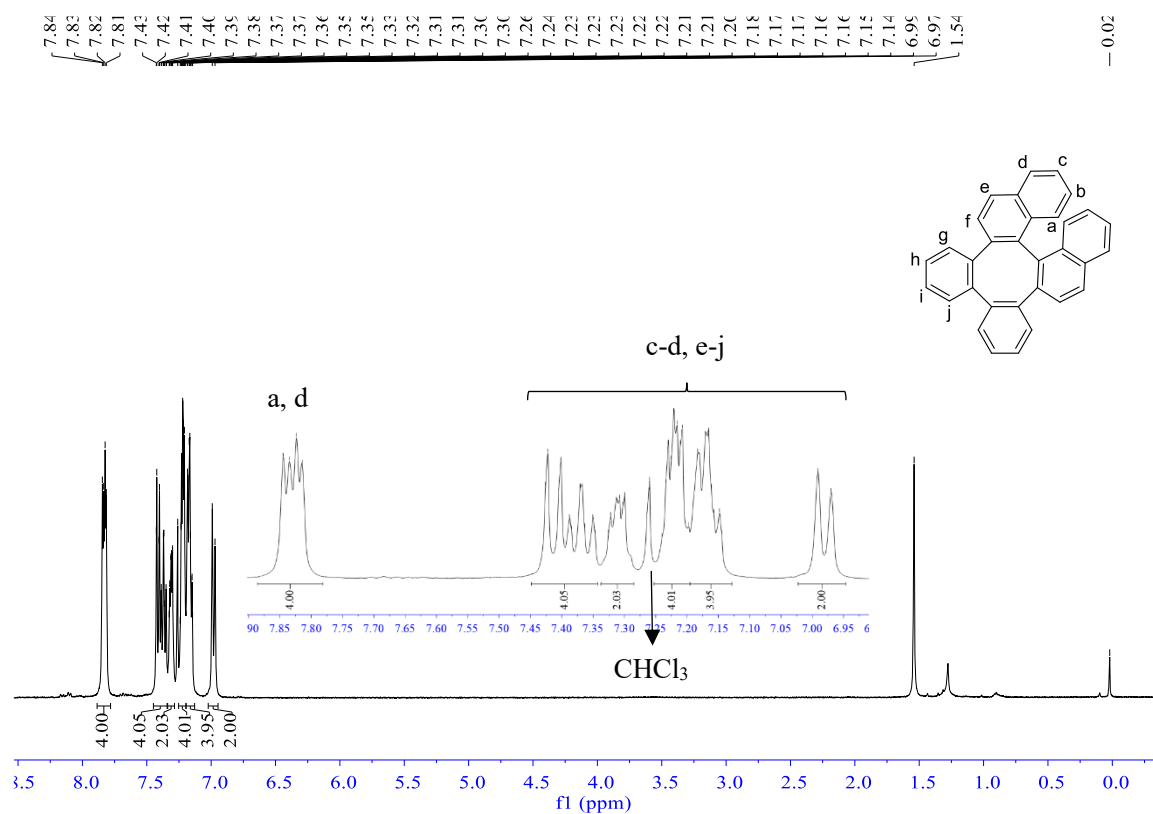

**Figure S27** <sup>1</sup>H NMR spectrum of **2g** (400 MHz, CDCl<sub>3</sub>)

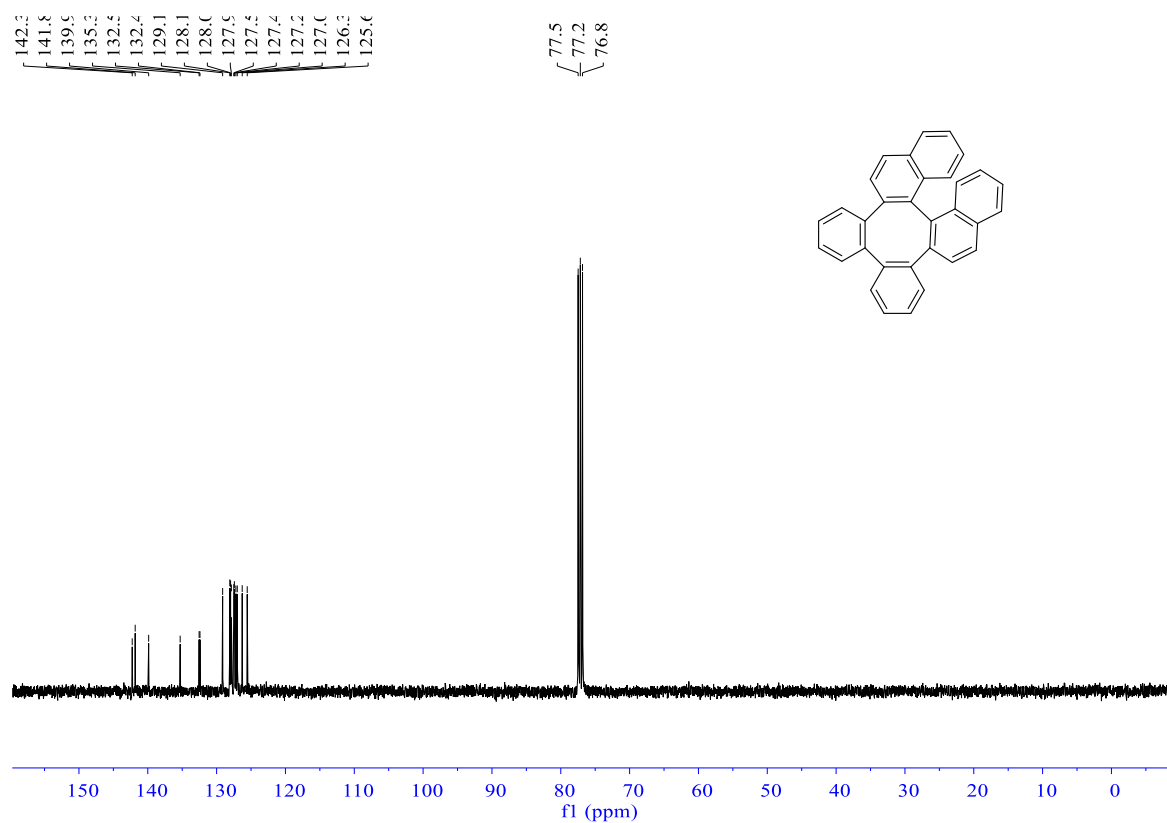

**Figure S28** <sup>13</sup>C NMR spectrum of **2g** (100 MHz, CDCl<sub>3</sub>)

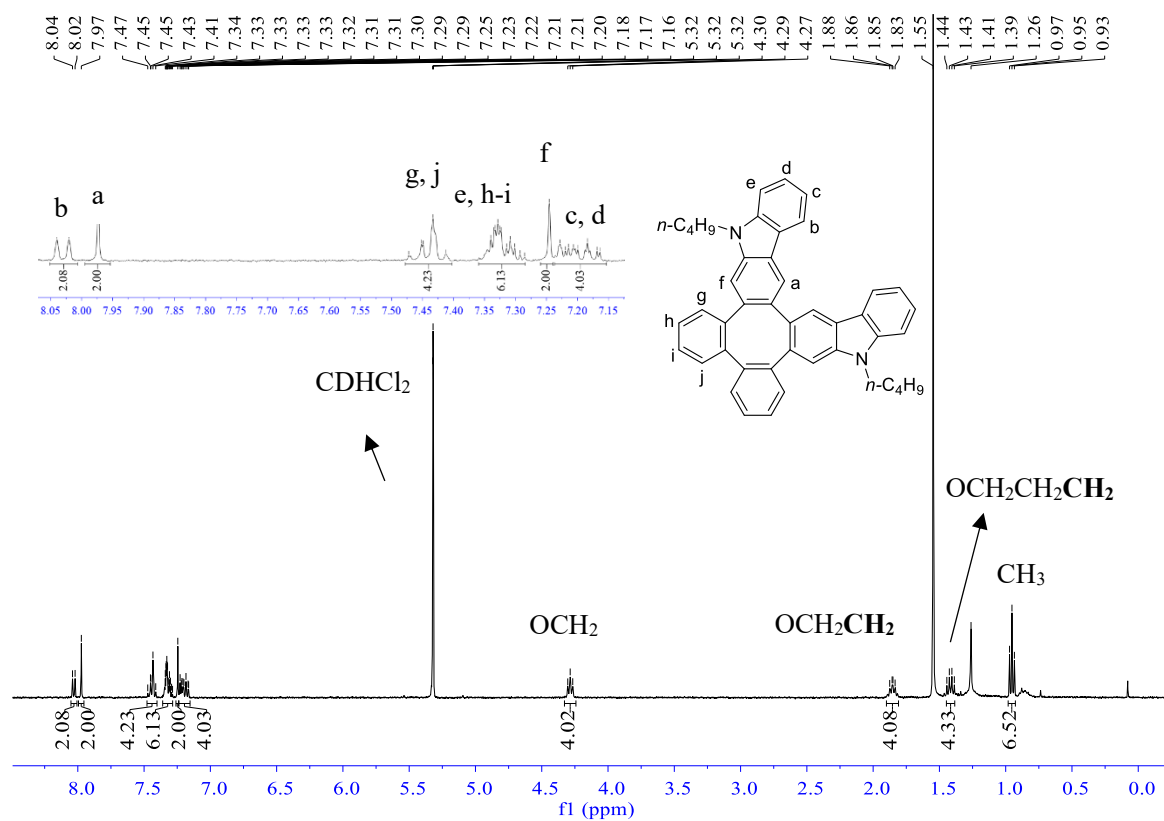

**Figure S29** <sup>1</sup>H NMR spectrum of **2h** (400 MHz, CD<sub>2</sub>Cl<sub>2</sub>)

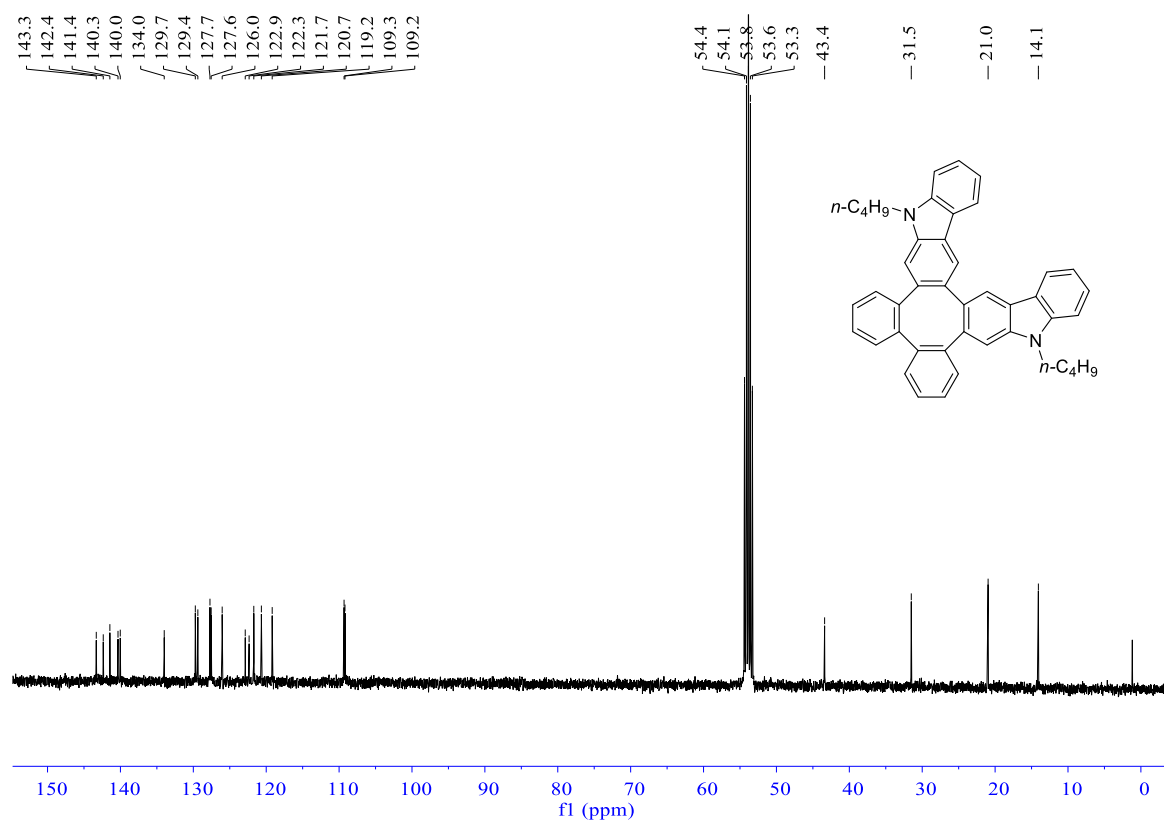

**Figure S30** <sup>13</sup>C NMR spectrum of **2h** (100 MHz, CD<sub>2</sub>Cl<sub>2</sub>)

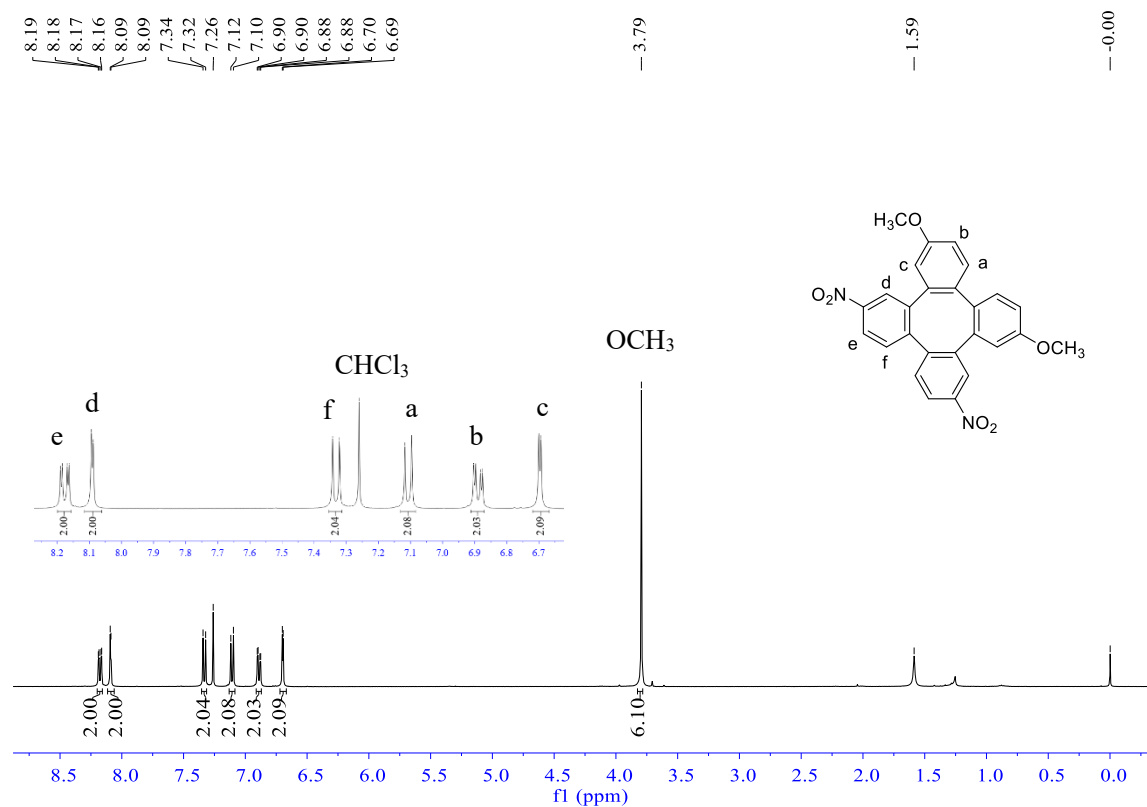

**Figure S31** <sup>1</sup>H NMR spectrum of **2j** (400 MHz, CDCl<sub>3</sub>)

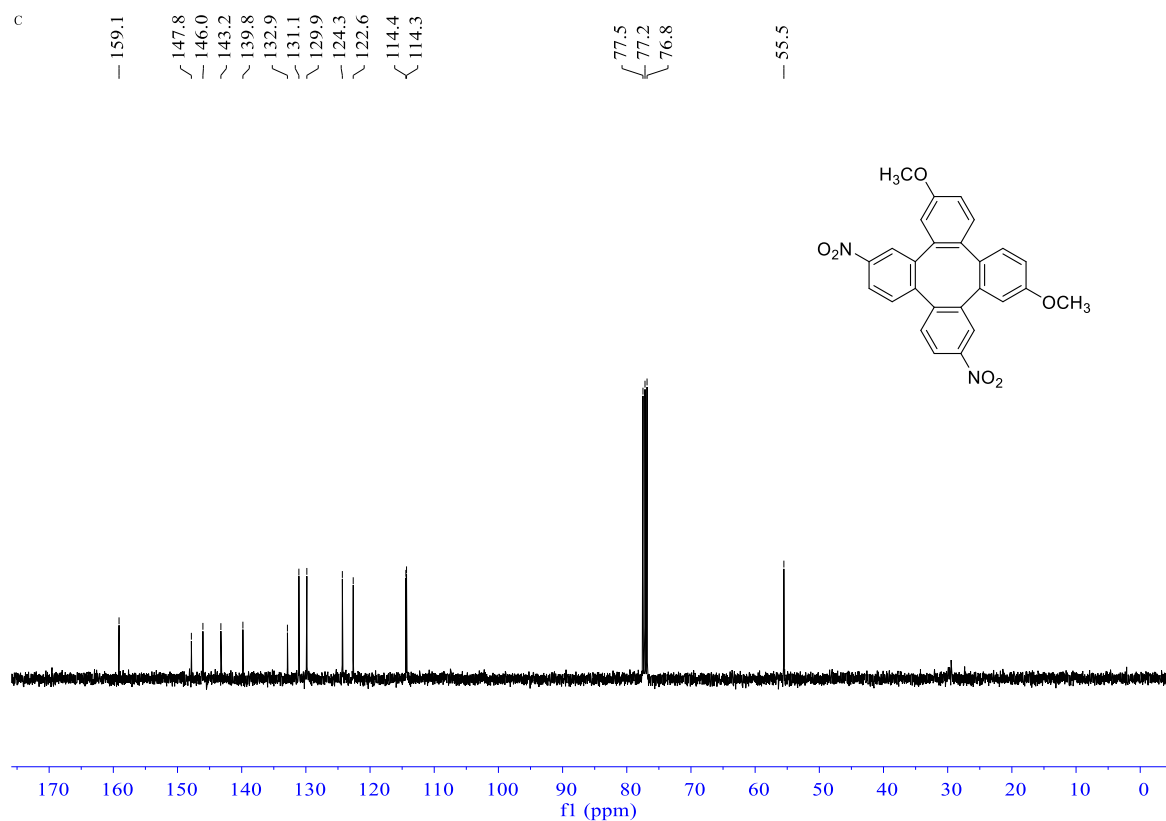

**Figure S32** <sup>13</sup>C NMR spectrum of **2j** (100 MHz, CDCl<sub>3</sub>)

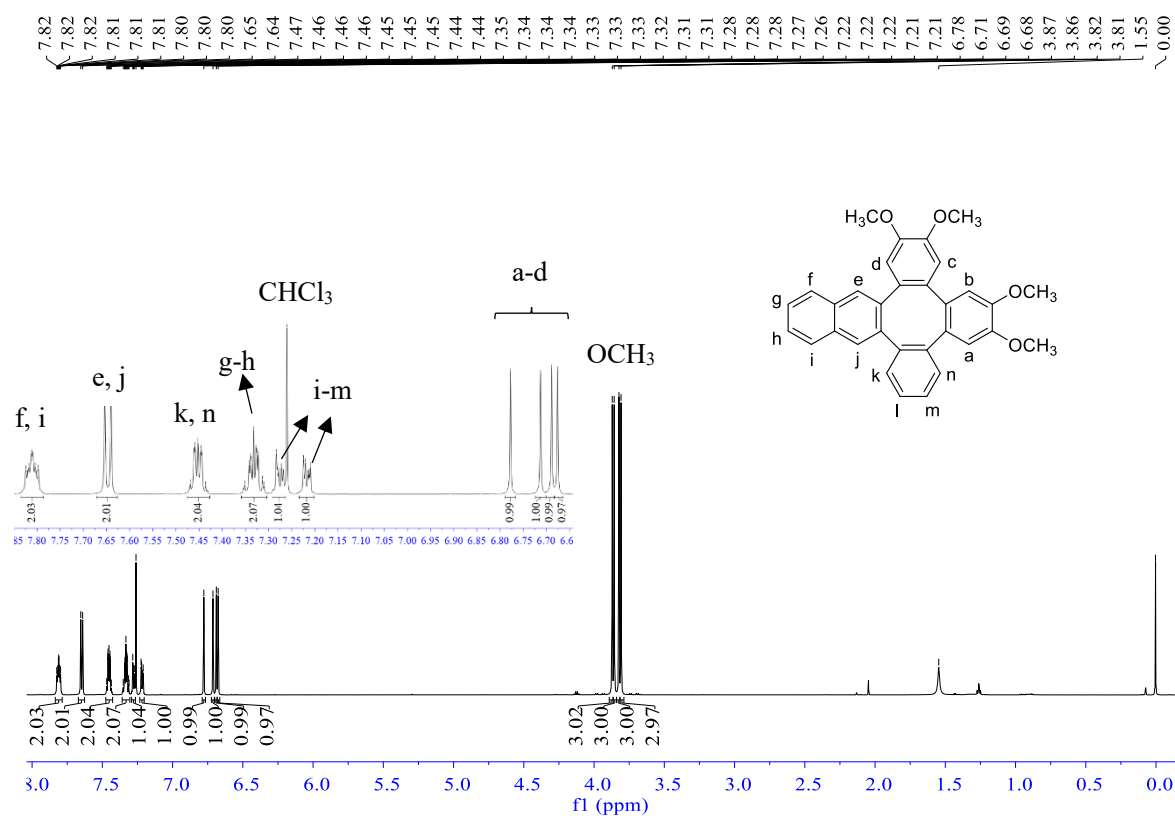

**Figure S33** <sup>1</sup>H NMR spectrum of **2m** (600 MHz, CDCl<sub>3</sub>)

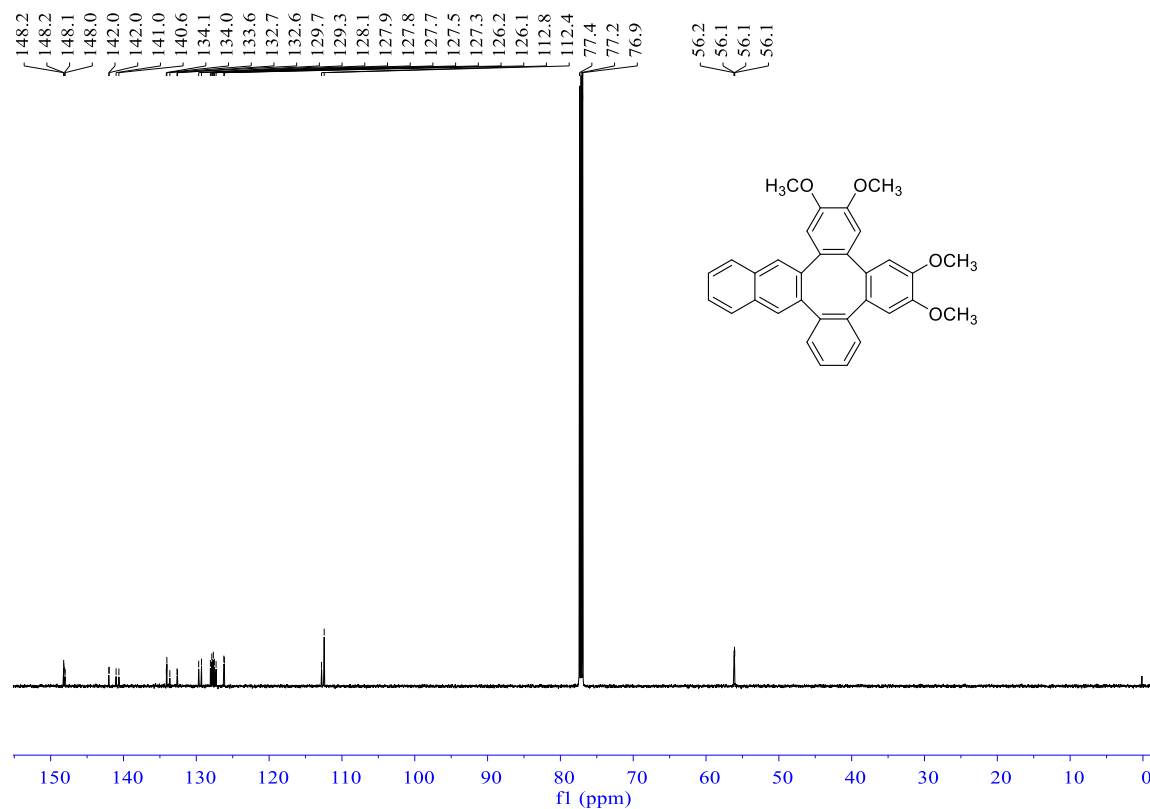

**Figure S34** <sup>13</sup>C NMR spectrum of **2m** (150 MHz, CDCl<sub>3</sub>)

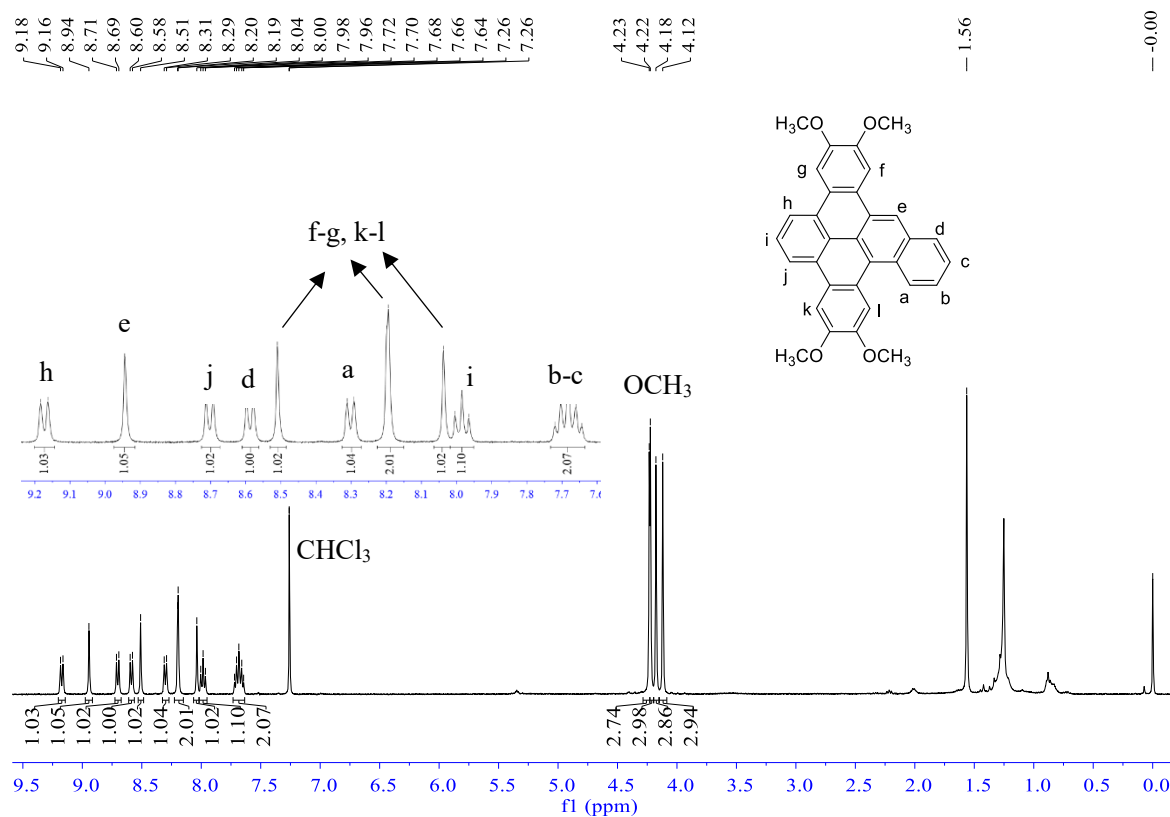

**Figure S35** <sup>1</sup>H NMR spectrum of **3m** (400 MHz, CDCl<sub>3</sub>)

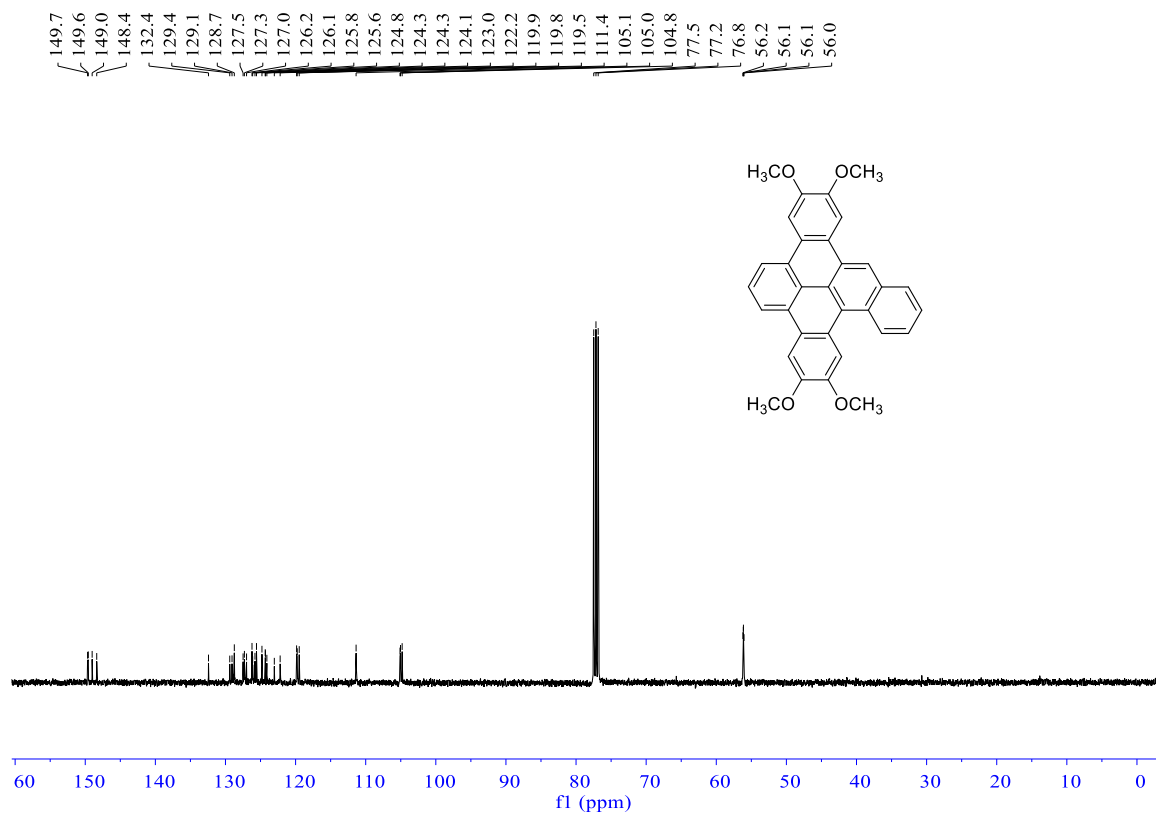

**Figure S36** <sup>13</sup>C NMR spectrum of **3m** (100 MHz, CDCl<sub>3</sub>)

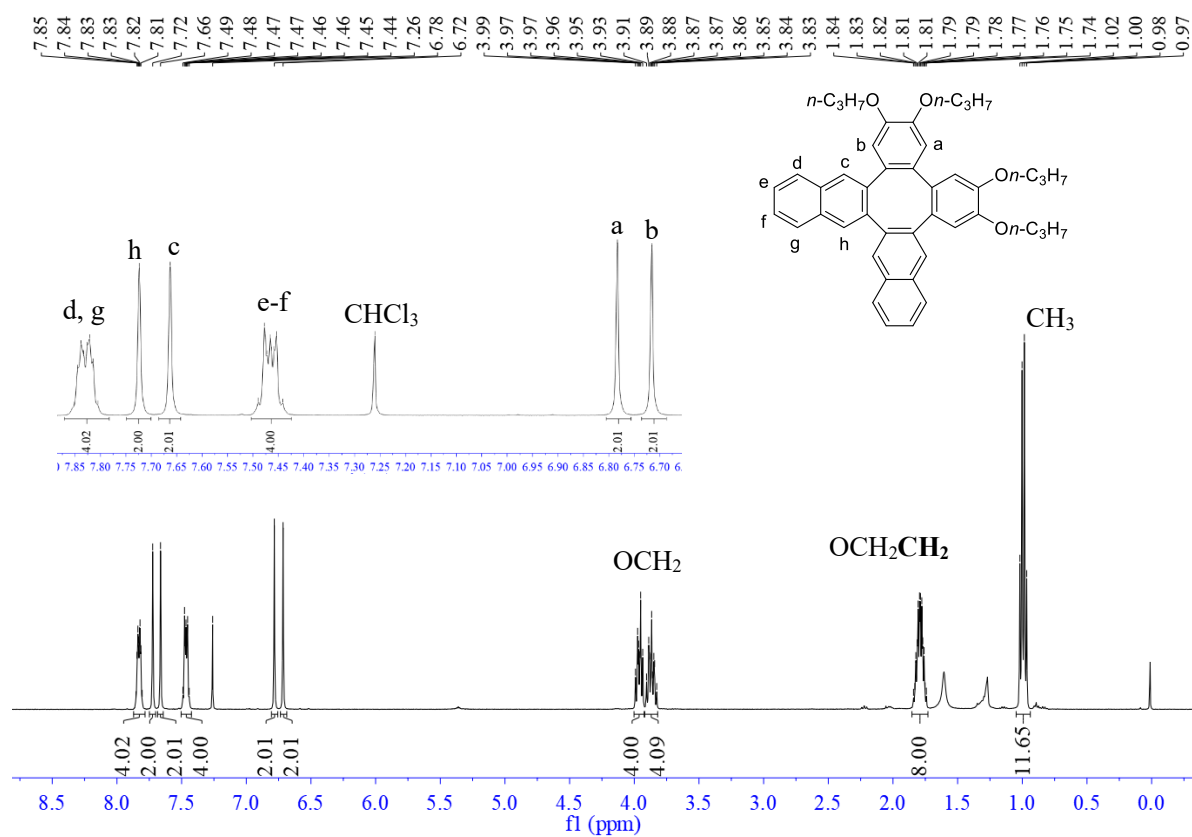

**Figure S37**  $^1\text{H}$  NMR spectrum of **2n** (400 MHz,  $\text{CDCl}_3$ )

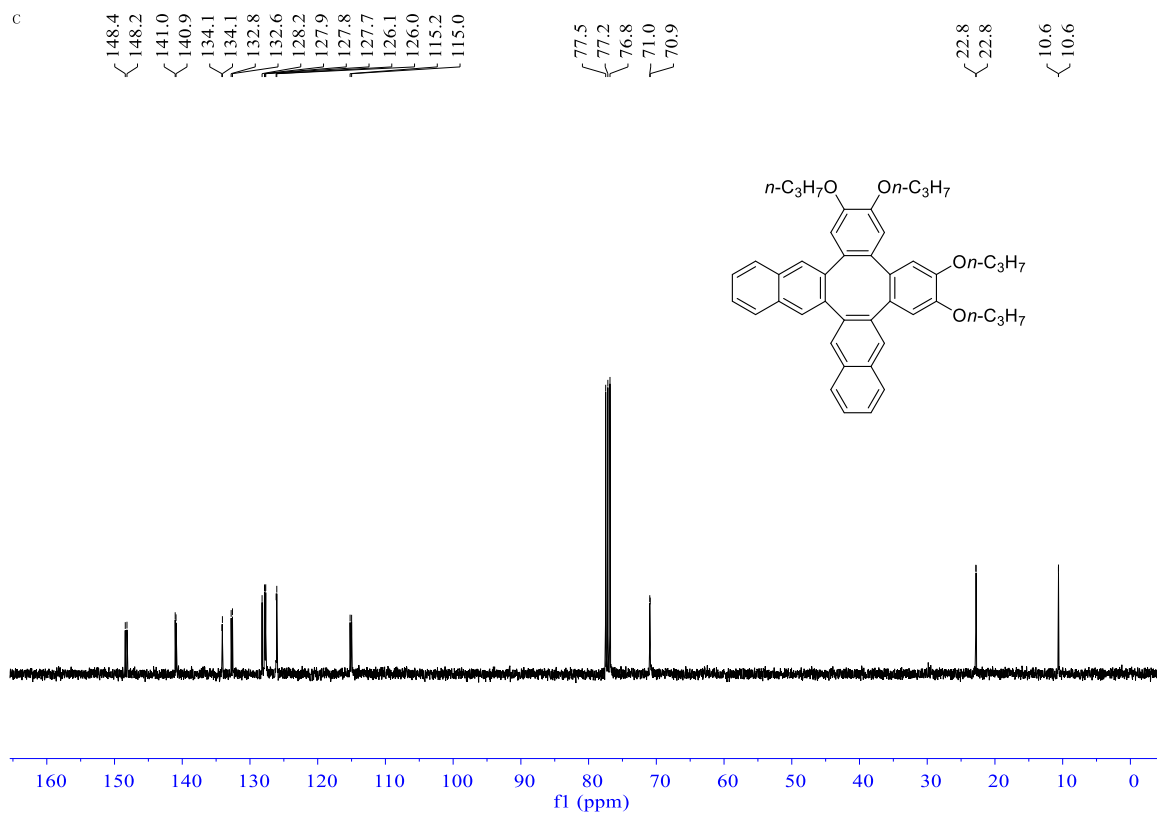

**Figure S38**  $^{13}\text{C}$  NMR spectrum of **2n** (100 MHz,  $\text{CDCl}_3$ )

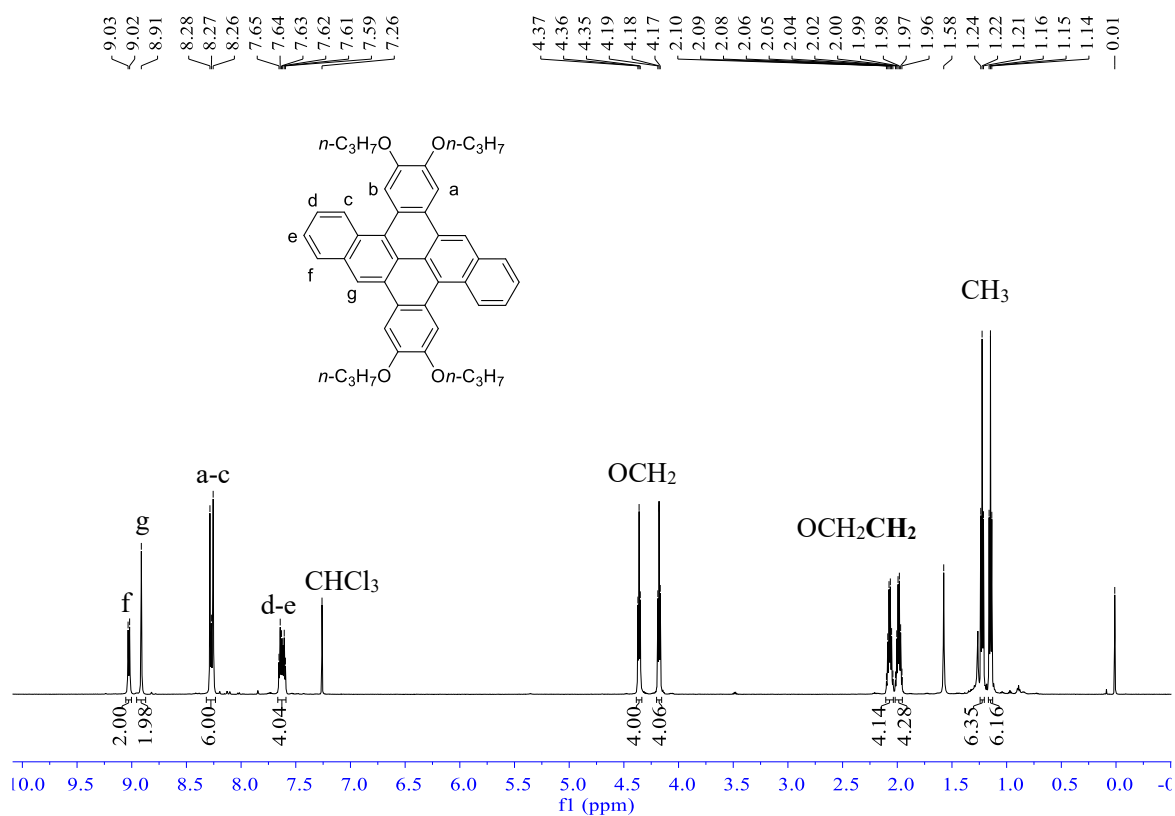

**Figure S39**  $^1\text{H}$  NMR spectrum of **3n** (600 MHz,  $\text{CDCl}_3$ )

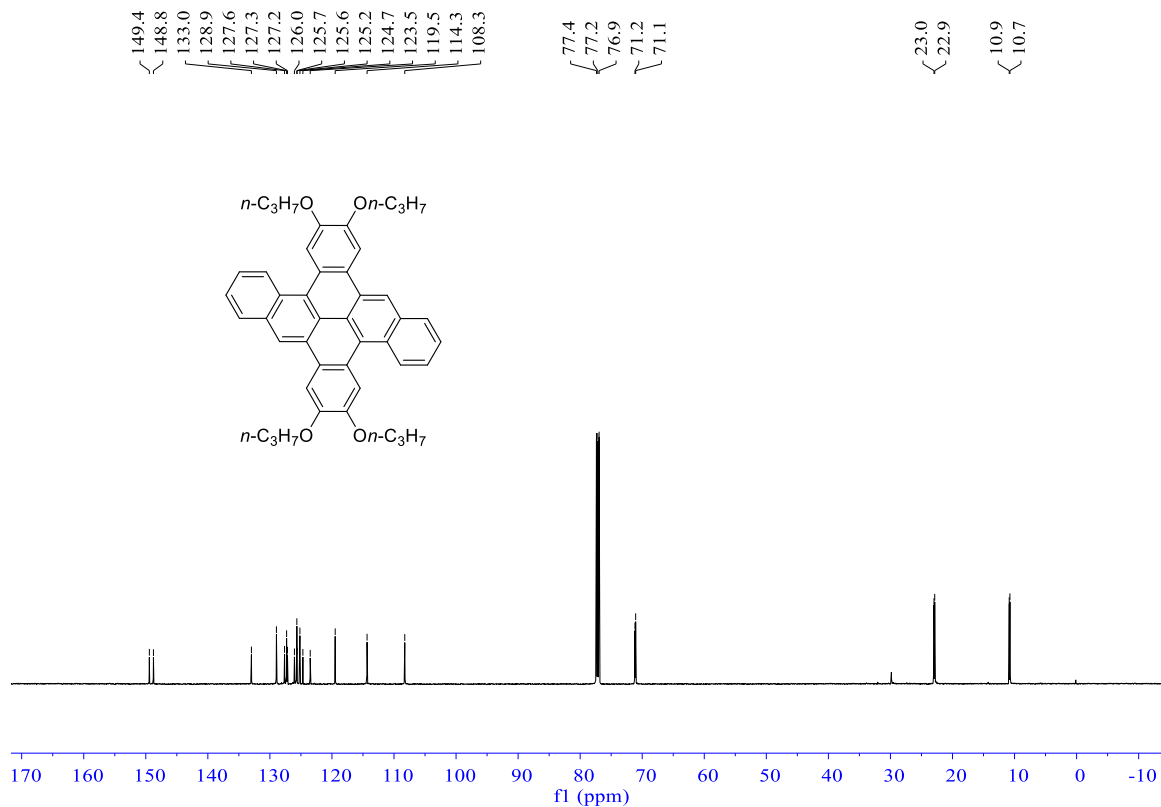

**Figure S40**  $^{13}\text{C}$  NMR spectrum of **3n** (150 MHz,  $\text{CDCl}_3$ )

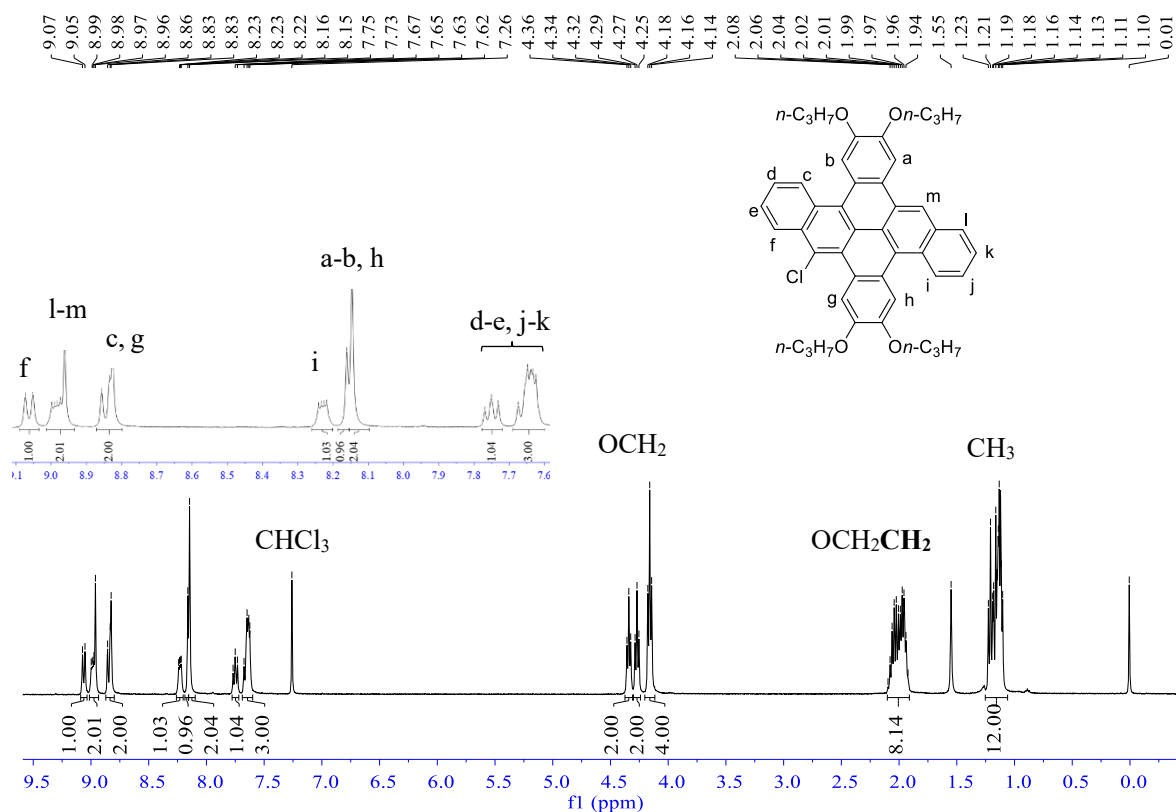

**Figure S41** <sup>1</sup>H NMR spectrum of **3n-Cl** (400 MHz, CDCl<sub>3</sub>)

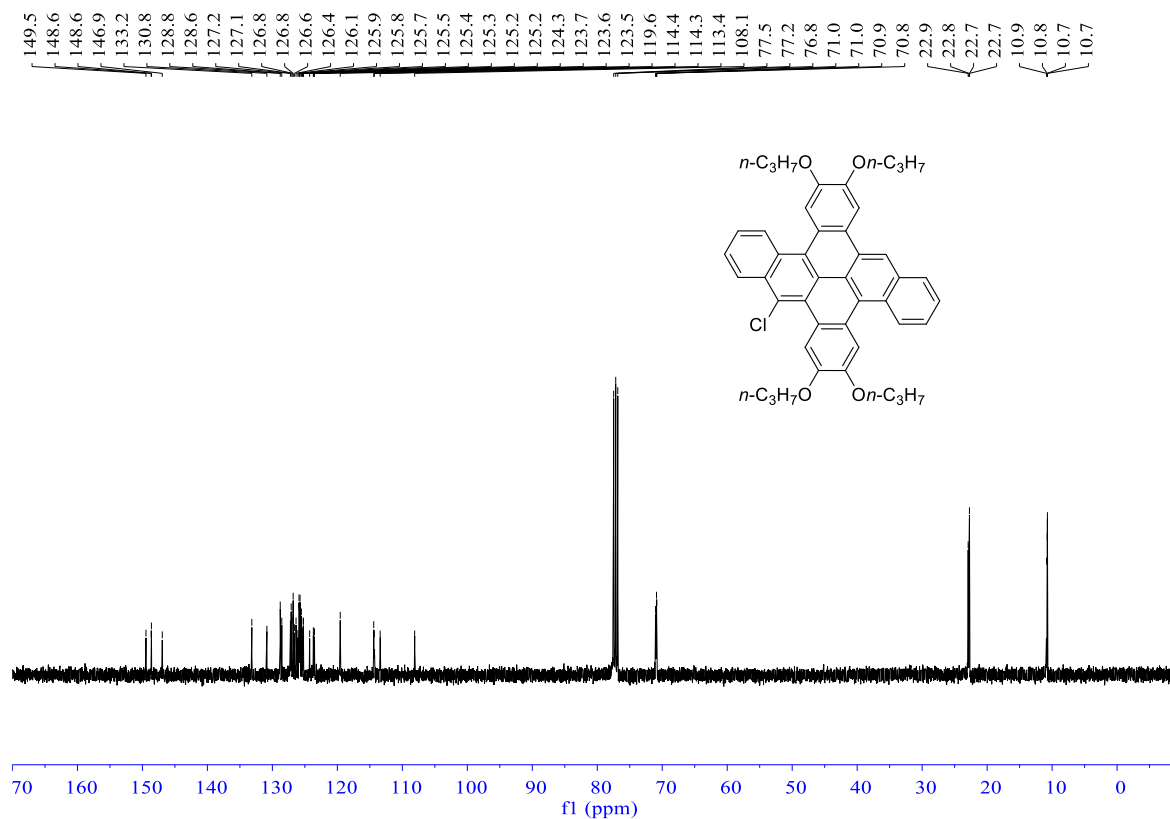

**Figure S42** <sup>13</sup>C NMR spectrum of **3n-Cl** (100 MHz, CDCl<sub>3</sub>)

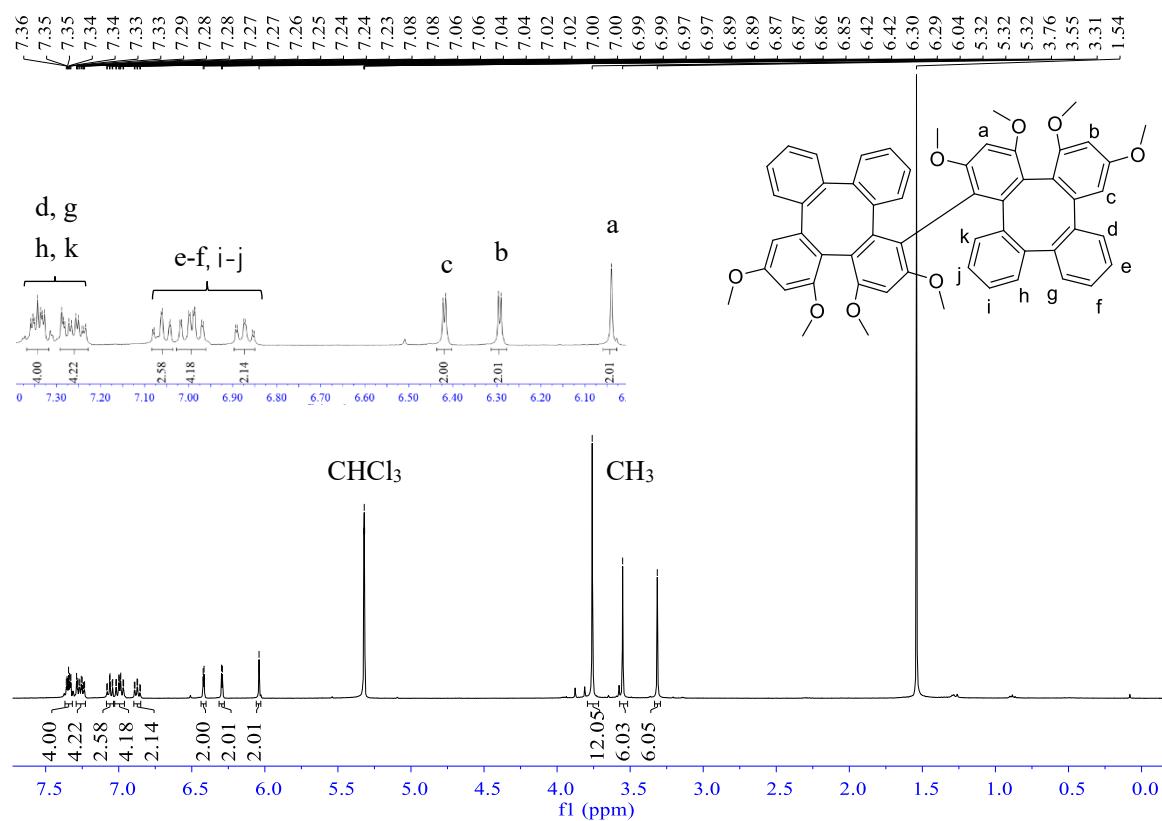

**Figure S43** <sup>1</sup>H NMR spectrum of **5** (400 MHz, CD<sub>2</sub>Cl<sub>2</sub>)

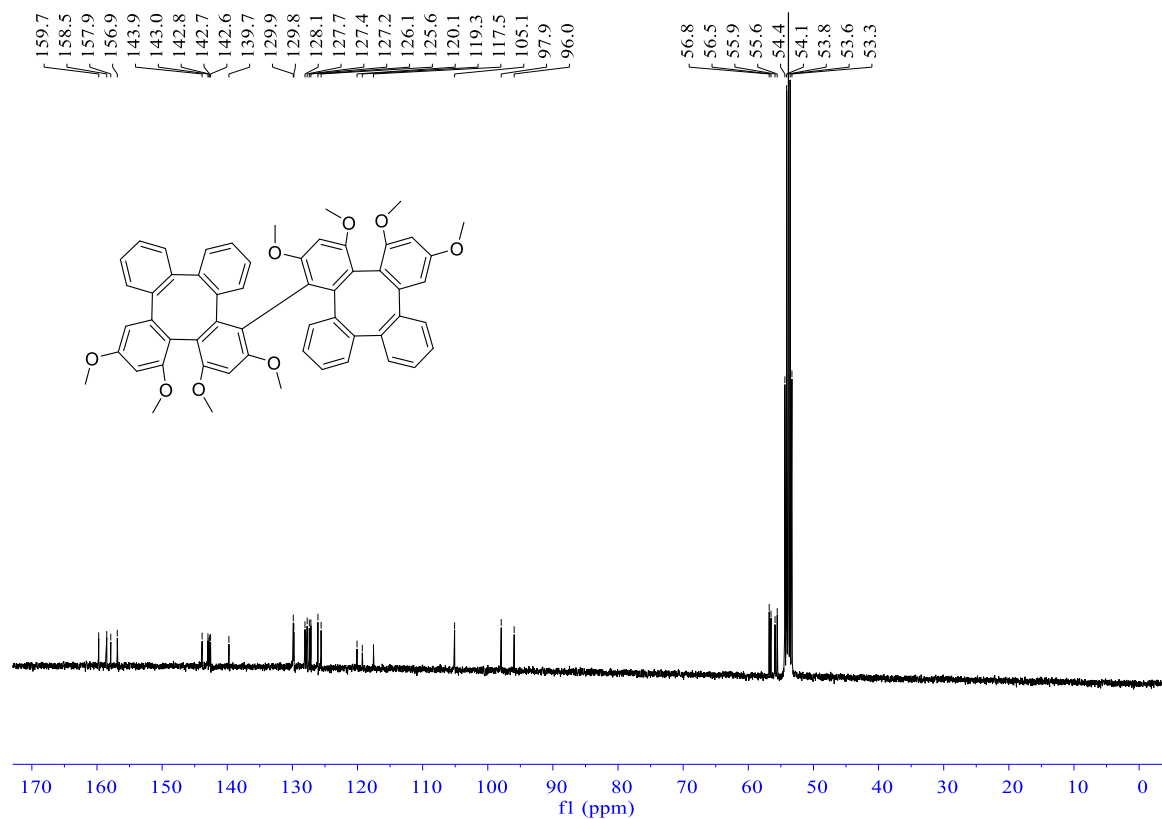

**Figure S44** <sup>13</sup>C NMR spectrum of **5** (100 MHz, CD<sub>2</sub>Cl<sub>2</sub>)

### 3. Mass spectra

#### Accurate Mass Measurement

|                                        |                                                |
|----------------------------------------|------------------------------------------------|
| Molecular formula :                    | C <sub>22</sub> H <sub>16</sub> S <sub>2</sub> |
| Experimental Mass [M+H] <sup>+</sup> : | 345.07654                                      |
| Theoretical Mass [M+H] <sup>+</sup> :  | 345.07662                                      |
| Error (ppm) :                          | -0.2                                           |

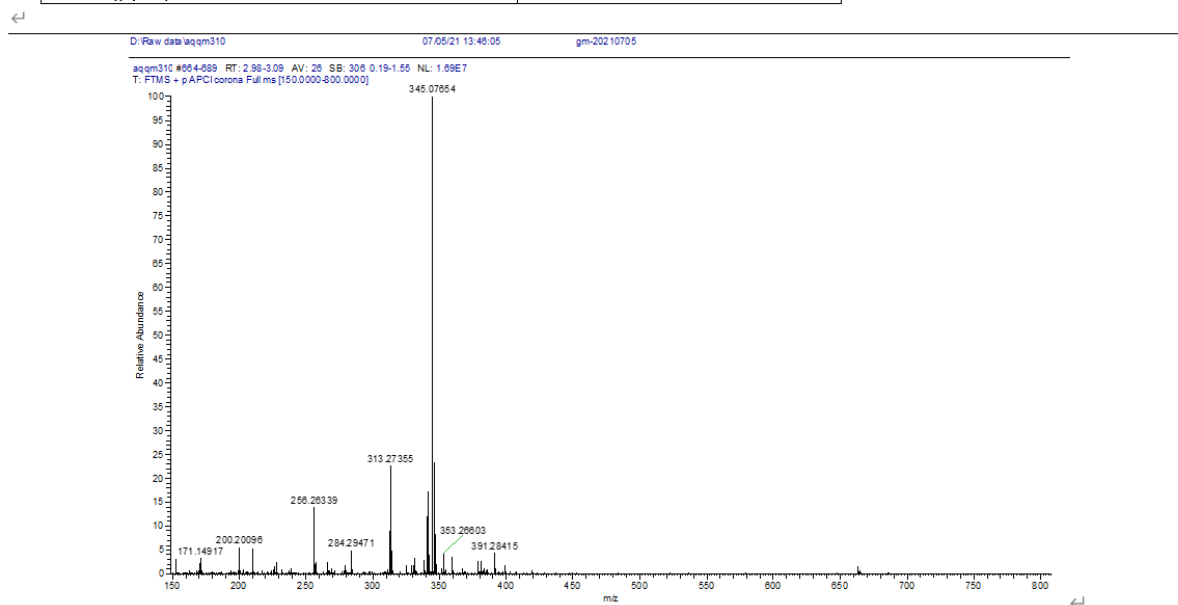

Figure S45 Mass spectrum (APCI) of 2c

#### Accurate Mass Measurement

|                                        |                                                |
|----------------------------------------|------------------------------------------------|
| Molecular formula :                    | C <sub>28</sub> H <sub>24</sub> O <sub>4</sub> |
| Experimental Mass [M+H] <sup>+</sup> : | 425.17433                                      |
| Theoretical Mass [M+H] <sup>+</sup> :  | 425.17474                                      |
| Error (ppm) :                          | -1.0                                           |

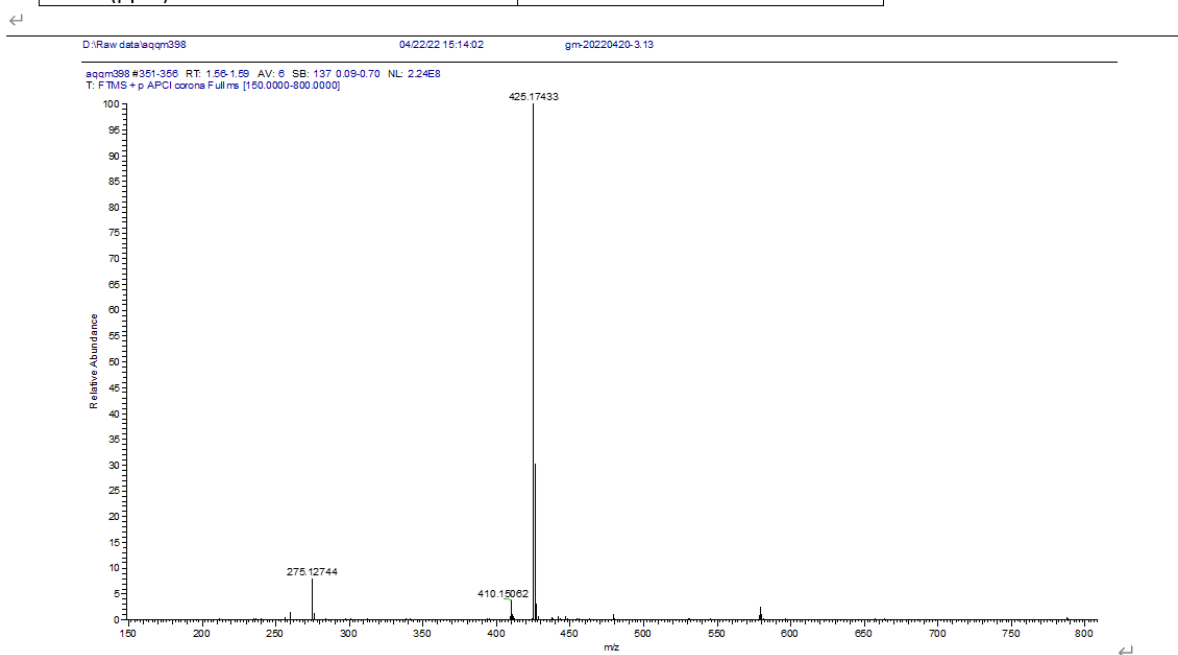

Figure S46 Mass spectrum (APCI) of 2e

20232872 #21 RT: 0.3629 AV: 1 NL: 4.15E4  
T: FTMS + p NSI Full ms [50.00-800.00]

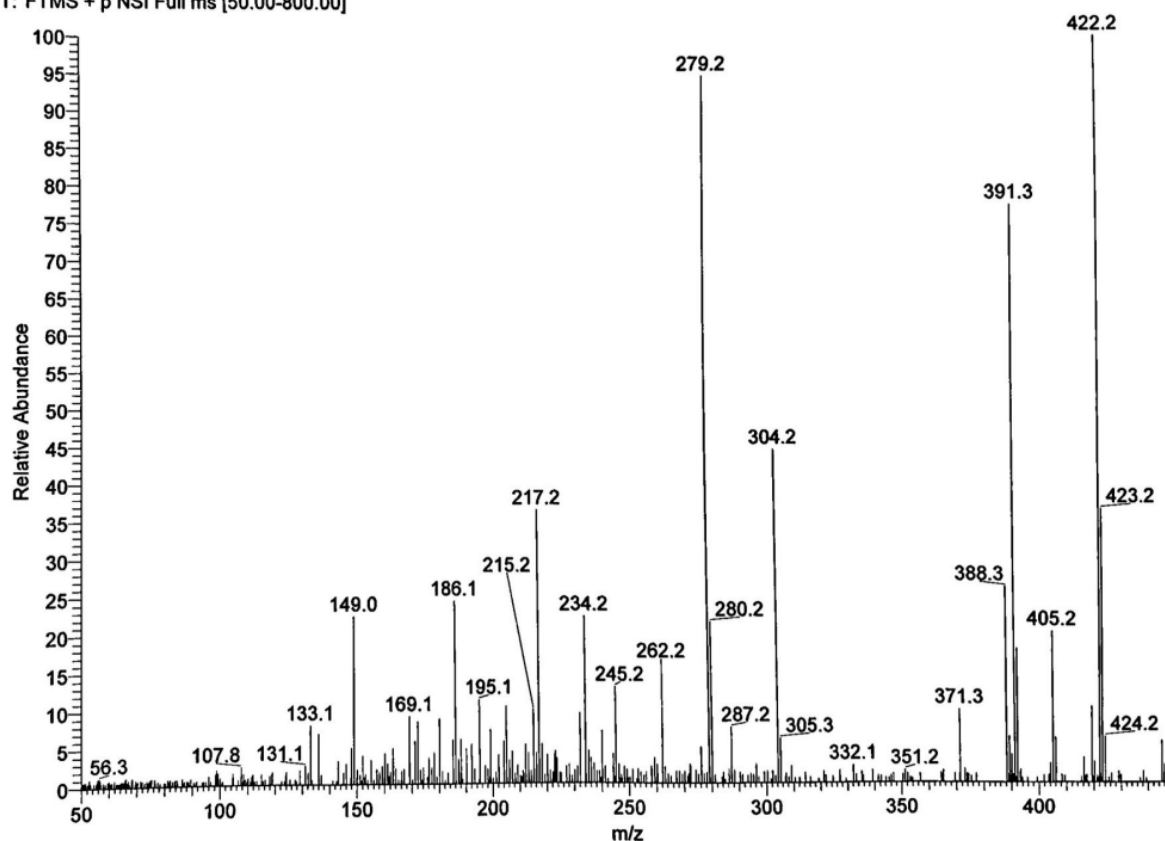

Figure S47 Mass spectrum (DART) of 2g

**Accurate Mass Measurement**

|                                               |                                   |                 |
|-----------------------------------------------|-----------------------------------|-----------------|
| Molecular formula : $\triangleleft$           | $C_{44}H_{38}N_2$ $\triangleleft$ | $\triangleleft$ |
| Experimental Mass $[M+H]^+$ : $\triangleleft$ | 595.31032 $\triangleleft$         | $\triangleleft$ |
| Theoretical Mass $[M+H]^+$ : $\triangleleft$  | 595.31078 $\triangleleft$         | $\triangleleft$ |
| Error (ppm) : $\triangleleft$                 | -0.8 $\triangleleft$              | $\triangleleft$ |

$\triangleleft$

D:\Raw\data\eqgm394

04/22/22 14:27:14

gm20220420-3.9

eqgm394 #357-431 RT: 1.59-1.92 AV: 75 SB: 222 0.05-1.05 NL: 4.56E7  
T: FTMS + p APCI corona Full ms [150.0000-800.0000]

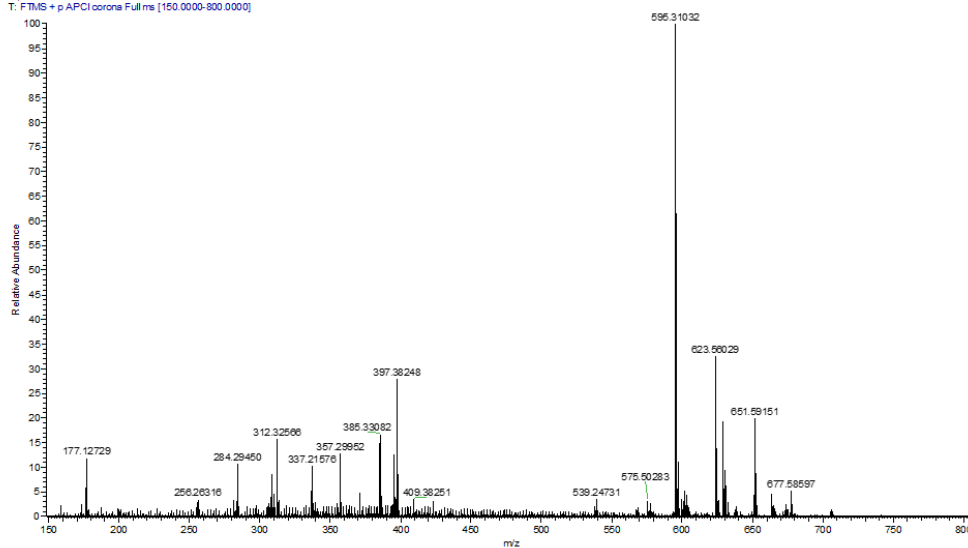

Figure S48 Mass spectrum (APCI) of 2h

D20222796 #53 RT: 1.0580 AV: 1 NL: 1.89E5  
T: FTMS - p NSI Full ms [50.00-800.00]

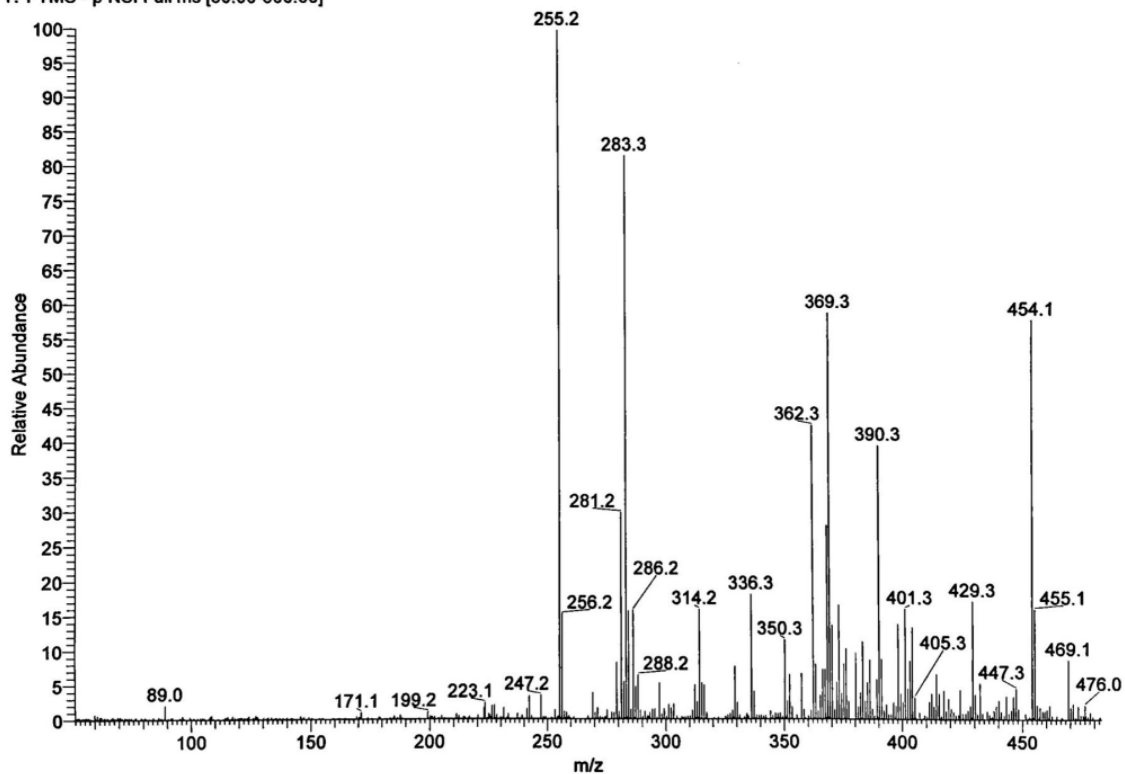

Figure S49 Mass spectrum (DART) of 2j

D20220715 #39 RT: 0.8422 AV: 1 NL: 3.29E4  
T: FTMS + p NSI Full ms [50.00-800.00]

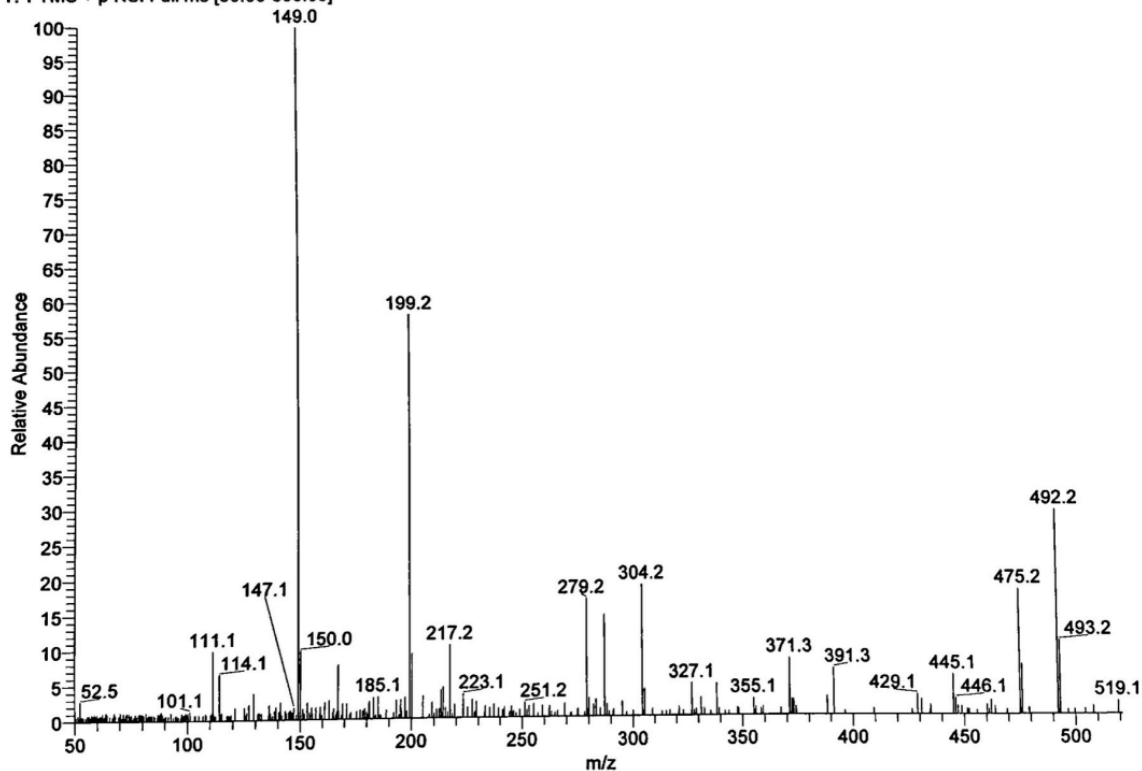

Figure S50 Mass spectrum (DART) of 2m

D20220646 #20 RT: 0.3732 AV: 1 NL: 2.77E5  
T: FTMS + p NSI Full ms [50.00-800.00]

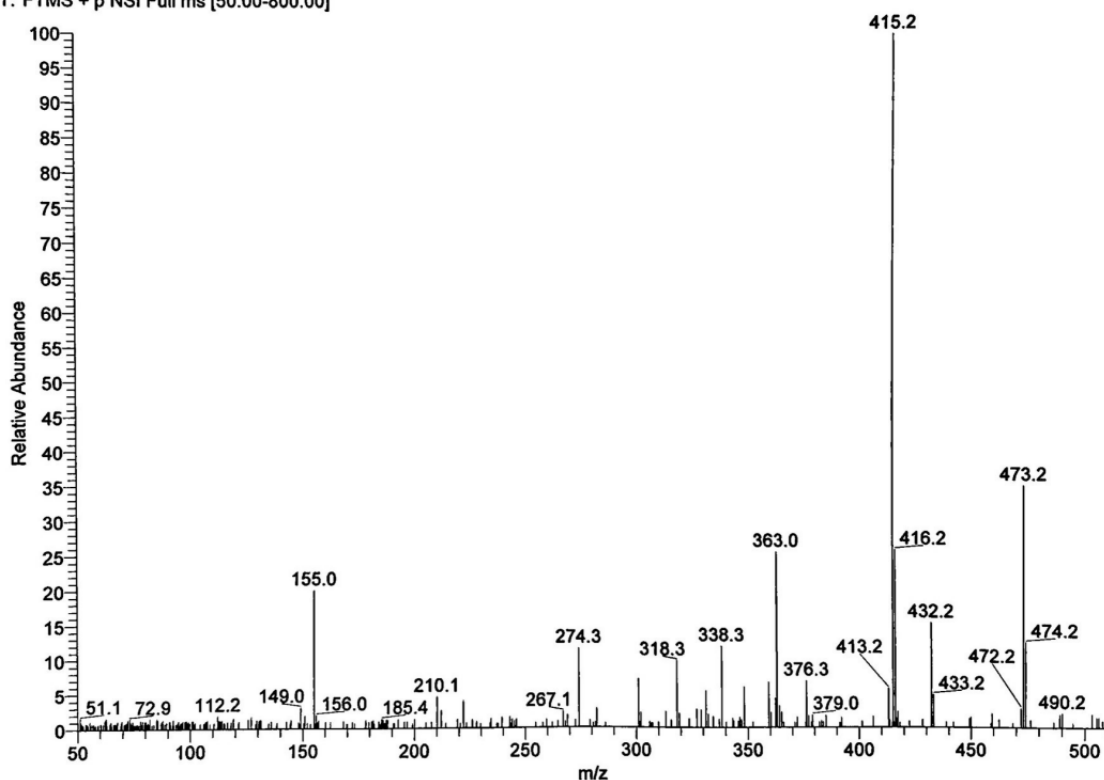

Figure S51 Mass spectrum (DART) of 3m

D20222052 #41 RT: 0.6706 AV: 1 NL: 8.90E6  
T: FTMS + p NSI Full ms [50.00-1000.00]

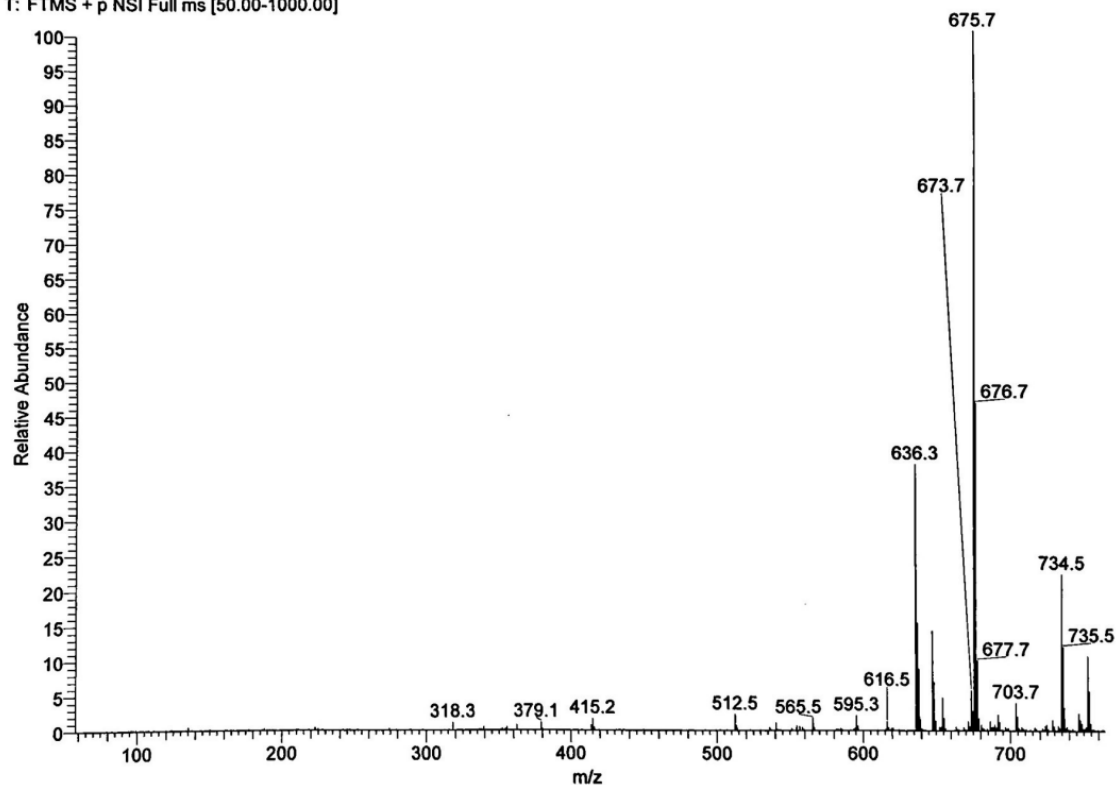

Figure S52 Mass spectrum (DART) of 2n

yxh-5015 #10-59 RT: 0.15-0.85 AV: 50 MS: 2.7152  
T: FTMS + p NSI Full ms [300.0000-1500.0]

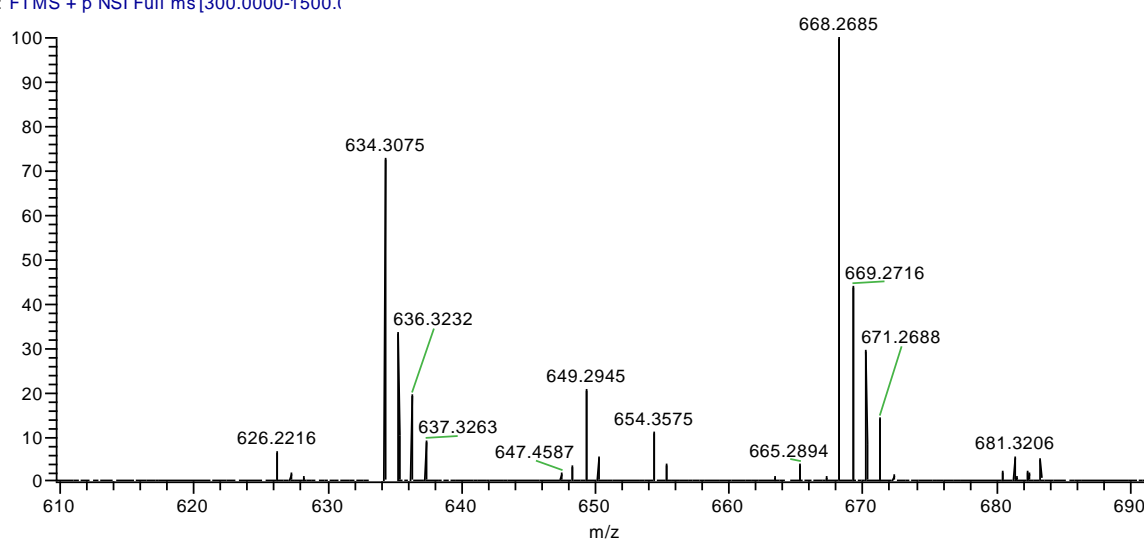

Theoretical mass of  $C_{44}H_{42}O_4$  is 634.3078, and theoretical mass of  $C_{44}H_{41}O_4Cl$  is 668.2688.

**Figure S53** Mass spectra (MALDI) of **3n** and **3n-Cl**.

#### Accurate Mass Measurement

|                               |                   |
|-------------------------------|-------------------|
| Molecular formula :           | $C_{56}H_{46}O_8$ |
| Experimental Mass $[M+H]^+$ : | 847.32618         |
| Theoretical Mass $[M+H]^+$ :  | 847.32654         |
| Error (ppm) :                 | -0.4              |

←

D:\Raw data\eqm434

08/01/22 14:28:14

gm8ring-dimer

eqm434 #664 RT: 2.93 AV: 1 SB: 254 0.05-1.25 NL: 8.17E8  
T: FTMS + p APCI corona Full ms [150.0000-1000.0000]

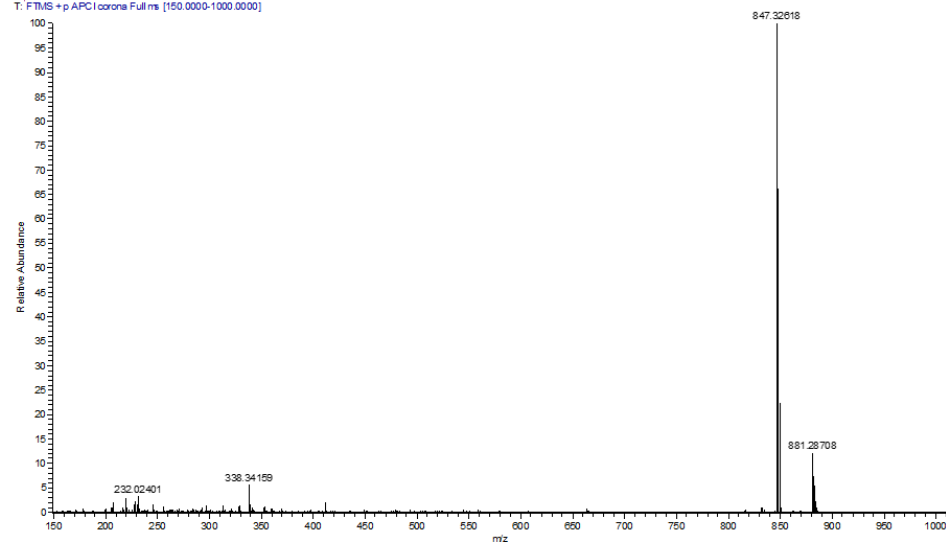

**Figure S54** Mass spectrum (APCI) of **5**

#### 4. Single crystal structures

X-ray crystallography data were collected on a Bruker D8 Venture Diffractometer.

Crystal data and structure refinement for **1k**.

|                                   |                                                                                                                                                                    |
|-----------------------------------|--------------------------------------------------------------------------------------------------------------------------------------------------------------------|
| Empirical formula                 | C <sub>24</sub> H <sub>16</sub> N <sub>2</sub> O <sub>4</sub>                                                                                                      |
| Formula weight                    | 396.39                                                                                                                                                             |
| Temperature                       | 213.00 K                                                                                                                                                           |
| Wavelength                        | 1.34139 Å                                                                                                                                                          |
| Crystal system                    | Monoclinic                                                                                                                                                         |
| Space group                       | C 1 2/c 1                                                                                                                                                          |
| Unit cell dimensions              | $a = 19.9133(3) \text{ Å}$ $\alpha = 90^\circ$ .<br>$b = 8.79260(10) \text{ Å}$ $\beta = 129.2540(10)^\circ$ .<br>$c = 13.9176(2) \text{ Å}$ $\gamma = 90^\circ$ . |
| Volume                            | 1886.95(5) Å <sup>3</sup>                                                                                                                                          |
| Z                                 | 4                                                                                                                                                                  |
| Density (calculated)              | 1.395 Mg/m <sup>3</sup>                                                                                                                                            |
| Absorption coefficient            | 0.503 mm <sup>-1</sup>                                                                                                                                             |
| F(000)                            | 824                                                                                                                                                                |
| Crystal size                      | 0.07 x 0.07 x 0.05 mm <sup>3</sup>                                                                                                                                 |
| Theta range for data collection   | 4.991 to 54.898°.                                                                                                                                                  |
| Index ranges                      | -24 ≤ h ≤ 24, -10 ≤ k ≤ 10, -16 ≤ l ≤ 16                                                                                                                           |
| Reflections collected             | 8005                                                                                                                                                               |
| Independent reflections           | 1761 [R(int) = 0.0289]                                                                                                                                             |
| Completeness to theta = 53.594°   | 97.8 %                                                                                                                                                             |
| Absorption correction             | Semi-empirical from equivalents                                                                                                                                    |
| Max. and min. transmission        | 0.7508 and 0.6358                                                                                                                                                  |
| Refinement method                 | Full-matrix least-squares on F <sup>2</sup>                                                                                                                        |
| Data / restraints / parameters    | 1761 / 0 / 136                                                                                                                                                     |
| Goodness-of-fit on F <sup>2</sup> | 1.070                                                                                                                                                              |
| Final R indices [I > 2σ(I)]       | R1 = 0.0390, wR2 = 0.1112                                                                                                                                          |
| R indices (all data)              | R1 = 0.0414, wR2 = 0.1136                                                                                                                                          |
| Extinction coefficient            | n/a                                                                                                                                                                |
| Largest diff. peak and hole       | 0.214 and -0.193 e.Å <sup>-3</sup>                                                                                                                                 |

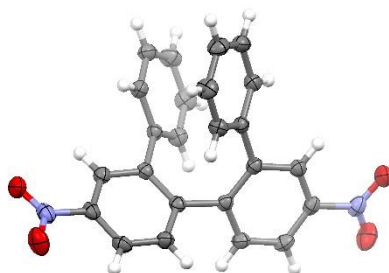

**Figure S55** Structure of **1k** in the crystal (Carbon, oxygen and chlorine atoms are shown as ellipsoids at 50% probability level.)

Crystal data and structure refinement for **2g**.

|                                   |                                             |                                |
|-----------------------------------|---------------------------------------------|--------------------------------|
| Empirical formula                 | C <sub>32</sub> H <sub>20</sub>             |                                |
| Formula weight                    | 404.48                                      |                                |
| Temperature                       | 213.00 K                                    |                                |
| Wavelength                        | 1.34139 Å                                   |                                |
| Crystal system                    | Monoclinic                                  |                                |
| Space group                       | P 1 2 <sub>1</sub> /n 1                     |                                |
| Unit cell dimensions              | a = 10.9132(3) Å                            | $\alpha = 90^\circ$ .          |
|                                   | b = 9.3178(2) Å                             | $\beta = 102.4290(10)^\circ$ . |
|                                   | c = 21.1891(5) Å                            | $\gamma = 90^\circ$ .          |
| Volume                            | 2104.16(9) Å <sup>3</sup>                   |                                |
| Z                                 | 4                                           |                                |
| Density (calculated)              | 1.277 Mg/m <sup>3</sup>                     |                                |
| Absorption coefficient            | 0.350 mm <sup>-1</sup>                      |                                |
| F(000)                            | 848                                         |                                |
| Crystal size                      | 0.07 x 0.07 x 0.05 mm <sup>3</sup>          |                                |
| Theta range for data collection   | 3.686 to 54.983°.                           |                                |
| Index ranges                      | -13 ≤ h ≤ 12, -11 ≤ k ≤ 11, -25 ≤ l ≤ 25    |                                |
| Reflections collected             | 20561                                       |                                |
| Independent reflections           | 3988 [R(int) = 0.0625]                      |                                |
| Completeness to theta = 53.594°   | 99.3 %                                      |                                |
| Absorption correction             | Semi-empirical from equivalents             |                                |
| Max. and min. transmission        | 0.7508 and 0.5953                           |                                |
| Refinement method                 | Full-matrix least-squares on F <sup>2</sup> |                                |
| Data / restraints / parameters    | 3988 / 0 / 289                              |                                |
| Goodness-of-fit on F <sup>2</sup> | 1.058                                       |                                |
| Final R indices [I > 2σ(I)]       | R1 = 0.0512, wR2 = 0.1165                   |                                |
| R indices (all data)              | R1 = 0.0874, wR2 = 0.1373                   |                                |
| Extinction coefficient            | n/a                                         |                                |
| Largest diff. peak and hole       | 0.208 and -0.241 e.Å <sup>-3</sup>          |                                |

Crystal data and structure refinement for **2j**.

|                                   |                                                                                                            |
|-----------------------------------|------------------------------------------------------------------------------------------------------------|
| Empirical formula                 | C <sub>26</sub> H <sub>18</sub> N <sub>2</sub> O <sub>6</sub>                                              |
| Formula weight                    | 454.42                                                                                                     |
| Temperature                       | 213(2) K                                                                                                   |
| Wavelength                        | 0.71073 Å                                                                                                  |
| Crystal system                    | Monoclinic                                                                                                 |
| Space group                       | P 21/c                                                                                                     |
| Unit cell dimensions              | a = 10.7120(6) Å      α = 90°.<br>b = 14.6556(7) Å      β = 107.758(2)°.<br>c = 14.1174(8) Å      γ = 90°. |
| Volume                            | 2110.7(2) Å <sup>3</sup>                                                                                   |
| Z                                 | 4                                                                                                          |
| Density (calculated)              | 1.430 Mg/m <sup>3</sup>                                                                                    |
| Absorption coefficient            | 0.103 mm <sup>-1</sup>                                                                                     |
| F(000)                            | 944                                                                                                        |
| Crystal size                      | 0.180 x 0.150 x 0.120 mm <sup>3</sup>                                                                      |
| Theta range for data collection   | 2.523 to 25.999°.                                                                                          |
| Index ranges                      | -11 ≤ h ≤ 13, -18 ≤ k ≤ 18, -17 ≤ l ≤ 16                                                                   |
| Reflections collected             | 24873                                                                                                      |
| Independent reflections           | 4123 [R(int) = 0.0651]                                                                                     |
| Completeness to theta = 25.242°   | 99.5 %                                                                                                     |
| Absorption correction             | Semi-empirical from equivalents                                                                            |
| Max. and min. transmission        | 0.7456 and 0.5074                                                                                          |
| Refinement method                 | Full-matrix least-squares on F <sup>2</sup>                                                                |
| Data / restraints / parameters    | 4123 / 0 / 310                                                                                             |
| Goodness-of-fit on F <sup>2</sup> | 1.017                                                                                                      |
| Final R indices [I > 2σ(I)]       | R1 = 0.0414, wR2 = 0.1038                                                                                  |
| R indices (all data)              | R1 = 0.0516, wR2 = 0.1131                                                                                  |
| Extinction coefficient            | 0.018(3)                                                                                                   |
| Largest diff. peak and hole       | 0.229 and -0.196 e.Å <sup>-3</sup>                                                                         |

Crystal data and structure refinement for **2m**.

|                                   |                                                |                              |
|-----------------------------------|------------------------------------------------|------------------------------|
| Empirical formula                 | C <sub>32</sub> H <sub>26</sub> O <sub>4</sub> |                              |
| Formula weight                    | 474.53                                         |                              |
| Temperature                       | 213(2) K                                       |                              |
| Wavelength                        | 0.71073 Å                                      |                              |
| Crystal system                    | Triclinic                                      |                              |
| Space group                       | P -1                                           |                              |
| Unit cell dimensions              | a = 13.048(4) Å                                | $\alpha = 81.328(8)^\circ$ . |
|                                   | b = 13.076(3) Å                                | $\beta = 73.961(8)^\circ$ .  |
|                                   | c = 15.272(4) Å                                | $\gamma = 88.817(7)^\circ$ . |
| Volume                            | 2474.9(12) Å <sup>3</sup>                      |                              |
| Z                                 | 4                                              |                              |
| Density (calculated)              | 1.274 Mg/m <sup>3</sup>                        |                              |
| Absorption coefficient            | 0.083 mm <sup>-1</sup>                         |                              |
| F(000)                            | 1000                                           |                              |
| Crystal size                      | 0.180 x 0.150 x 0.120 mm <sup>3</sup>          |                              |
| Theta range for data collection   | 2.752 to 24.995°.                              |                              |
| Index ranges                      | -15 ≤ h ≤ 15, -15 ≤ k ≤ 15, -18 ≤ l ≤ 18       |                              |
| Reflections collected             | 46602                                          |                              |
| Independent reflections           | 8697 [R(int) = 0.1122]                         |                              |
| Completeness to theta = 25.242°   | 97.1 %                                         |                              |
| Absorption correction             | Semi-empirical from equivalents                |                              |
| Max. and min. transmission        | 0.7456 and 0.3980                              |                              |
| Refinement method                 | Full-matrix least-squares on F <sup>2</sup>    |                              |
| Data / restraints / parameters    | 8697 / 0 / 657                                 |                              |
| Goodness-of-fit on F <sup>2</sup> | 1.026                                          |                              |
| Final R indices [I > 2sigma(I)]   | R1 = 0.0794, wR2 = 0.2082                      |                              |
| R indices (all data)              | R1 = 0.1358, wR2 = 0.2583                      |                              |
| Extinction coefficient            | n/a                                            |                              |
| Largest diff. peak and hole       | 0.252 and -0.293 e.Å <sup>-3</sup>             |                              |

Crystal data and structure refinement for **2n**.

|                                   |                                                                                                                                     |
|-----------------------------------|-------------------------------------------------------------------------------------------------------------------------------------|
| Empirical formula                 | C44 H44 O4                                                                                                                          |
| Formula weight                    | 636.79                                                                                                                              |
| Temperature                       | 213(2) K                                                                                                                            |
| Wavelength                        | 0.71073 Å                                                                                                                           |
| Crystal system                    | Monoclinic                                                                                                                          |
| Space group                       | C 2/c                                                                                                                               |
| Unit cell dimensions              | a = 25.2475(12) Å $\alpha = 90^\circ$ .<br>b = 16.4517(9) Å $\beta = 91.9950(10)^\circ$ .<br>c = 17.0389(8) Å $\gamma = 90^\circ$ . |
| Volume                            | 7073.1(6) Å <sup>3</sup>                                                                                                            |
| Z                                 | 8                                                                                                                                   |
| Density (calculated)              | 1.196 Mg/m <sup>3</sup>                                                                                                             |
| Absorption coefficient            | 0.075 mm <sup>-1</sup>                                                                                                              |
| F(000)                            | 2720                                                                                                                                |
| Crystal size                      | 0.120 x 0.090 x 0.060 mm <sup>3</sup>                                                                                               |
| Theta range for data collection   | 2.392 to 24.998°.                                                                                                                   |
| Index ranges                      | -30 ≤ h ≤ 30, -19 ≤ k ≤ 17, -20 ≤ l ≤ 20                                                                                            |
| Reflections collected             | 31370                                                                                                                               |
| Independent reflections           | 6206 [R(int) = 0.0952]                                                                                                              |
| Completeness to theta = 25.242°   | 96.8 %                                                                                                                              |
| Absorption correction             | Semi-empirical from equivalents                                                                                                     |
| Max. and min. transmission        | 0.7456 and 0.5542                                                                                                                   |
| Refinement method                 | Full-matrix least-squares on F <sup>2</sup>                                                                                         |
| Data / restraints / parameters    | 6206 / 0 / 437                                                                                                                      |
| Goodness-of-fit on F <sup>2</sup> | 1.051                                                                                                                               |
| Final R indices [I > 2sigma(I)]   | R1 = 0.0768, wR2 = 0.1718                                                                                                           |
| R indices (all data)              | R1 = 0.1298, wR2 = 0.2072                                                                                                           |
| Extinction coefficient            | n/a                                                                                                                                 |
| Largest diff. peak and hole       | 0.440 and -0.301 e.Å <sup>-3</sup>                                                                                                  |

Crystal data and structure refinement for **3n-Cl**.

|                                   |                                             |                       |
|-----------------------------------|---------------------------------------------|-----------------------|
| Empirical formula                 | C44 H41 Cl O4                               |                       |
| Formula weight                    | 669.22                                      |                       |
| Temperature                       | 213.00 K                                    |                       |
| Wavelength                        | 1.34139 Å                                   |                       |
| Crystal system                    | Orthorhombic                                |                       |
| Space group                       | Pbca                                        |                       |
| Unit cell dimensions              | a = 24.4083(11) Å                           | $\alpha = 90^\circ$ . |
|                                   | b = 7.5812(3) Å                             | $\beta = 90^\circ$ .  |
|                                   | c = 36.9842(15) Å                           | $\gamma = 90^\circ$ . |
| Volume                            | 6843.7(5) Å <sup>3</sup>                    |                       |
| Z                                 | 8                                           |                       |
| Density (calculated)              | 1.299 Mg/m <sup>3</sup>                     |                       |
| Absorption coefficient            | 0.874 mm <sup>-1</sup>                      |                       |
| F(000)                            | 2832                                        |                       |
| Crystal size                      | 0.07 x 0.07 x 0.05 mm <sup>3</sup>          |                       |
| Theta range for data collection   | 3.775 to 54.976°.                           |                       |
| Index ranges                      | -29 ≤ h ≤ 29, -8 ≤ k ≤ 9, -45 ≤ l ≤ 45      |                       |
| Reflections collected             | 69449                                       |                       |
| Independent reflections           | 6429 [R(int) = 0.0874]                      |                       |
| Completeness to theta = 53.594°   | 98.7 %                                      |                       |
| Absorption correction             | Semi-empirical from equivalents             |                       |
| Max. and min. transmission        | 0.7508 and 0.6063                           |                       |
| Refinement method                 | Full-matrix least-squares on F <sup>2</sup> |                       |
| Data / restraints / parameters    | 6429 / 0 / 446                              |                       |
| Goodness-of-fit on F <sup>2</sup> | 1.169                                       |                       |
| Final R indices [I > 2sigma(I)]   | R1 = 0.0974, wR2 = 0.2570                   |                       |
| R indices (all data)              | R1 = 0.1383, wR2 = 0.3152                   |                       |
| Extinction coefficient            | n/a                                         |                       |
| Largest diff. peak and hole       | 0.578 and -0.917 e.Å <sup>-3</sup>          |                       |

Crystal data and structure refinement for **5**.

|                                   |                                                                                                                                  |
|-----------------------------------|----------------------------------------------------------------------------------------------------------------------------------|
| Empirical formula                 | C114 H96 Cl4 O16                                                                                                                 |
| Formula weight                    | 1863.70                                                                                                                          |
| Temperature                       | 173(2) K                                                                                                                         |
| Wavelength                        | 1.54178 Å                                                                                                                        |
| Crystal system                    | Monoclinic                                                                                                                       |
| Space group                       | P21/n                                                                                                                            |
| Unit cell dimensions              | a = 16.5308(18) Å $\alpha = 90^\circ$ .<br>b = 34.980(4) Å $\beta = 111.110(6)^\circ$ .<br>c = 19.638(3) Å $\gamma = 90^\circ$ . |
| Volume                            | 10594(2) Å <sup>3</sup>                                                                                                          |
| Z                                 | 4                                                                                                                                |
| Density (calculated)              | 1.169 Mg/m <sup>3</sup>                                                                                                          |
| Absorption coefficient            | 1.515 mm <sup>-1</sup>                                                                                                           |
| F(000)                            | 3904                                                                                                                             |
| Crystal size                      | 0.400 x 0.300 x 0.200 mm <sup>3</sup>                                                                                            |
| Theta range for data collection   | 2.526 to 72.249°.                                                                                                                |
| Index ranges                      | -19 ≤ h ≤ 18, -42 ≤ k ≤ 42, -23 ≤ l ≤ 23                                                                                         |
| Reflections collected             | 165706                                                                                                                           |
| Independent reflections           | 19503 [R(int) = 0.1523]                                                                                                          |
| Completeness to theta = 67.679°   | 99.3 %                                                                                                                           |
| Absorption correction             | multi-scan                                                                                                                       |
| Max. and min. transmission        | 0.7531 and 0.3706                                                                                                                |
| Refinement method                 | Full-matrix least-squares on F <sup>2</sup>                                                                                      |
| Data / restraints / parameters    | 19503 / 3 / 1234                                                                                                                 |
| Goodness-of-fit on F <sup>2</sup> | 1.567                                                                                                                            |
| Final R indices [I > 2σ(I)]       | R1 = 0.1377, wR2 = 0.3774                                                                                                        |
| R indices (all data)              | R1 = 0.1881, wR2 = 0.4310                                                                                                        |
| Extinction coefficient            | n/a                                                                                                                              |
| Largest diff. peak and hole       | 2.960 and -0.519 e.Å <sup>-3</sup>                                                                                               |

## 5. UV/Vis absorption and fluorescent spectra

UV-vis absorption spectra were recorded on a Hitachi U-3310 UV-vis spectrophotometer. Fluorescence spectra were taken on a Hitachi F-2700 spectrofluorometer.

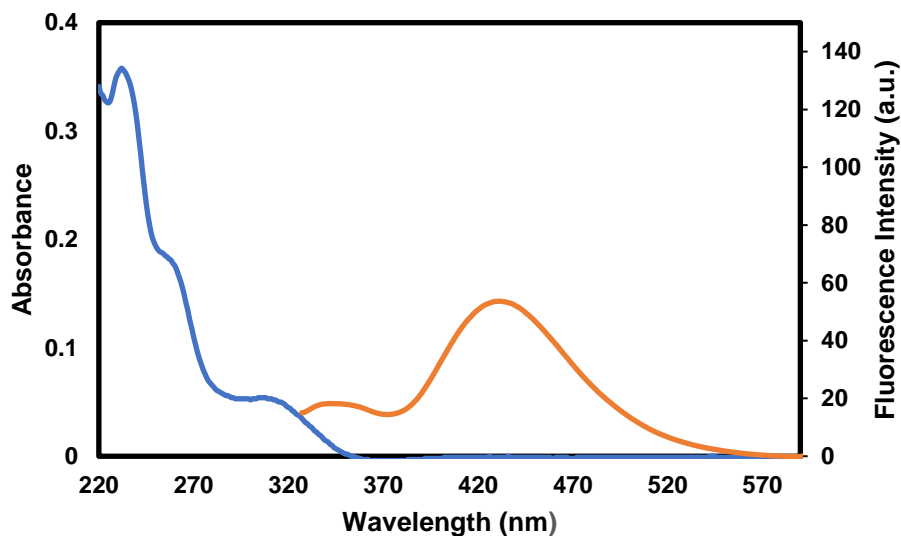

**Figure S56** Absorption (full line) and Fluorescence (dashed line, excited at 306 nm) spectra of **2c** in  $\text{CH}_2\text{Cl}_2$  ( $1 \times 10^{-5}$  mol/L).

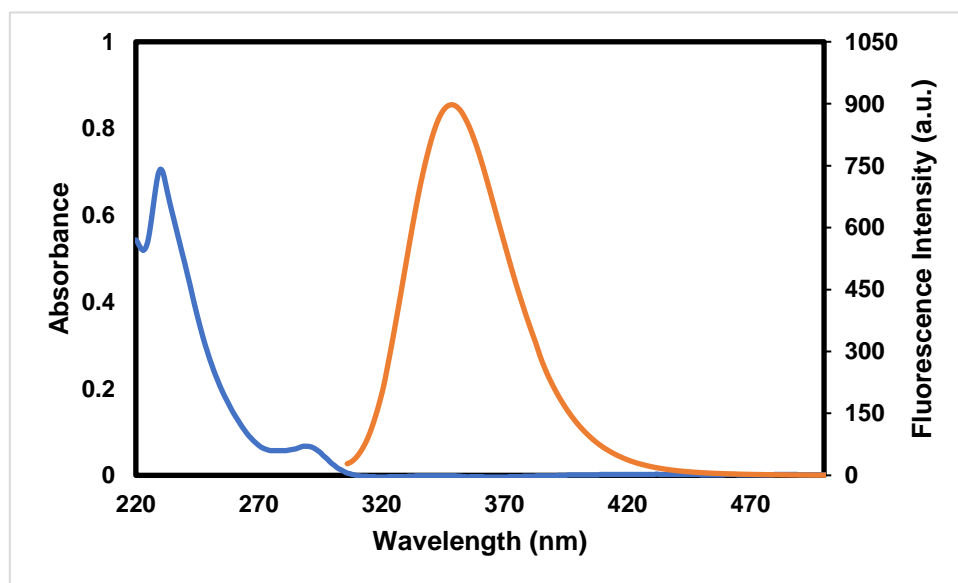

**Figure S57** Absorption (full line) and Fluorescence (dashed line, excited at 289 nm) spectra of **2e** in  $\text{CH}_2\text{Cl}_2$  ( $1 \times 10^{-5}$  mol/L).

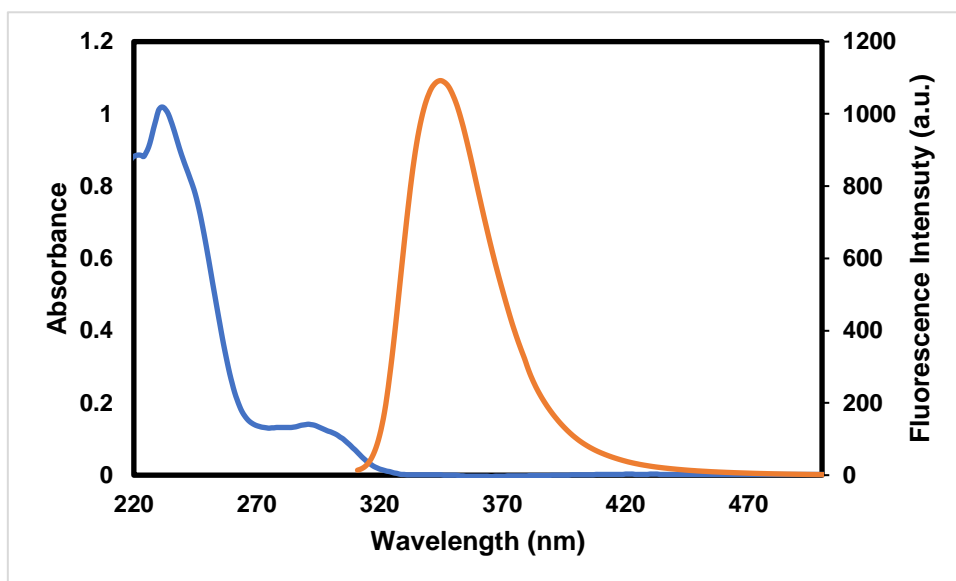

**Figure S58** Absorption (full line) and Fluorescence (dashed line, excited at 290 nm) spectra of **2g** in  $\text{CH}_2\text{Cl}_2$  ( $1 \times 10^{-5}$  mol/L).

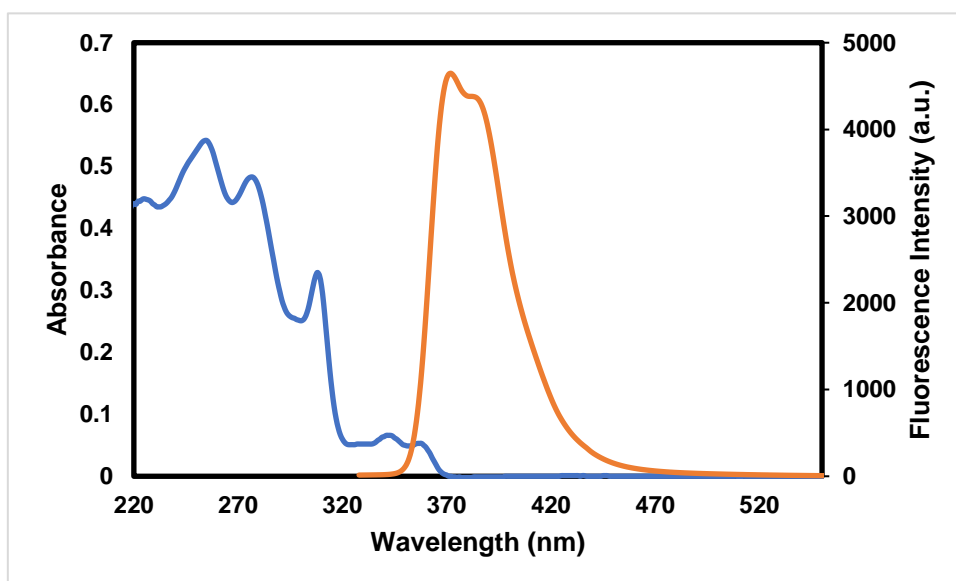

**Figure S59** Absorption (full line) and Fluorescence (dashed line, excited at 308 nm) spectra of **2h** in  $\text{CH}_2\text{Cl}_2$  ( $1 \times 10^{-5}$  mol/L).

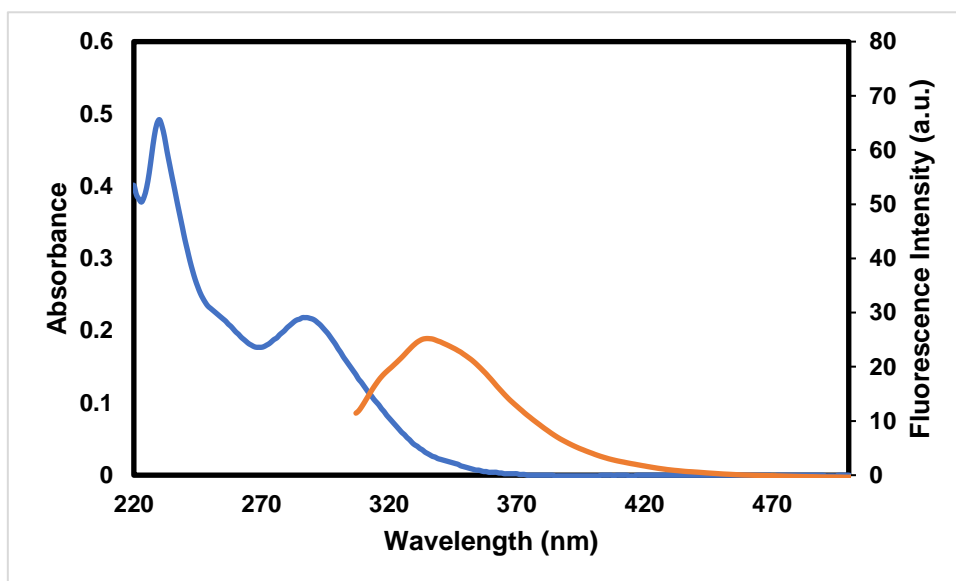

**Figure S60** Absorption (full line) and Fluorescence (dashed line, excited at 288 nm) spectra of **2j** in  $\text{CH}_2\text{Cl}_2$  ( $1 \times 10^{-5}$  mol/L).

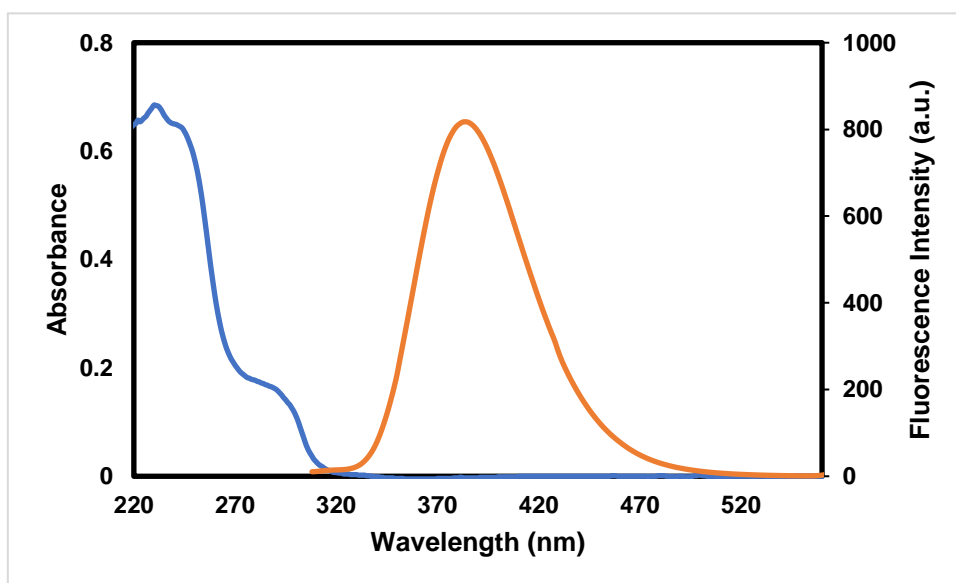

**Figure S61** Absorption (full line) and Fluorescence (dashed line, excited at 288 nm) spectra of **2m** in  $\text{CH}_2\text{Cl}_2$  ( $1 \times 10^{-5}$  mol/L).

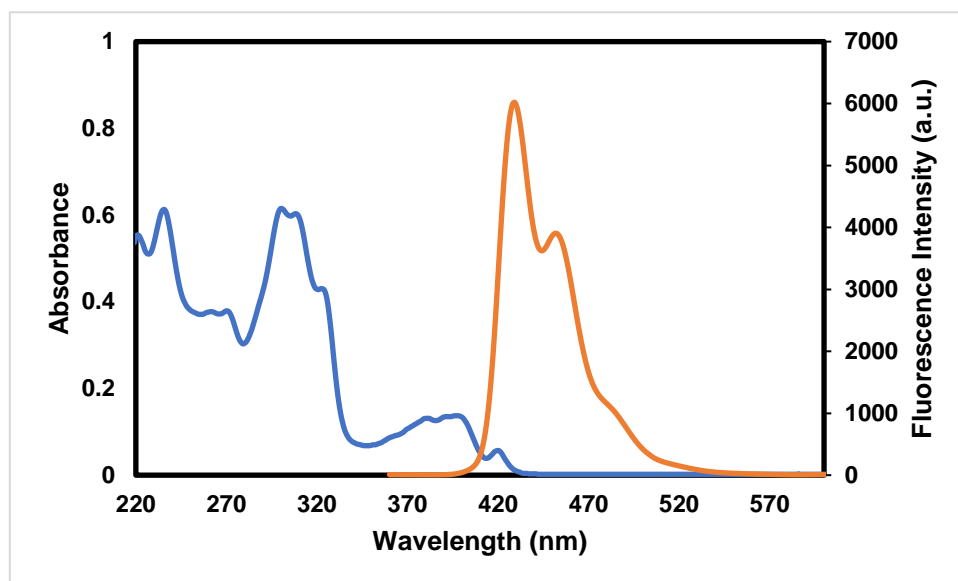

**Figure S62** Absorption (full line) and Fluorescence (dashed line, excited at 301 nm) spectra of **3m** in  $\text{CH}_2\text{Cl}_2$  ( $1 \times 10^{-5}$  mol/L).

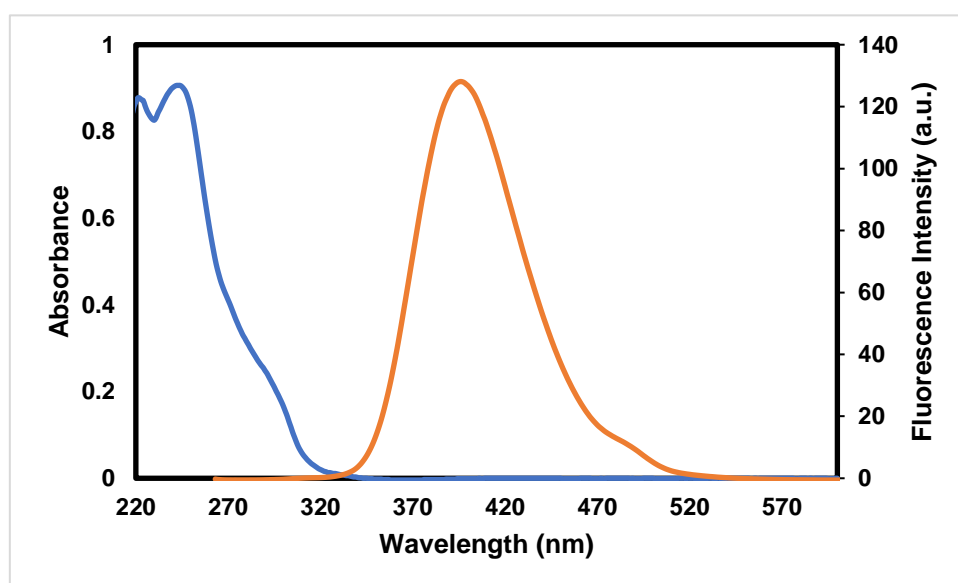

**Figure S63** Absorption (full line) and Fluorescence (dashed line, excited at 242 nm) spectra of **2n** in  $\text{CH}_2\text{Cl}_2$  ( $1 \times 10^{-5}$  mol/L).

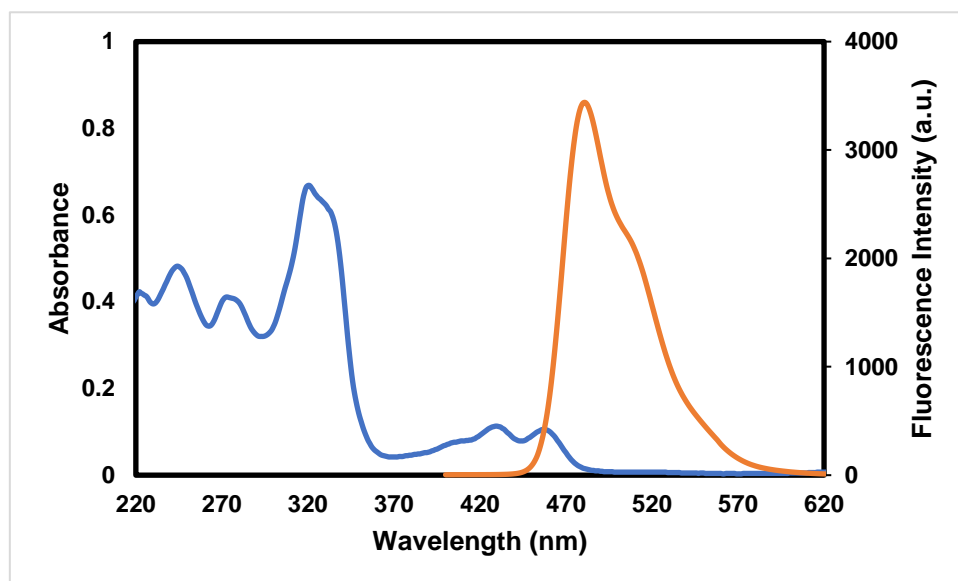

**Figure S64** Absorption (full line) and Fluorescence (dashed line, excited at 320 nm) spectra of **3n** in  $\text{CH}_2\text{Cl}_2$  ( $1 \times 10^{-5}$  mol/L).

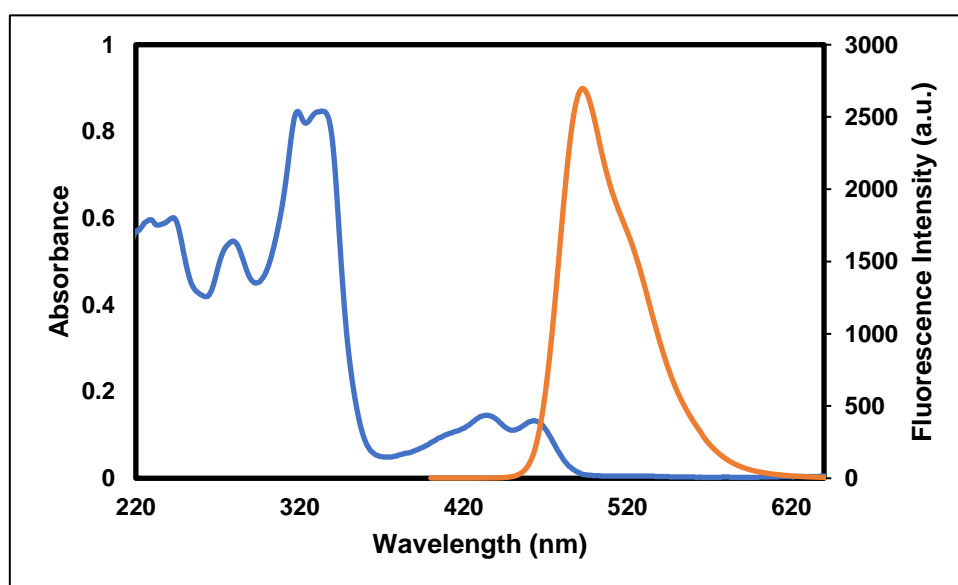

**Figure S65** Absorption (full line) and Fluorescence (dashed line, excited at 334 nm) spectra of **3n-Cl** in  $\text{CH}_2\text{Cl}_2$  ( $1 \times 10^{-5}$  mol/L).

## 6. Chiral resolution and circular dichroism spectrum of **2g**

Compound **2g** was resolved to two enantiomers by Daicel Chiral Technologies (China) Co., Ltd. with a Shimadzu LC-20AT CP-HPLC-06 on a CHIRALCEL OD-H(ODH0CE-KJ063) column using MeOH/ACN=90/10(V/V) as the eluent. From 143 mg of racemic Compound **2g**, 34 mg of one enantiomer (the first fraction) and 38 mg of the other enantiomer (the second fraction) were obtained. Circular dichroism (CD) spectra were recorded on an Applied Photophysics Chirascan<sup>TM</sup> Spectrometer.

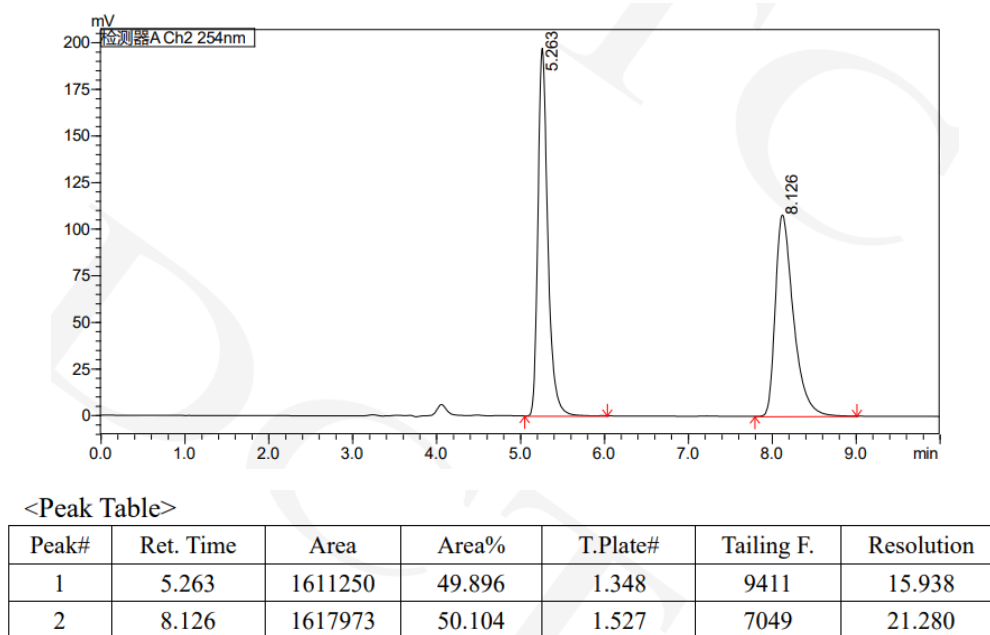

**Figure S66** Chiral HPLC trace for resolution of Compound **2g**.

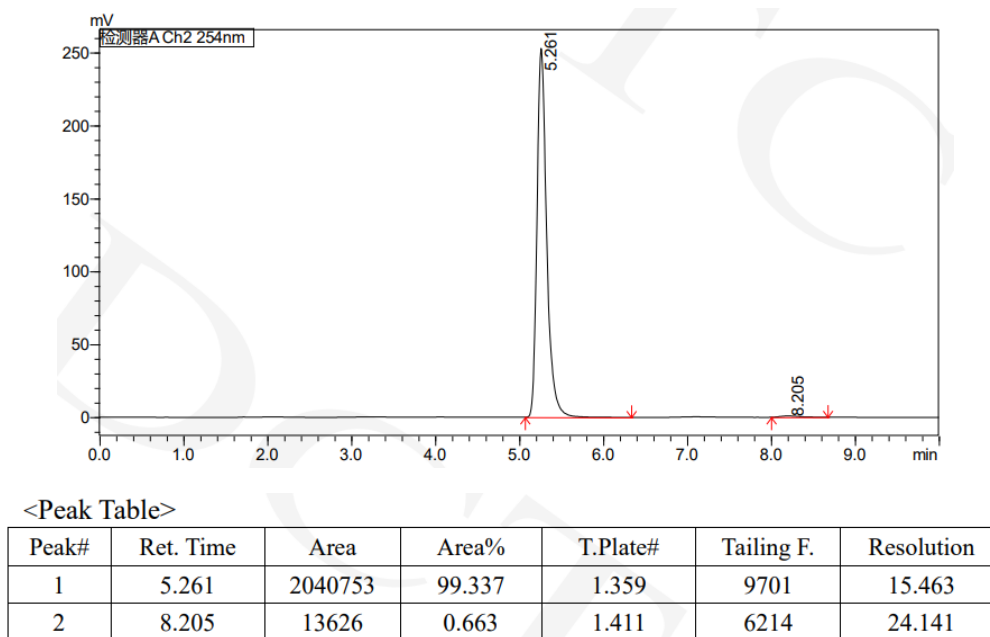

**Figure S67** Chiral HPLC analysis for the first fraction of Compound **2g**.  $[\alpha]_D^{25} = -117$  ( $c = 1.5 \times 10^{-3}$  g/ml in CH<sub>3</sub>CN).

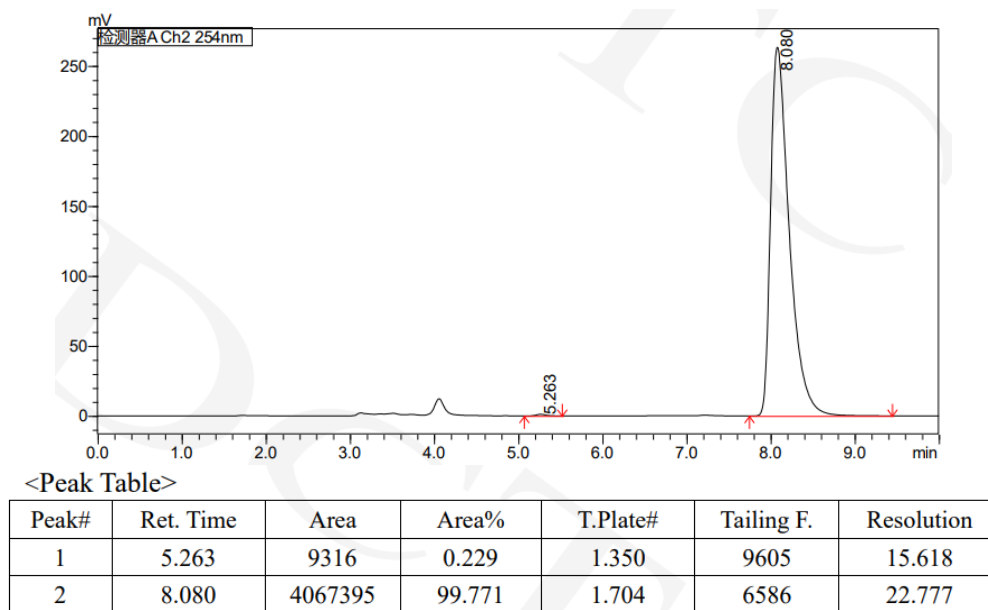

**Figure S68** Chiral HPLC analysis for the second fraction of Compound **2g**.  $[\alpha]_D^{25} = +100$  ( $c = 1.5 \times 10^{-3}$  g/ml in  $\text{CH}_3\text{CN}$ ).

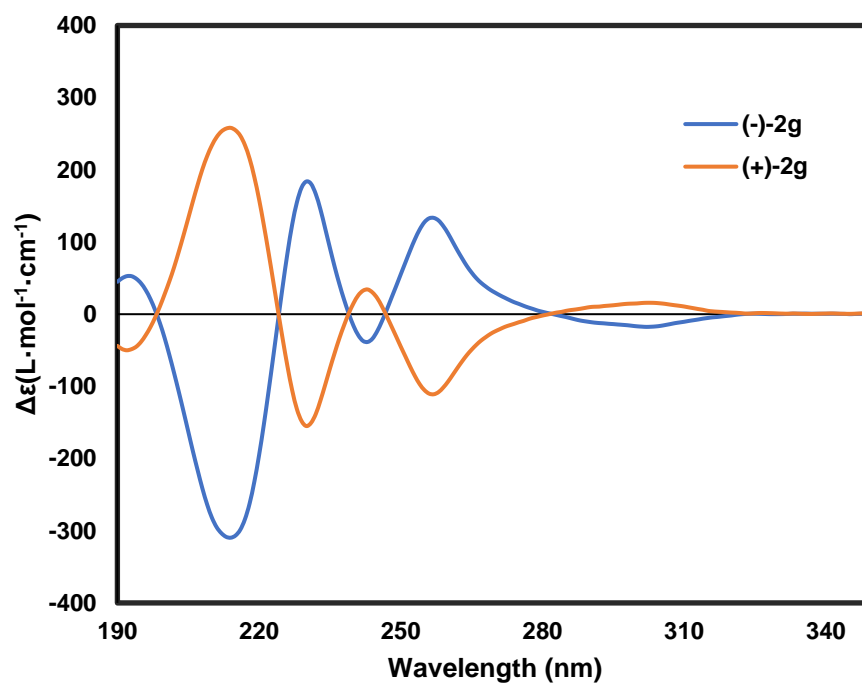

**Figure S69** Circular dichroism spectrum of **2g** in  $\text{CH}_3\text{CN}$  ( $1.2 \times 10^{-4}$  mol/L).

## 7. Density Functional Theory (DFT) Calculations

The Density Function Theory (DFT) calculations were conducted at the level of wB97XD/def2svp with CH<sub>2</sub>Cl<sub>2</sub> solvation using Gaussian 16 program.<sup>10</sup>

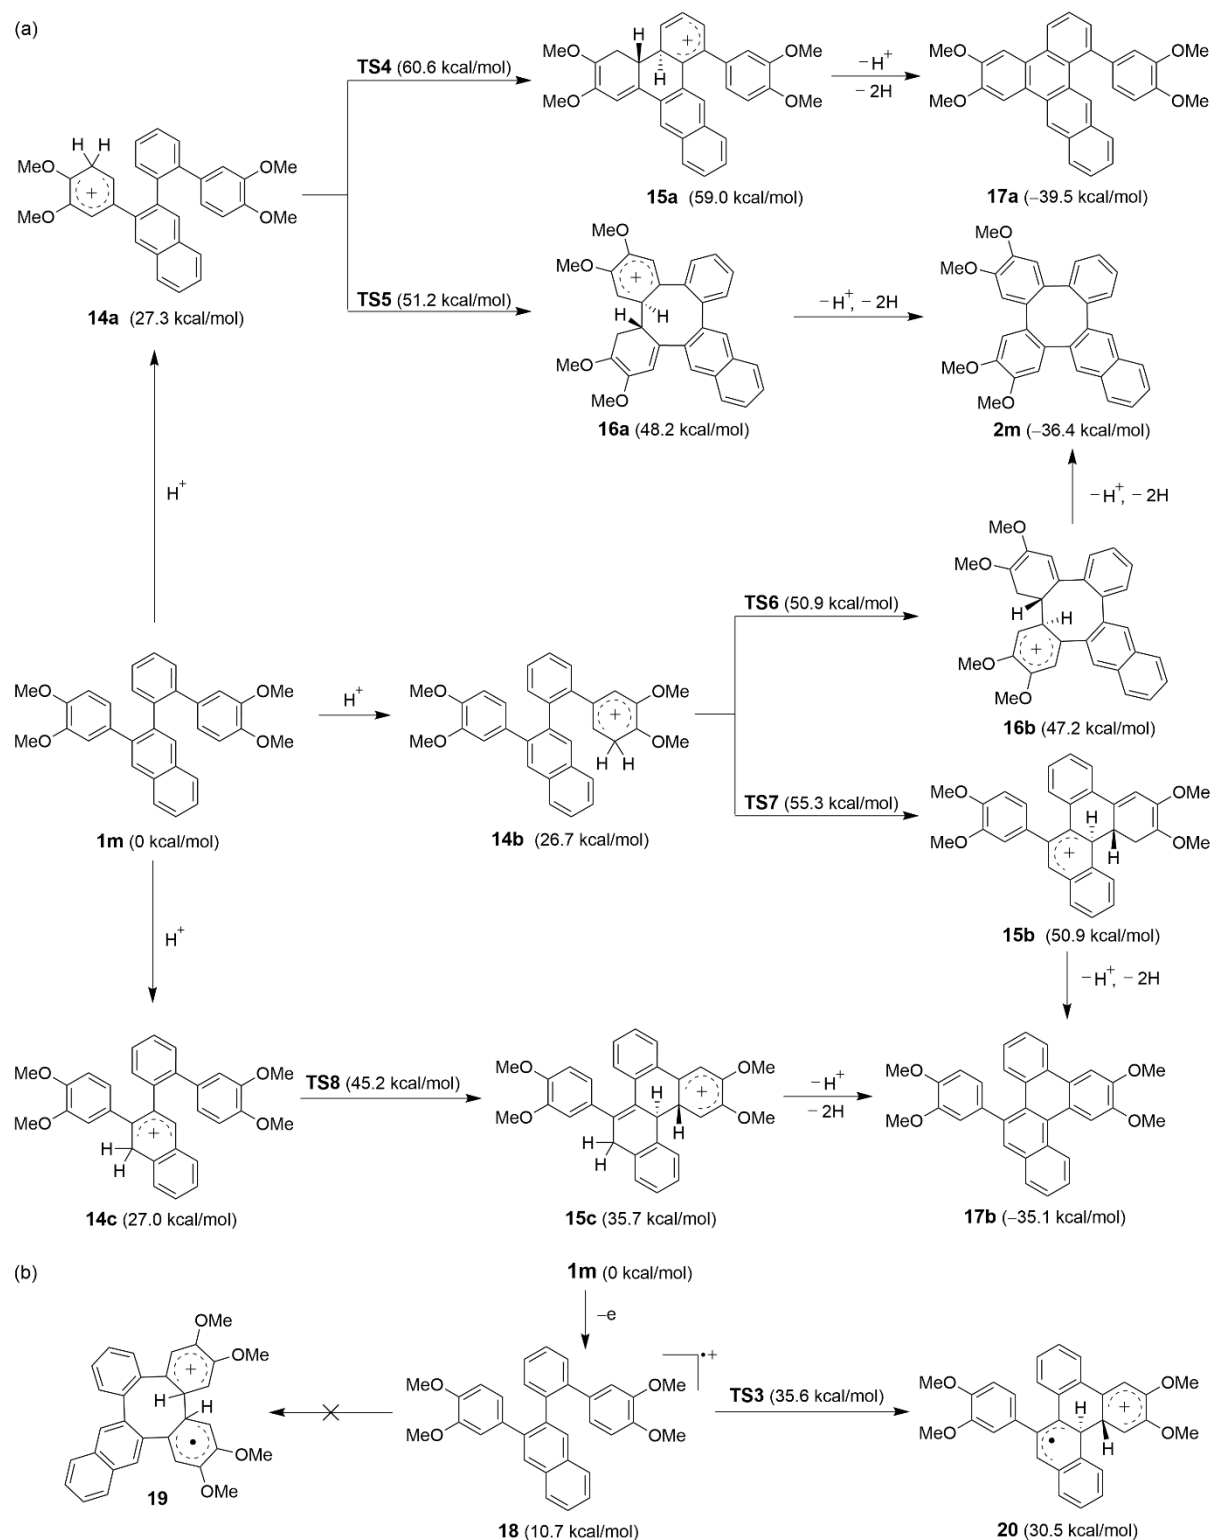

## 8. Cyclic voltammetry

Cyclic voltammetry was performed in a solution of anhydrous  $\text{CH}_2\text{Cl}_2$  with 0.1M tetrabutylammonium hexafluorophosphate ( $\text{Bu}_4\text{NPF}_6$ ) as supporting electrolyte, at a scan rate of  $30 \text{ mV s}^{-1}$ . A platinum bead was used as a working electrode, a platinum wire was used as an auxiliary electrode, and a silver wire was used as a pseudo-reference. Ferrocenium/ferrocene ( $\text{Fc}^+/\text{Fc}$ ) was used as an internal standard.

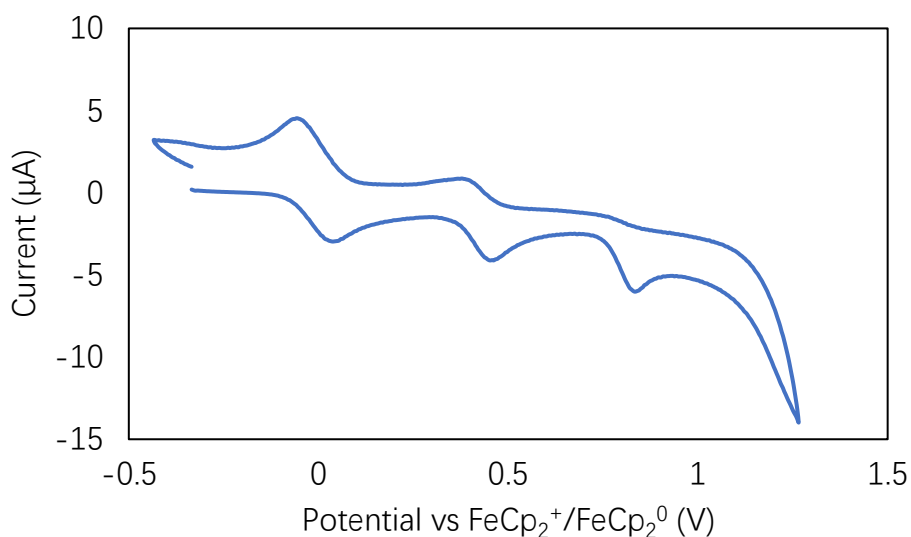

**Figure S70** Cyclic voltammogram of **3n-Cl**

From the first half-wave potential of the first oxidation wave  $E_{ox}^1 = 0.43 \text{ V}$ , the HOMO energy level of **3n-Cl** is estimated as  $-5.52 \text{ eV}$  according to the equation

$E_{HOMO} = E_{\text{Fc}^+/\text{Fc}} - E_{ox}$ . Here,  $E_{\text{Fc}^+/\text{Fc}}$ , the formal potential of the redox couple of ferrocenium/ferrocene ( $\text{Fc}^+/\text{Fc}$ ) in the Fermi scale is  $-5.1 \text{ eV}$ , which is calculated on the basis of an approximation neglecting solvent effects using a work function of  $4.46 \text{ eV}$  for the normal hydrogen electrode (NHE) and an electrochemical potential of  $0.64 \text{ V}$  for ( $\text{Fc}^+/\text{Fc}$ ) versus NHE.<sup>11</sup>

## 9. Fabrication and characterization of organic field effect transistors

The organic field effect transistors (OFETs) of **3n-Cl** were fabricated on a silicon substrate, which was layered with silica, alumina, and 12-cyclohexyldodecylphosphonic acid (CDPA) to form a composite dielectric material. The CDPA-modified  $\text{AlO}_x/\text{SiO}_2$  dielectric was prepared following the reported procedure.<sup>11</sup> Thin film of **3n-Cl** was formed by immersing the substrate into its solution (1.5 mg/mL) in a mixed solvent of  $\text{CH}_2\text{Cl}_2$ /Acetone ( $V/V=2/1$ ) and then pulling it up with a constant speed of 50  $\mu\text{m}/\text{min}$  using a LongerPump TJ-3A syringe pump. The dip-coated films were placed in vacuum at room temperature for 3 h to remove the solvent residue. To complete the fabrication of OFETs, top contact drain and source gold electrodes (30 nm) were vacuum-deposited through a shadow mask onto the organic films using an Edward Auto 306 vacuum coating system with a Turbomolecular pump at a pressure of  $4.0 \times 10^{-6}$  torr or lower, with a deposition rate of ca. 2 nm/min to a thickness about 30 nm as measured by a quartz crystal sensor. The resulting semiconducting channels were 0.5 mm (W) $\times$ 50  $\mu\text{m}$  (L). The field effect mobility in the saturation regime was extracted from these curves using the equation:  $I_{\text{DS}} = (\mu WC_i/2L)(V_{\text{GS}} - V_{\text{th}})^2$ , where  $I_{\text{DS}}$  is the drain current,  $\mu$  is field effect mobility,  $C_i$  ( $= 29.5 \pm 0.5 \text{ nF}/\text{cm}^2$ ) is the capacitance per unit area for the CDPA-modified  $\text{AlO}_x/\text{SiO}_2$ ,<sup>12</sup>  $W$  is the channel width,  $L$  is the channel length, and  $V_{\text{GS}}$  and  $V_{\text{th}}$  are the gate and threshold voltage, respectively. 3 films and 15 channels were tested.

Polarized light micrographs were obtained using a Nikon 50IPOL microscope. X-ray diffractions from thin films were recorded with a SmartLab X-Ray Refractometer. Current-voltage measurement of OFETs was conducted using a probe station and a Keithley 4200 Semiconductor Characterization System in air under ambient conditions.

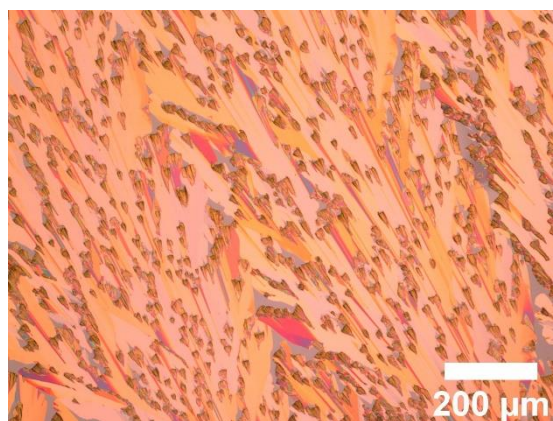

**Figure S71** Reflection polarized light micrograph from dip coated film of **3n-Cl** on CDPA-modified  $\text{AlO}_x/\text{SiO}_2$  using  $\text{CH}_2\text{Cl}_2$ /Acetone as solvent.

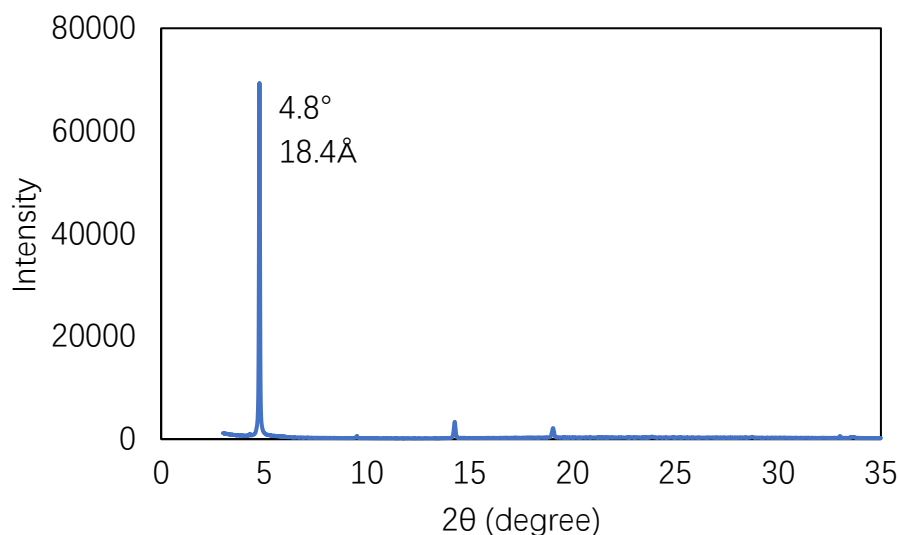

**Figure S72** XRD patterns of thin film of **3n-Cl** on CDPA-modified  $\text{AlO}_x/\text{SiO}_2$ .

## 10. References

- 1) Y. Zhang, J. Han and Z. J. Liu, Palladium-Catalyzed Double-Suzuki-Miyaura Reactions Using Cyclic Dibenziodoniums: Synthesis of *o*-tetraaryls, *J. Org. Chem.*, 2016, **81** (4), 1317-1323.
- 2) D.-J. Liaw, F.-C. Chang, M. Leung, M.-Y. Chou and K. Muellen, High Thermal Stability and Rigid Rod of Novel Organosoluble Polyimides and Polyamides Based on Bulky and Noncoplanar Naphthalene-Biphenyldiamine, *Macromolecules*, 2005, **38**, 4024-4029.
- 3) C.-C. Lee, M. Leung, G.-H. Lee, Y.-H. Liu and S.-M. Peng, Revisit of the Dessy-White Intramolecular Acetylene-Acetylene [2 + 2] Cycloadditions, *J. Org. Chem.*, 2006, **71**, 8417-8423.
- 4) S. Arndt, M. M. Hansmann, F. Rominger, M. Rudolph and A. S. K. Hashmi, Direct Access to  $\pi$ -Extended Phosphindolium Salts by Simple Proton-Induced Cyclization of (*o*-Alkynylphenyl)phosphanes, *Chem. Eur. J.*, 2017, **23**, 5429-5433.
- 5) L. Feng, T. Hu, S. Zhang, H.-Y. Xiong and G. Zhang, Copper-Mediated Deacylative Coupling of Ynones via C–C Bond Activation under Mild Conditions, *Org. Lett.*, 2019, **21**, 9487-9492.
- 6) M.-H. Huang, H.-N. Shi, C.-F. Zhu, C.-L. He, W.-J. Hao, S.-J. Tu and B. Jiang, Stereospecific Synthesis of (*Z,Z*)-Isobenzofurans via Radical-Enabled Cleavage of  $\text{C}(\text{sp}^3)\text{-C}(\text{sp}^3)$  and  $\text{C}(\text{sp}^2)\text{-Halogen}$  Bonds, *Adv. Synth. Catal.*, 2019, **361**, 5340-5345.
- 7) D. Lehnher, C. Chen, Z. Pedramrazi, C. R. DeBlase, J. M. Alzola, I. Keresztes, E.B. Lobkovsky, M. F. Crommie and W. R. Dichtel, Sequence-defined oligo(*ortho*-arylene) foldamers derived from the benzannulation of *ortho*(arylene ethynylene)s, *Chem. Sci.*, 2016, **7**, 6357-6364.
- 8) J.-F. Cui, C. Chen, X. Gao, Z.-W. Cai, J.-W. Han, H. N. C. Wong, 2,3,10,11-Tetrahydroxytetraphenylene and its application in molecular recognition, *Helv. Chim. Acta*, 2012, **95** (12), 2604-2620.

- 9) M. Iwasaki, Y. Araki, S. Iino, and Y. Nishihara, Synthesis of Multisubstituted Triphenylenes and Phenanthrenes by Cascade Reaction of o-Iodobiphenyls or (Z)- $\beta$ -Halostyrenes with o-Bromobenzyl Alcohols through Two Sequential C–C Bond Formations Catalyzed by a Palladium Complex, *J. Org. Chem.*, 2015, **80**, 9247–9263.
- 10) Frisch, M. J.; Trucks, G. W.; Schlegel, H. B.; Scuseria, G. E.; Robb, M. A.; Cheeseman, J. R.; Scalmani, G.; Barone, V.; Mennucci, B.; Petersson, G. A.; Nakatsuji, H.; Li, X.; Caricato, M.; Marenich, A. V.; Bloino, J.; Janesko, B. G.; Gomperts, R.; Mennucci, B.; Hratchian, H. P.; Ortiz, J. V.; Izmaylov, A. F.; Sonnenberg, J. L.; Williams-Young, D.; Ding, F.; Lipparini, F.; Egidi, F.; Goings, J.; Peng, B.; Petrone, A.; Henderson, T.; Ranasinghe, D.; Zakrzewski, V. G.; Gao, J.; Rega, N.; Zheng, G.; Liang, W.; Hada, M.; Ehara, M.; Toyota, K.; Fukuda, R.; Hasegawa, J.; Ishida, M.; Nakajima, T.; Honda, Y.; Kitao, O.; Nakai, H.; Vreven, T.; Throssell, K.; Montgomery, J. A.; Peralta, J. E.; Ogliaro, F.; Bearpark, M. J.; Heyd, J.; Brothers, E. N.; Kudin, K. N.; Staroverov, V. N.; Keith, T. A.; Kobayashi, R.; Normand, J.; Raghavachari, K.; Rendell, A. P.; Burant, J. C.; Iyengar, S. S.; Tomasi, J.; Cossi, M.; Millam, J. M.; Klene, M.; Adamo, C.; Cammi, R.; Ochterski, J. W.; Martin, R. L.; Morokuma, K.; Farkas, O.; Foresman, J. B.; Fox, D. J. Gaussian, Inc., Gaussian 16, Revision C.01, Wallingford CT, 2016.
- 11) C. M. Cardona, W. Li, A. E. Kaifer, D. Stockdale and G. C. Bazan, Electrochemical considerations for determining absolute frontier orbital energy levels of conjugated polymers for solar cell applications, *Adv. Mater.*, 2011, **23**, 2367–2371.
- 12) S. H. Pun, Y. Wang, M. Chu, C. K. Chan, Y. Li, Z. Liu and Q. Miao, Synthesis, Structures and Properties of Heptabenzo[7]circulene and Octabenzo[8]circulene”, *Journal of the American Chemical Society*, 2019, **141**, 9680–9686.
